# Supplementary material for: Improved Cloud Phase Determination of Low Level Liquid andMixed Phase Clouds by Enhanced Polarimetric Lidar
Source: Copernicus journal article supplement (doi:10.5194/amt-2017-327), 2017-09-19
Supplement: Supplementary file [file amt-2017-327-AC1-supplement.pdf]

## Author's Response to Reviewers Comments (Review 1)

**Title:** Improved Cloud Phase Determination of Low Level Liquid and Mixed Phase Clouds by Enhanced Polarimetric Lidar

The authors would like to first thank the reviewers for their thoughtful and constructive comments on our manuscript. The comments, taken from the provided reviews, have been copied in bullet format and addressed in the sub-bullets. A draft of the changes is also included where omissions are marked with **red** and additions are given in **blue**. The line numbers for comments are referenced to the original draft and for responses to the revised draft.

- Comment (Location in Original Draft)
  - Response (Location in Revised Draft)

The authors have changed several portions of this manuscript in line with major changes requested by the reviewers. Section 2 has been reorganized and greatly reduced by including much of the derivation of volume diattenuation and depolarization to Appendix A. A response pertaining to the selected lidar ratios is presented here referring to multiple comments from reviewers. That response is split and referenced as necessary. General clarifications on scope and wording have also been made throughout.

### Reviewer 1

- Major Comment 1: To what extent would the results change with different lidar ratios? Was there a reason such a low lidar ratio was used? (Section 3.2).
  - The goal of this classification is not to quantitatively measure cloud/aerosol backscatter coefficient but rather to differentiate clear air from aerosol and clouds. The lidar ratio and thresholds used to differentiate clear air, aerosols, and cloud particles are linked; changing one will necessitate the change of the other, i.e. raising/lowing the lidar ratio affects the final backscatter ratio from the measurements. However, running our 6-month case study with a fixed set of thresholds and changing the lidar ratio is possible. The results are shown below in Figure R1. Lidar ratios of 10 (solid lines), 20 (dotted lines), and 30 (dash-dotted lines) are presented.

There is a rule in the classification scheme that overwrites aerosol as ice with high depolarization ratio. This tends to limit the effect of changing the lidar ratio for ROIC and HOIC. Changing the lidar ratio does however start to change the interpretation of liquid and clear air shown by the dramatic reduction of cases labeled by CAPABL as liquid with nonzero LWP. The authors have found that a ratio of 10 is a reasonable threshold to separate liquid from clear air based on the comparison with LWP and radar. The radar comparisons of reflectivity in particular suggest that a lidar ratio of 10 is reasonable, as clear air should have, by far, the lowest reflectivity. Using a higher value for the lidar ratio decreases the number of cases identified by CAPABL as liquid that have non-zero LWP (CDF is shifted up) and raises the number of cases identified by CAPABL as clear with higher reflectivity (CDF is shifted down). With the data presented in Figure R1, we can tune the inversion parameters used to maximize data consistency with non-lidar instrumentation over long periods of time (months to years) and then verify they are reasonable for shorter periods (minutes to hours). Thus, because we only seek to separate these 4 categories (and only because we don't seek to make quantitatively correct determinations of backscatter coefficient), the low lidar ratio (that is constant in time) is reasonable.

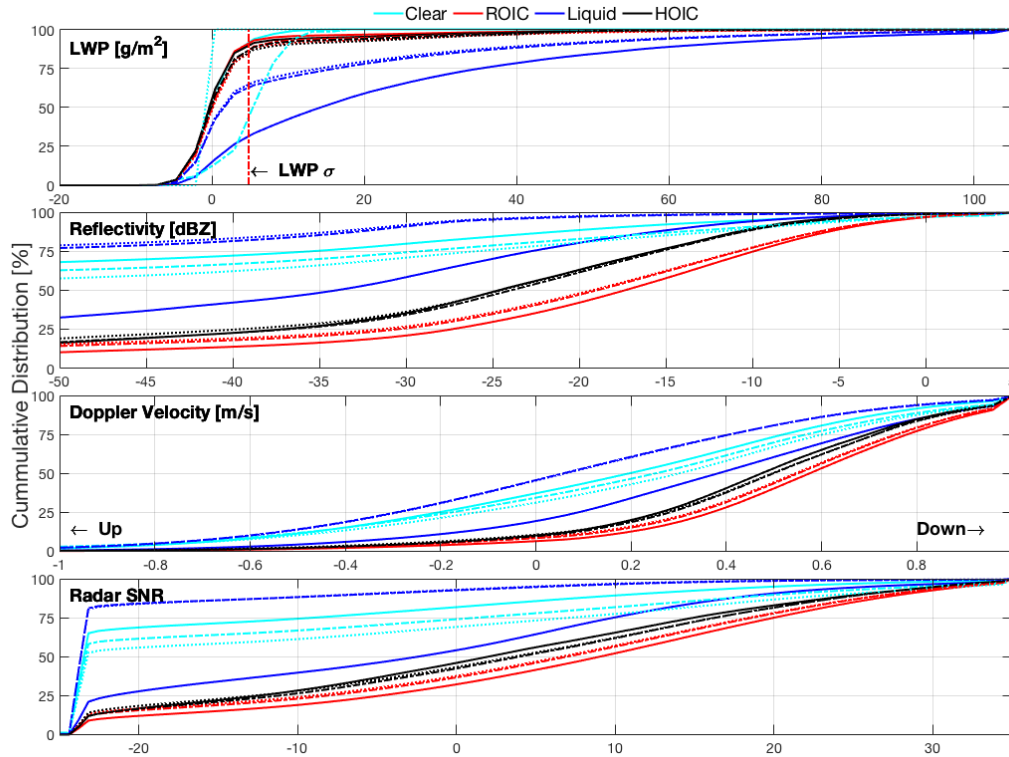

**Figure R1: Multisensor analysis of the presented data (manuscript Fig. 6) with differing lidar ratios. The data are presented as described in the legend with line types: Solid lines = lidar ratio of 10, Dotted lines = lidar ratio of 20, and Dash-dot lines = lidar ratio of 30.**

- Major Comment 1: The lidar ratio citation should be to the original authors and not as compiled by Nott and Duck. (Section 3.2)
  - The authors have cited the Hoffmann et al. 2009 paper identified by Nott and Duck. This change can be found on page 9, line 23.
- Major Comment 2: The region where the sharp shifts in FO of liquid and ice at low LDR are relevant, and I think an analysis of this region, and how much changing the thresholds would affect the results, should be presented here (or in a supplementary material /Appendix). (Section 3.3)
  - The authors have performed the analysis suggested by the reviewer. The authors have re-analyzed the entire data set presented with depolarization thresholds from 0.05 to 0.30 with 0.01 spacing. Plotted below, in Figure R2, is the fractional occurrence of liquid and ice measured for July-October 2015 from the analog detection channel. Above approximately  $\delta_o = 0.11$ , the fractional occurrence stabilizes until approximately  $\delta_o = 0.20$ . Beyond that point, ice clouds are being lumped into the water fractional occurrence. Any value  $0.11 \leq \delta_o \leq 0.20$  will yield similar conclusions for fractional occurrence change. From this we conclude that  $\delta_o = 0.11$  is a reasonable threshold to use for the CAPABL data set and based on available literature.

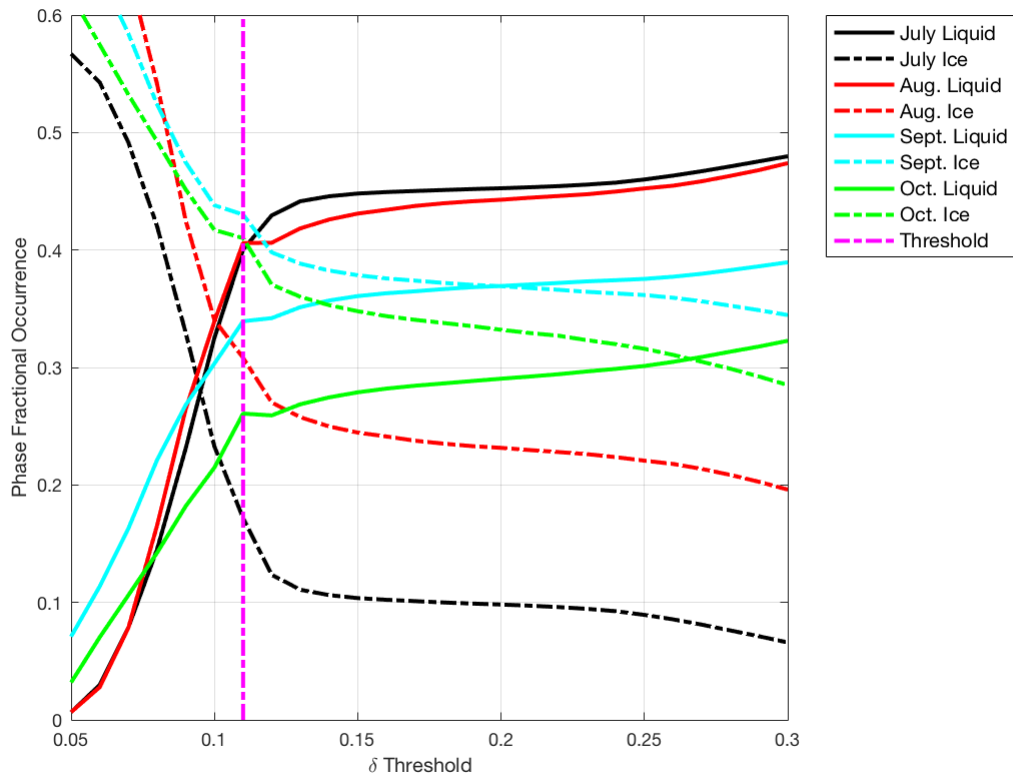

**Figure R2: Fractional occurrence estimates of the first 4 months of available data with varying depolarization ratio thresholds from 0.05 to 0.3 in step sizes of 0.01.**

- Major Comment 3: This analysis seems to underestimate liquid amount. Is it enough to have a single voxel after filtering for a column to be treated as liquid?
  - For this analysis, the authors have considered it sufficient for a single liquid voxel to describe a whole column. Even so, the reviewer is exactly right about underestimating liquid. This classification does tend to underestimate liquid amount because of a number of factors. First, full column measurements of optically thick clouds are, to the authors' knowledge, not currently demonstrated. Lidar systems do however provide a reasonable understanding of cloud base and bottom-of-cloud phase before signal extinction. Second, the unknown lidar ratio as mentioned is a substantial problem for quantitative studies. Finally, reviewer 2 mentions multiple scattering, which is altering the interpretation of approximately 2% of liquid/ice voxels in this data set (seen in Table 5, cell G and described in more detail in the response to reviewer 2's comment). With all of these effects, observing the whole column of liquid remains an issue that lidar systems alone show little promise to completely solve. However, with polar clouds in particular, the ice phase having lower optical thickness than liquid allows for the potential to identify liquid by a very small number of voxels at cloud base. To what extent this facilitates improvement in observing polar clouds can be seen, for example, in Figure 6. 30% of liquid layers that CAPABL identifies are not definitively identified by MWR. This observational bias would result in a skewing cloud radiative effect analyses using LWP information solely from MWRs towards clouds with high optical depth. For deeper analyses of mixed phase clouds, the authors would be remiss to suggest use of this column classification as the only data point, however.

- Major Comment 4: Is there a blind zone between analog and photon counting near 1.5 km? A missed detection analysis is needed to confirm that hydrometeors are not missed by CAPABL to strengthen the reliability of the studied methodology. For example, provide the percentage of occurrence where MWR data has non-zero LQP but CAPABL does not see liquid. Additionally, provide the percentage of occurrences where the MMCR has data above its detection threshold where CAPABL lacks data.
  - The authors agree that such an analysis is needed and now have included the suggested values in the text. Using liquid water path as the indicator of liquid water, CAPABL observes water columns or obscured data at 83% of the times that the MWR observes LWP values greater than its error limit. The MWR observes LWP values greater than its error limit for 3% of clear air/aerosol columns, 10% of ROIC columns, and 4% of HOIC columns. It is important to note, however, that this might be anomalously high for HOIC and ROIC based on errors in LWP retrievals as described below in response to Reviewer 3's Minor comment 5. CAPABL has valid data (passing all the filtering steps described) 75.3% of the time where the MMCR has data above its error threshold. These values have been added to the text in Section 5.3 on page 18, lines 34-35 and on page 19, lines 1-4.
- Major Comment 5: The MPL does not appear to be a great instrument to validate CAPABL. I suppose that the delicate fixed liquid/ice determination thresholds have a more significant role in the MPL data analysis as well. (Section 5)
  - The authors need to clarify that the analysis we termed multisensory validation is actually a comparison. The title of Section 5 and subsequent references have been changed to reflect this clarification. There are a number of reasons that comparison with the MPL is of concern. This is one reason to first include the analysis of analog, photon counting, and merged data in Figures 3 and 5 from CAPABL data alone. We consider the analysis an internal comparison that indicates that low-level Arctic clouds are extremely difficult to observe fully with purely photon counting detection. This calibrates expectation on the later comparison between CAPABL and the MPL. This internal comparison is less sensitive to the actual threshold values described in Table 2 than the comparison between CAPABL and the MPL, indicating the issues related to inability to fully measure the dynamic range of interest. We too are surprised by the overall performance of the MPL but after completing the comparison of CAPABL's photon counting signals with our fully merged data product, we believe the results to be aligned with the overall capability.
- Minor Comment 1: Add "volume pixel" in parentheses after "voxel". (Page 9, Line 25)
  - The suggested change has been made. This can be found now on page 8, line 33.
- Minor Comment 2: Change "is" to "are". (Page 14, Line 9)
  - The suggested change has been made. This can be found now on page 12, line 29.
- Minor Comment 3: Please be consistent and use either "Fig." or "Figure". (Page 15, Line 2 and throughout)
  - The guidelines followed were to use "Fig." in running text and "Figure" at the start of sentences. Consistency changes have been made in the following places but not in the line identified by the reviewer:
    - Page 13, line 19
    - Page 18, line 13
    - Page 18, line 18
    - Page 18, line 24
    - Page 19, line 8
    - Page 20, line 33
- Minor Comment 4: Please provide a citation for this low LWP uncertainty. (Page 16, Line 27-28)
  - The Cadeddu et al. 2013 reference is appropriate here and has been moved from the

previous line (Page 16, Line 29) to the end of the cited information. The new citation can be found on page 15, lines 21-22.

- Minor Comment 5: Change “has” to “have”. (Page 19, Line 17)
  - The suggested change has been made. This change can be found on page 18, line 13.
- Minor Comment 6: Please provide a citation for this argument regarding the cirrus mode artifacts. (Page 20, Line 2-3)
  - The Clothiaux et al. 1999 reference is added to page 19, line 9.
- Minor Comment 7: Could there be a height effect of CAPABL measurements as well affecting the integrated column measurements?
  - The authors believe this question refers to our analysis of lower radar reflectivity values for HOIC vs. ROIC. If so, there is almost certainly a geophysical height effect to the observations of HOIC related to the ambient temperature. Much work related to the CALIOP instrument aboard the CALIPSO satellite (e.g. Noel and Chepfer (2010)) indicates strong temperature dependence based on ice crystal habit. That said, having the ability to better sample a region of the atmosphere, in this case low altitudes from ground based measurements, almost certainly causes non-ideal sampling (though to the authors’ knowledge not currently provable). It is entirely possible that HOIC are much larger on average than ROIC (indicating they should have higher radar reflectivity) and that the population observed to create our presented results have a bias. The authors simply intend to call the readers attention to this suspected bias as they related to satellite based measurements that can be similarly biased but to observe high, rather than low, clouds.
- Minor Comment 8: Please consider changing the colorbar around 0 to grey, as it is impossible to distinguish between missing or “bad” lidar returns and values near zero. (Figure 1)
  - The suggested change has been made. The colorbars on Figure 1 and 2, subplots Diattenuation and Backscatter Ratio, have had white removed from them.
- Minor Comment 8-9: Consider extending the scale of the relative backscatter panel, as it is impossible to separate the intense lower liquid layers’ returns from the noisy background. (Figure 1 and Figure 4).
  - The colorbars on Figures 1, 2, and 4 have all been extended as suggested.
- Minor Comment 8: I suggest adding daily sounding temperature profile to the plot to enable the examination of the reliability of the HOIC classification given the temperature range. (Figure 1)
  - The authors believe that a complete analysis of the temperature dependence of our HOIC measurements would be extremely interesting and certainly enlightening. The author have elected however to leave the temperature dependence off of our Figures 1 and 2 in favor of the measurements used in our classification scheme. The reasons for this are as follows:
    1. The authors make no requirement of the HOIC flag based on temperatures. Though findings from CALIOP aboard the CALIPSO satellite (e.g. Noel and Chepfer (2010)) indicate temperature dependence, we do not leverage it for our classification scheme. We thus find that adding temperature to Figures 1 and 2 would distract from the flow intended with these figures and with Table 2.
    2. The authors are currently performing an analysis of the HOIC flag relative to all ancillary measurements at Summit. The temperature of instances of HOIC measured from radiosondes are given below in Figure R3. This analysis is found to be by no means simple and is well beyond the scope of this paper, in which the authors really want to focus on non-orthogonal polarization measurements and classification.

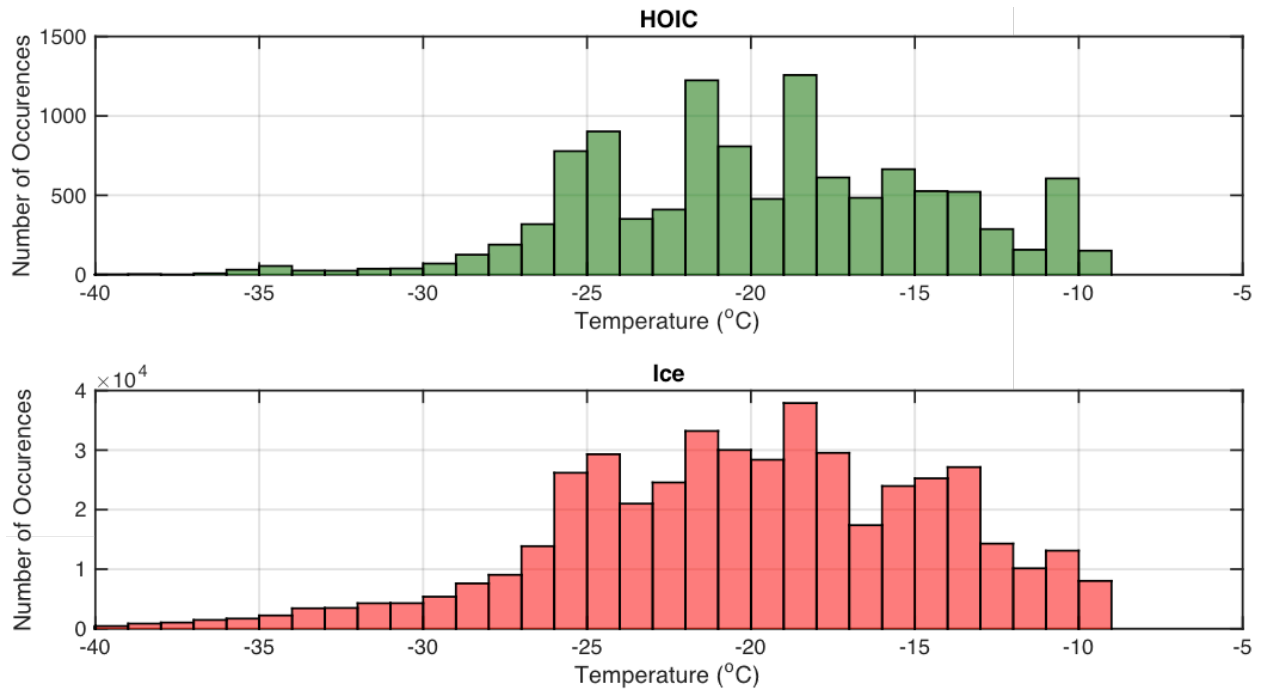

**Figure R3: Temperatures of ROIC and HOIC voxels interpolated from radiosonde measurements for the first year of available CAPABL data.**

- Minor Comment 10: Please have a citation for the approximation given in the caption. (Figure 6 caption)
  - A reference to Bendix (2002) has been added as suggested.

## Reviewer 2

- Major Comment 1: Several passages should be moved throughout the text to better organize your work and motivate your lengthy derivations in Section 2.1.
  - The authors agree with the reviewer that motivation is required for the more technical derivation portion of this work. We have taken the suggested paragraph and moved it to the front of section 2.1. This can now be found on pages 3, lines 28-33 and page 4, lines 1-7. The suggested summary sentence about the enhancements due to non-orthogonal polarization measurements and analog/photon counting detection has been added to the abstract. This change can now be found on page 1, lines 14-15.
- Major Comment 1: Drastically reduce the equations in part 2.1.
  - The suggested change has been made with derivation equations now included in Appendix A for the interested reader. The remaining equations are the Stokes vector lidar equation from which all variables are defined, the definitions of volume depolarization and volume diattenuation used for this classification scheme, and the criteria required allowing valid inversions when using a 3-polarization inversion method. The authors have thus moved all the detailed definitions and inversions for the curious reader while maintaining the relevant equations.
- Major Comment 2: Can you elaborate on your decision to use a lidar ratio of 10 and/or check if your results change for other lidar ratios values?
  - The analysis requested has been provided above in Figure R1 in response to a similar comment by Reviewer 1 (major comment 1). The value of the lidar ratio does not change the analysis provided of ROIC/HOIC because of the classification rule that overwrites aerosol layers with high depolarization ratio values as ice. This additional rule softens the hard limit indicated by the classification thresholds. The fixed lidar ratio value does affect the liquid/clear air interpretation, however, and is set to 10 for this analysis. This value is a direct result of the desire not to quantitatively assess cloud backscatter coefficients but rather to separate clouds from clear air and aerosol layers. This limitation of not knowing the lidar ratio in the observations made by elastic scattering lidar systems necessitates the restriction in scope of scientific inquiry that is possible to unambiguously address. The authors believe that the goal of classification is well within this scope and demonstrate in our manuscript logical consistency with instrumentation that does not require such assumptions.
- Major Comment 3: Can you quantify the difference that multiple scattering causes in your data set using the two fields of view you describe?
  - The authors agree that multiple scattering should be addressed. We have added the requested comparison, which comes directly from Table 5. In the summer months, up to 5% of liquid voxels identified by the MPL are mischaracterized by CAPABL; this value falls to 2% over the 6-month period. These values have been added to the text in Section 5.2 on page 17, lines 18-24.
- Major Comment 4: Suggest removing the subplots for clear air and ice voxels and focus primarily on the liquid panel in Figure 3.
  - The authors have followed the reviewer's suggestion and removed the ice and clear air portion of Figure 3. The authors have also modified the text on page 11, lines 22-26 accordingly to focus on liquid voxels. The ice and clear air portions have been relocated to Appendix C. The authors feel that this relocation is reasonable because the main point of voxel misidentification is still made and the interested reader can still find a complete analysis if curious.
- Major Comment 4: Please provide PDF versions of Figures 6 and 7 to decide if cumulative distribution functions are the best visualization of the data.

- The requested figures are included below (Figures R4 and R5 correspond to manuscript Figure 6 and Figures R6 and R7 correspond to manuscript Figure 7). The attached probability density functions are normalized by their area to 1 (Figures R4 and R6) and to their maximum value to bring all functions into the same scale (Figures R5 and R7). Note that with the normalization to the maximum value, the PDFs do not have an integral of 1 but the scales are the same for comparison purposes. The authors prefer CDFs for a number of reasons:
  1. PDFs represent probability with areas while CDFs represent probability with vertical distances. Because the authors are trying to represent a fundamentally continuous distribution with sampled data that is discrete, the data is not smooth. It is clearer to see the changes in vertical distance on the CDFs than to estimate the area of a jagged object.
  2. CDFs are independent of the number of histogram bins used to create them where PDFs can change their behavior (how jagged they are) based on the width of bins chosen again due to the jagged nature of sampled data.
  3. End cases appear cleaner in CDFs. Two possibilities exist for end cases with PDFs: either all end cases are lumped in the first or final bin resulting in erroneous spikes or end cases are not observed giving the false impression that the integral areas represented are necessarily equal. For example, in Doppler Velocity or radar SNR (Figure R4 and R5 below), misleading spikes appear because the authors have chosen to include all data. These spikes can be wrongly interpreted as important when they are simply data collected from all end cases and do not have the same bin width as other data shown.
  4. The CDF will by definition always have the same bounds (0-100%) but a PDF that requires a strict integral of 1 has the issue that scales of broad and narrow distributions can be sharply different (such as the LWP plot below).

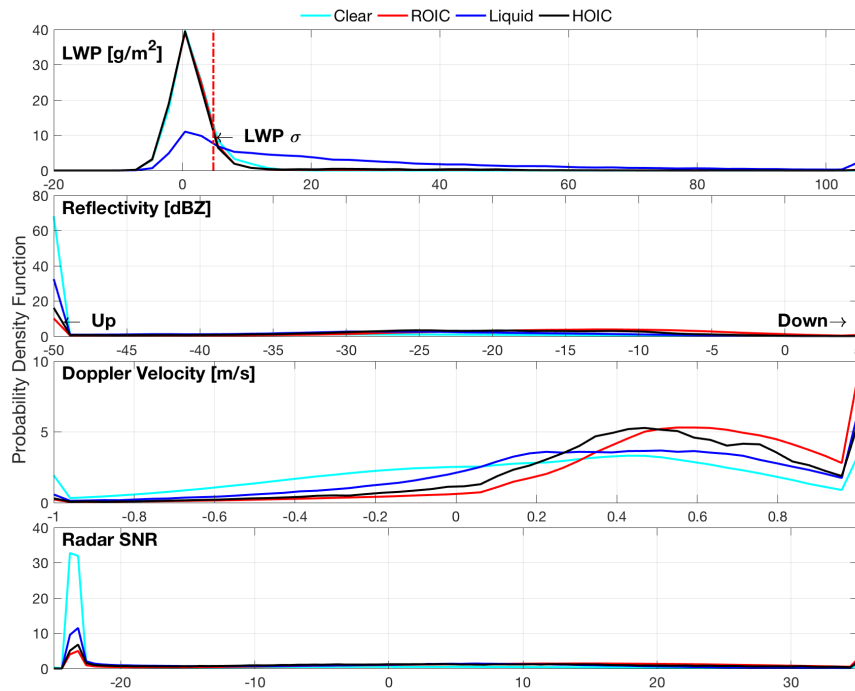

**Figure R4: Probability density functions (area normalized to 1) of the multisensor comparison presented in manuscript Figure 6.**



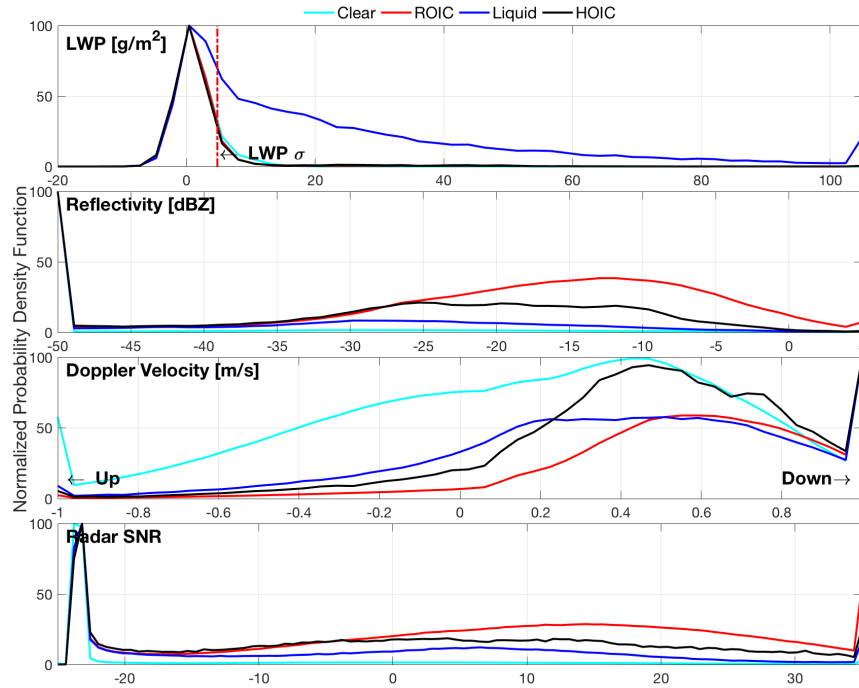

Figure R5: Normalized probability density function (normalized to the maximum value) of the multisensor comparison presented in manuscript Figure 6.

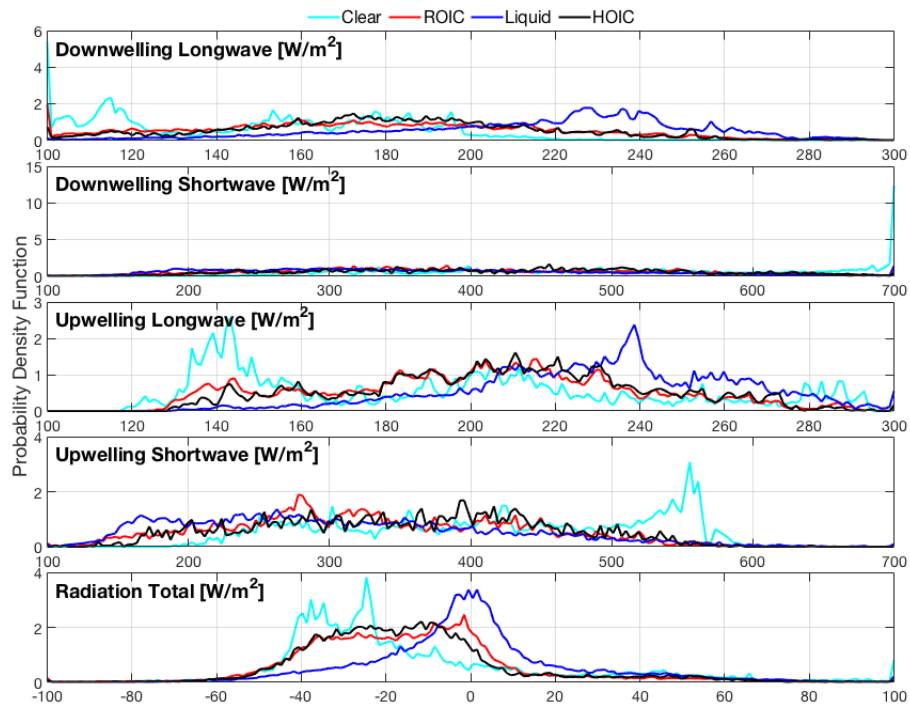

Figure R6: Probability density functions (area normalized to 1) of the radiation comparison presented in manuscript Figure 7.

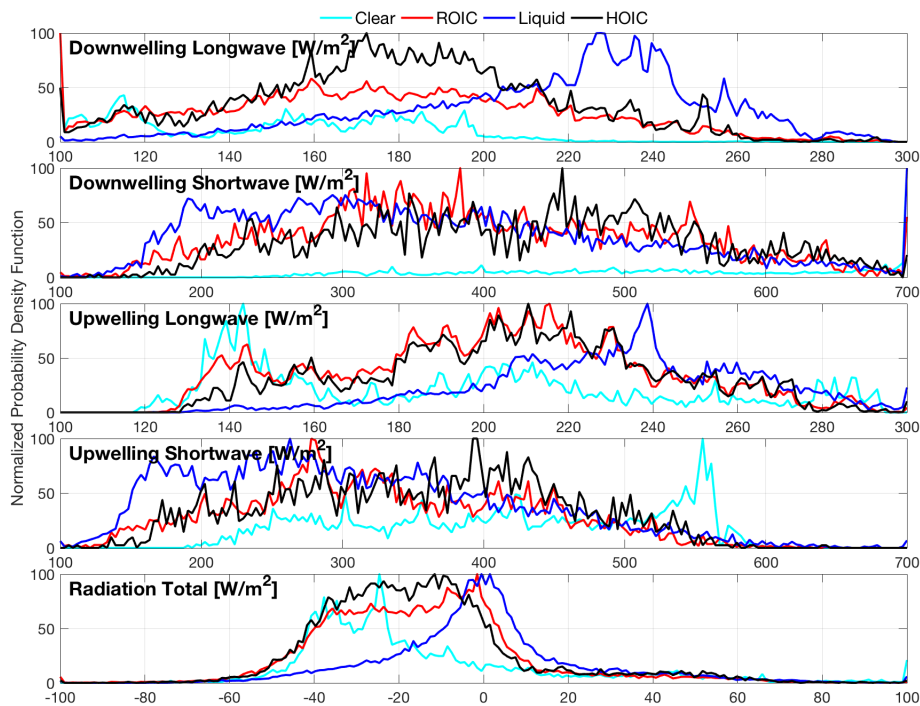

**Figure R7: Normalized probability density function (normalized to the maximum value) of the radiation comparison presented in manuscript Figure 7.**

- Major Comment 5: A comparison of absolute values from cited literature of downwelling radiative effects would be helpful.
  - The authors feel that this is beyond the scope of this work. The radiation data presented is not directly comparable to Miller et al. (2015), which conducted an analysis of cloud radiative forcing/effect at Summit from 2011 to 2013. Because Miller et al. (2015) calculated cloud radiative effect instead of using raw radiation measurements the results are not directly comparable. The difference in these analyses includes the difficult removal of clear air radiative effect that is, in the authors' opinion, well beyond the scope of this paper, which aims to demonstrate a lidar retrieval and classification method rather than diagnose the impact of clouds on the surface. This is planned for future analysis, however.
- Minor Comment 1: Insert “the” in the sentence: “...for example present in Antarctic”. (Page 2, Line 22)
  - The suggested change has been made. This change can now be found on page 1, line 22.
- Minor Comment 2: Could you give the actual optical thickness range for “high”? (Page 2, Line 37)
  - The authors have clarified in their footnote number 2 on page 2 that OD is considered high around OD 5.
- Minor Comment 3: Insert “a” in the sentence: “...is presented in Sect. 5 using co-located micro-pulse lidar...”. (Page 3, Line 22)
  - The suggested change has been made. It can now be found on page 3, line 23.
- Minor Comment 4: Volume depolarization is a function of observation angle. (Equation 7)
  - The suggested change has been made in Equation 7 (now 2) and Equation 8 (now 3) on page 5, lines 2 and 4.

- Minor Comment 5: The sentence “If randomly orientated ice crystals (ROIC) are observed, diattenuation will be strictly  $D = 0$  and the scattering Mueller matrix simplifies to a function of two elements, depolarization  $d$  and the volume backscatter coefficient  $\beta$ ” requires a citation as a non-obvious fact. (Page 6, Line 9)
  - A reference to Hayman and Thayer 2012 has been added on page 5, line 24.
- Minor Comment 6: Where is the problem, when the system dynamic range is in the “order of 4 to 5 orders of magnitude” and the two polarization signals can differ between “2 orders of magnitude” or “a factor of 2”? (Page 7, Line 30)
  - The issue here is detailed in Section 6.1. Large differences in dynamic range caused by polarization measurements fundamentally limit the altitude range of measurements (especially the perpendicular signal), i.e. there are too few photons in the perpendicular channel. In doing so, limiting the altitude range of measurements limits the validity of measurements when trying to use them to attribute other effects like cloud radiative effect. In the case of CAPABL’s photon counting channel, this limit causes a misrepresentation of approximately 1/3 of liquid clouds. In the case of analog detection, somewhere between 4 and 22% of high ice clouds are missed.
- Minor Comment 7: Incomprehensible sentence: “Depolarization effects related to saturation *couple* polarization measurements with terms in the SVLE like cloud base height, range, and optical thickness through signal intensity measurements.” What do you mean with “couple”? (Page 7, Line 30)
  - The authors have modified the original sentence to clarify the “coupling” is really a link between macro and microphysical properties. The new sentence reads: “Depolarization effects related to saturation link polarization measurements (microphysical properties) with properties like cloud base height, range, and optical thickness (macrophysical properties) that have a strong influence on the signal intensity of the measurements.” This change can be found on page 4, lines 2-4.
- Minor Comment 8: Why is the following sentence true? “...or the system is insensitive to orientation (as is the case within a few degrees of zenith or nadir) ...” (Page 3, Line 22)
  - Orientation is identified by the diattenuation flag. However, the measured diattenuation of the volume is the weighted average of the diattenuation of ROIC and HOIC, weighted by the occurrence frequency and scattering efficiency. ROIC should show zero diattenuation while HOIC show diattenuation that is a strict function of observation angle. The sensitivity of CAPABL to diattenuation peaks near 32 degrees (its current tilt angle) based on the strong increase of backscattering efficiency from oriented plates due to the corner reflection in ice. Given that HOIC are expected to be a small overall fraction of ice crystals, strong diattenuation (which can not necessarily be expected) or strong backscattering from HOIC are required to make the oriented fraction of the voxel dominate the randomly oriented fraction. Within a few degrees of zenith/nadial (for example the current tilt angle of CALIOP is 3 degrees) there is no strong diattenuation nor is there strong enhancement in backscattering efficiency from HOIC. However, identifications by instruments like CALIOP operating at an angle close to 0.3 degrees see enhanced scattering efficiency from HOIC as well, making the HOIC identification less about the observed diattenuation and more about signal strength. The authors have included this point in footnote 3 on page 7 to clarify the point while maintaining the focus of the sentence on the desired effect of saturation.
- Minor Comment 9: Change “...were accordingly changed...” to “...were changed accordingly”. (Page 8, Line 30)
  - The suggested change has been made and can now be found on page 8, line 4.
- Minor Comment 10: Change “...from vertical” to “from zenith”. (Page 9, Line 2)
  - The suggested change has been made and can be found on page 8, line 6.

- Minor Comment 11: What do you mean in the following sentence: “this allows 8 methods to invert and solve Eq. 4”? What are the consequences of having 8 different methods? (Page 9, Line 11)
  - The section has been modified to clarify that the 8 inversion methods facilitate flexibility when trying to retrieve cloud properties. If for example the parallel channel is subject to saturation, it need not necessarily be used to retrieve cloud properties. Likewise, for high thin clouds the perpendicular channel, which is typically too weak to make reliable measurements, need not be used. This can be found on page 8, line 18-19.
- Minor Comment 12: What are “like” polarizations? (Page 9, Line 18)
  - Data is taken by scanning polarizations as  $\theta_1, \theta_2, \theta_3, \theta_4, \theta_1, \dots$  and saved sequentially. This step simply unpacks raw data and splits the data stream. This sentence has been removed, as it doesn’t add clarity to the description.
- Minor Comment 13: Could you introduce an explanation of the “opposite sensitivity” of  $D_1$  and  $D_2$  to saturation for the readers that are unfamiliar with these kind of measurements? (Page 10, Line 3ff)
  - The sentence described has been changed to describe the opposite sensitivity as opposite sign value in bias. This can be found on page 6, line 29-30.
- Minor Comment 14: The following sentence is too vague: “As a final check, data that is classified as clear air must have substantial signal...”. Give the actual threshold. (Page 11, Line 5)
  - An additional sentence has been added clarifying that this classification scheme requires greater than 66% data availability from 1-2 km to be considered clear air. This can be found on page 10, lines 20-21.
- Minor Comment 15: Can you rewrite the paragraph beginning on Page 18, Line 14 to be clearer? Suggest using an illustrative example. (Page 18, Lines 14-19)
  - The authors agree with Reviewer 2 and have changed the paragraph to the following: “The data presented in Table 5 for December observations shows a large disagreement between CAPABL and the MPL (Table 5 cell D). Here CAPABL data fails QC filtering but MPL data is classified as clear air. The majority of the CAPABL observations filtered from the analysis are excluded because they do not meet the requirements of being a valid diattenuation observations. Either, the measurements do not pass the consistency test or have an unacceptably large error. Because the diattenuation filtering is unique to CAPABL, applying this exact filtering scheme to the MPL is impossible and CAPABL data is filtered more conservatively than the MPL given the same bounds for filters common to both instruments.” This text may now be found on page 17, lines 7-12.
- Minor Comment 16: Change “...has been pushed...” to “...has been interpolated...”. (Page 19, Line 14 and throughout the text)
  - The suggested change has been made of the following lines:
    - Page 15, line 12
    - Page 15, line 22
    - Page 18, line 14
- Minor Comment 17: Please clarify the following sentence: “The values given in Fig. 6 are filtered conservatively”. (Page 19, Line 33)
  - This sentence has been changed to indicate that conservative filtering is in the column data mask described in Section 3.3 and that this filtering results in approximately 5% of data that should be labeled “Obscured” that is allowed to be labeled “Clear Air”. This change can be found on page 18, line 30-32.
- Minor Comment 18: Can you refer to the Figure or Table for where you take the given percentages? (Page 21, Line 31ff)
  - The results in the section described now include a direct statement describing the origin of the results. The changes can be found on page 21, lines 15 and 19-20.

- Minor Comment 19: Provide a reference for the following sentence: “An analysis of ground and space-based observations of HOIC strongly indicates differences based on viewing orientation”. (Page 21, Line 18)
  - The sentence referenced has been removed in response to a comment by reviewer 3. As such, no citation has been included.

### Reviewer 3

- Major Comment 1: The comparison in Section 3.4 is rather pointless. It would be of greater scientific value to demonstrate the profiles from before and after the hardware update are consistent.
  - The comparison in Section 3.4 is intended as a direct example of the mechanism of saturation causing changes to the geophysical interpretation of our classification strategy. The primary goal of this comparison is not to describe the instrument upgrade and continued development work. Rather, it is to demonstrate the capability of the classification scheme of our current system setup. Furthermore, without the internal comparison between analog and photon counting, the comparisons of CAPABL's merged data product and the MPL data lacks critical context. Specifically how well CAPABL's own photon counting data matches the overall merged data product informs the expectation of how well a different system's photon counting data should match the overall data product.

The reviewer is correct that a full presentation of the entire data set for CAPABL would be of great scientific interest. Unfortunately, before July 2015, major research and development work prevented continuous measurements. In addition to the highlighted hardware changes, major changes were made to CAPABL's operational software and post processing methods to increase reliability and stability. This combined with major hardware failures in the winter, where the authors were unable to perform repairs, precluded high quality continuous measurements. Before July 2015, the operational state of CAPABL is not really comparable to its current operational state. The authors therefore concluded that such a comparison, while extremely interesting, is not possible. For these reasons, the authors feel that the comparison presented in Section 3.4 should remain as presented in the current version of the manuscript.
- Major Comment 2: Low altitude data looks untrustworthy? What is the system overlap and how do your data look?
  - Indeed, the low altitude regions are extremely difficult to measure accurately. This is part of the motivation of this study to push measurement reliability lower. Without the addition of a dedicated low altitude channel, which is impractical at Summit given the severe bandwidth limitations of data transfer from the site, the lowest altitudes are the hardest to measure well. The system overlap is shown below in Figure R8. This is calculated using the system parameters using standard ABCD matrices.

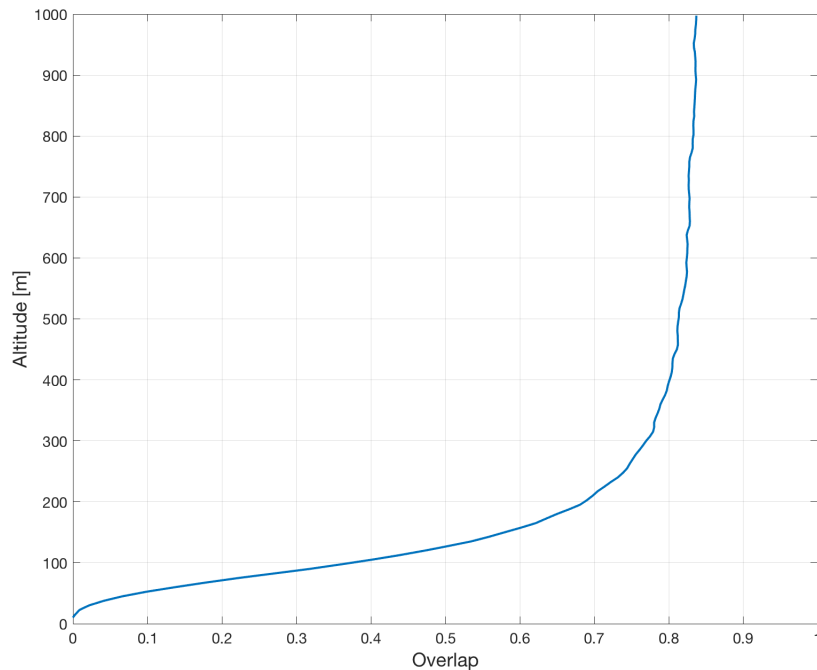

**Figure R8: CAPABL's overlap function as a function of range.**

In clear air, data above approximately 100 meters is quite reliable but not within clouds. Low fog or clouds almost always result in data clipping, which is flagged and removed by the Licel counting system and operational software. This is seen, for example, near noon in Figures 1 and 2 and from noon to 17 UTC in Figure 4. The data is flagged and removed that looks suspiciously like a low cloud but given this clipping, quantitative assessment is impossible. The Klett inversion used can be unreliable below approximately 100-150 meters as the system overlap correction becomes quite large. As a practical matter of the comparison with other sensors, the MPL has the same problem and is in fact worse because the lack of an analog detection channel and additional noise caused by signal induced noise resulting from the use of a transceiver design. The radar also has a blind zone due to its transceiver and pulse length resulting in data that is unreported. Finally, the obscuration flag in the column data product is a direct result of comparisons with MWR and trying to remove data that is clearly unreliable.

- Major Comment 3: I disagree with the statement that gluing is impractical. Why do the authors not use the method? Can you please show examples of glued profiles and compare findings to your method?
  - The authors' had intended to say that the use of gluing is impractical for our particular application of making observations at Summit and not as a general statement. The sentence has been revised to: "it is impractical to calculate gluing coefficients for CAPABL by atmospheric calibration as access to the CAPABL system is limited to once or twice a year". Of particular concern to the authors is the temporal variability of the gluing coefficients on the scale of weeks to months. The analysis of Newsom et al. (2009) indicates diurnal variability in particular. We are granted limited access to the system in the summer at the same time of year each year. As such, the authors have no ability to test any possible variability due to seasonality or background conditions (the sun is always above the horizon during our access period). This comment has been clarified within the text to specify that it is not a general statement but rather a limit of the

access of a remote site like Summit. With this inability to test temporal variability of the gluing coefficients sufficiently, we did not provide gluing products of any type out of an abundance of caution and resist the request to do so, due to our incomplete understanding of the temporal variation specific to CAPABL.

An additional concern for gluing at a site like Summit is the physical nature of the clouds. It is the authors' experience based on nearly 7 years of data from ICECAPS that clouds create a bimodal distribution in peak signal strength caused largely by optical thickness and base height. Low optically-thick liquid clouds almost exclusively cause extreme saturation in photon counting data and higher ice clouds are well represented in photon counting data. This behavior in addition to the issues highlighted in Section 4 force us to combine data at the product level instead of the raw signals. This is not burdensome in our case, as we already must combine data at the product level to perform the data merging for different polarization retrieval angles.

- Major Comment 4: Can you assume that the cloud phase classification scheme can be used for the MPL as well?
  - The authors based the development on the presented scheme for CAPABL on the literature for polarization lidars. This includes papers focused on analysis of data from MPLs such as those of Campbell et al. (2002) and Flynn et al. (2007). Additionally, the multisensor cloud phase classification paper by Shupe (2007) is also a major basis for this work. The applicable rules and processing steps described in Table 2 are thus expected to easily apply to the MPL. The corrections described by Campbell, including afterpulse calibration, overlap calibration, and saturation corrections, are also required for the MPL. Beyond the specifics of those calibration procedures, polarization analyses based on diattenuation measurements are not possible with the MPL. Subject to those differences, the assumption that this scheme would be valid was made given the literature. The results in Table 5 show encouraging signs that this scheme works well for the MPL (specifically high values in cells A and P) with the noted exception in the text that the MPL seems to miss cloud cases based on noisy data causing errors in the Klett inversion procedure.
- Major Comment 5: What is the error of  $d$  in the MPL?
  - The authors follow the derivation of depolarization given by Flynn et al. (2007) as the derivation we present assumes multiple strictly linear polarizations. Flynn et al. (2007) present a derivation for a standard 2-channel measurement beginning with a relevant version of the Stokes vector lidar equation. A rearrangement of their Eq. 1.5 yields:

$$d = \frac{2N_{\perp}}{2N_{\perp} + N_{Circ}}$$

The propagation of error of this expression for the error estimate is:

$$\sigma_d = 2 \sqrt{\frac{N_{Circ}^2 N_{\perp T} - N_{\perp}^2 N_{Circ T}}{(2N_{\perp} + N_{Circ})^4}}$$

We use the above expression to calculate error for the MPL where  $N_{\perp}$  and  $N_{Circ}$  are the number of background subtracted photons in the perpendicular and circular channels, respectively, and  $N_{\perp T}$  and  $N_{Circ T}$  and the total number of counts, including background, in the perpendicular and circular channels, respectively. From these expressions, the typical linear depolarization ratio is given by Flynn et al. (2007) in their Eq. 1.5 as:

$$\delta = \frac{d}{2-d} = \frac{\frac{2N_{\perp}}{2N_{\perp} + N_{Circ}}}{2 - \frac{2N_{\perp}}{2N_{\perp} + N_{Circ}}} = \frac{N_{\perp}}{N_{\perp} + N_{Circ}}$$

The propagation of error of this expression for the error estimate is:



$$\sigma_d = \sqrt{\frac{N_{circ}^2 N_{\perp T} - N_{\perp}^2 N_{CircT}}{(N_{\perp} + N_{Circ})^4}}$$

We calculate this error for every point for use in the classification described in Table 2.

- Major Comment 6: What did a comparison of the MPL and CAPABL look like before the update?
  - The authors have not compared the data from our developmental phase of CAPABL to MPL data in a complete fashion. The purpose of this paper is to demonstrate and test our current enhanced ability to measure Arctic clouds. Of particular interest here is the ability to test the classification scheme and compare it to other operational measurement systems on an operational basis. This ability has been developed and made more robust over several years of testing and development. The dates of comparison were chosen based largely on instrument uptime (CAPABL and other ICECAPS instruments shown in Figure R9 below), which has been dramatically improved for CAPABL from its original installation to present. As such, we consider the first date for comparisons to be July 2015. Before this, we do not possess CAPABL data that is adequately continuous to demonstrate our method.

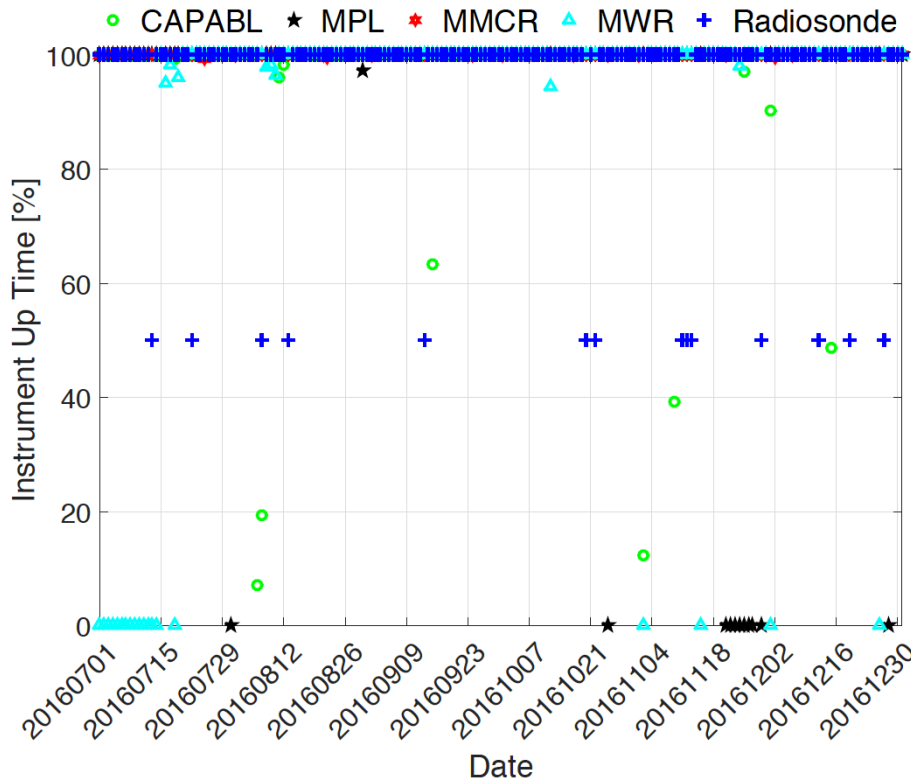

**Figure R9: ICECAPS sensor uptime for the period of comparison for manuscript Figure 6.**

- Major Comment 7: Demonstrate that the difference between the merged signals and the analog/photon counting is significant.
  - The authors agree with the reviewer that this is an important oversight in our manuscript. Section 6.1 has been modified to include the coverage from just orthogonal measurements (what would be available for just analog and photon counting data without the non-orthogonal components) compared to our full data retrieval. The text now reads: “At Summit, CAPABL provides a fully merged data product that covered 34% of the

column from 0 km to 8 km for July to December 2016. Using only orthogonal components from analog and photon counting results in only 25% coverage. In comparison to CAPABL, the MPL observed 19% of the column above Summit in summer (CAPABL observes 25% for the fully merged mask and only 18% for the orthogonal components) and 44% in winter (CAPABL observes 45% for the fully merged mask and only 31% for the orthogonal components)". This change may be found on page 20, lines 4-9.

- Major Comment 8: Why do you use median values and not mean? Is there a large difference?
  - Median values of the radiation data are presented, as they are consistent with the presentation of the data as a cumulative distribution function. The qualitative results are unchanged using the mean values.
- Minor Comment 1: Recommend omitting the first introduction paragraph. Recommend focusing more on lidar system.
  - The authors agree with the reviewer that the focus of the paper should be on lidar measurements and demonstrating the described non-orthogonal retrievals. The authors do, however, have a strong preference to leave the first paragraph of the introduction. We intend to use it as scientific motivation for making measurements of low-level clouds in the Arctic. Without such motivation, the authors fear this work lacks specific impetus to fill observational gaps in the Arctic.
- Minor Comment 2: The statement on Page 3, lines 5-9 needs to be discussed in more detail or citation provided.
  - References to Biele et al. 2000, Alvarez et al. 2006, and Hayman and Thayer 2009 have been added here. This change can be found on page 3, line 6-7.
- Minor Comment 3: Please include "e.g." before the citation (Page 6, Line 16)
  - The suggested change has been made and can be found on page 6, line 2.
- Minor Comment 4: How were the transmitter and receiver polarization purity measured? (Page 7, Line 10)
  - The measurements specified have been performed as follows. The transmitter is measured using the following optical setup: Laser source → polarizer → transmitter optics → analyzer → detector. The polarizer and analyzer are both Glan-Taylor polarizers as specified in Table 1 caption. The receiver is done similarly: Laser source → polarizer → receiver optics → analyzer → detector. The full Stokes vector of the laser source after the polarizer and after the transmitter/receiver optics was measured. The overall degree of polarization was measured before and after to determine rejection/purity. After this initial step, this is verified with the full operational system using clear air atmospheric returns. CAPABL's analyzer uses a liquid crystal variable retarder combined with a quarter wave plate to make a variable rotator whose voltage can be scanned in clear air periods to map voltage values to polarization orientations. These scans are used to verify polarization purity at several altitudes both in the boundary layer and above in the lower stratosphere. The given values are tested each time the system is visited by the authors and verified to be consistent from initial installation in 2015 to current. An example is given in Figure R10 using both of CAPABL's lasers, which are cross-polarized. The voltage of the max/min of each profile is determined in this way as well as the 45 degree points where the profiles overlap. Note that the below profiles are taken during a period of mostly clear air for the gray lines and optically thin blowing snow for the black lines. The overall minimum measurable depolarization is approximately 1% in clear air. One final note to make is that this scan is run at relatively coarse resolution in voltage to speed it for initial polarization determination. Higher resolution scans are run to set actual values once the broad structure is confirmed. This higher resolution is needed near the minima, which are very sharp features.

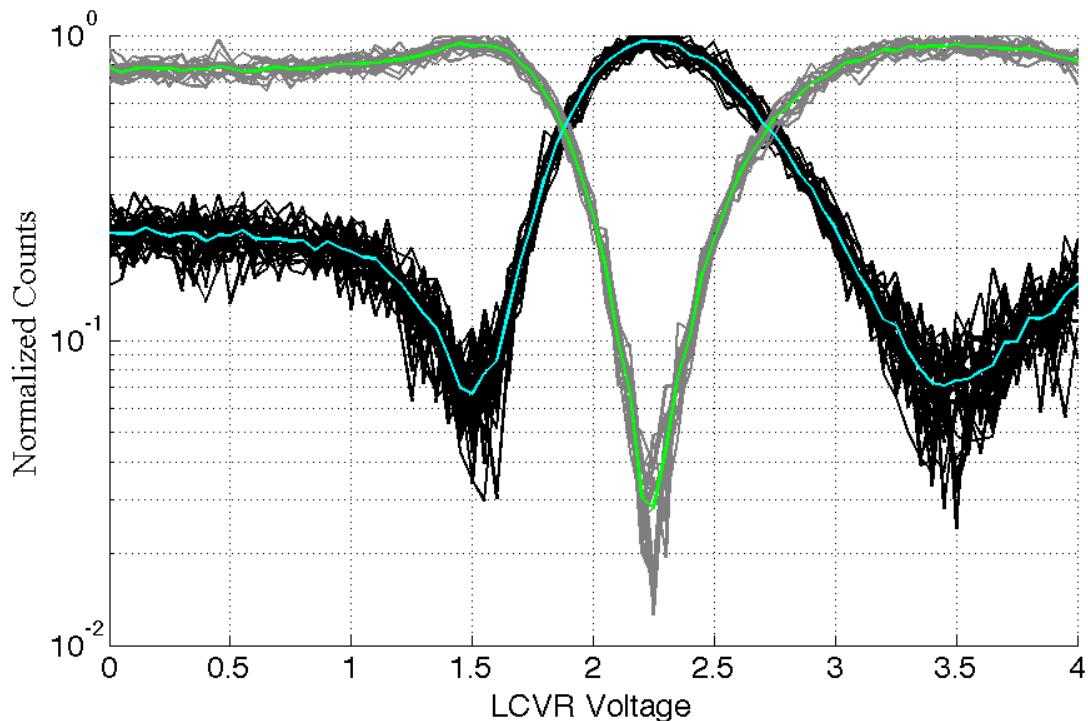

**Figure R10: Liquid crystal variable rotator (LCVR) scans performed by CAPABL. The voltage applied is not linearly related to the analyzer polarization angle. The full system minimum observable depolarization is determined in this fashion after testing the receiver and transmitter individually.**

- Do you do the comparison of LWP when more than 1 cloud layer is observed? What would you expect with a mixed phase layer? (Minor 5 on Page 19, Lines 5-8 and Line 10)
  - Yes, the comparison of LWP is done on all data. The process used to retrieve LWP requires 2 radiometers to measure emission from the atmosphere in 3 different microwave bands. Multi-layer and single layer cloud emission is not intrinsically a problem to measure as long as the emission is not scattered by small water droplets. Given the low optical depth in the selected microwave bands, this is a negligible quantity for almost all cases. However, Pettersen et al. (2016) and (2017), for example, show the higher order effects of scattered surface emission caused by larger ice particles within deep ice layers causing non-zero liquid water path observations that actually lack liquid water. The authors hypothesize that this is one reason that ROIC/HOIC layers can have non-zero LWP as shown in Figure 6. Analysis of this impact is planned for future work.

Pettersen, et al., “Microwave signatures of ice hydrometeors from ground-based observations above Summit, Greenland”, ACP, 2016, doi: 10.5194/acp-16-4743-2016

Pettersen, et al., “Precipitation regimes over central Greenland inferred from 5 years of ICECAPS observations”, ACPD, <https://doi.org/10.5194/acp-2017-857>, in review, 2017.

- Minor Comment 6: HOIC observations are not shown in the paper and the entire section should be omitted (Minor 6 on Page 21, Lines 18-24)
  - The suggested change has been made.

# Improved Cloud Phase Determination of Low Level Liquid and Mixed Phase Clouds by Enhanced Polarimetric Lidar

Robert A. Stillwell<sup>1,2</sup>, Ryan R. Neely III<sup>3,4</sup>, Jeffrey P. Thayer<sup>1</sup>, Matthew D. Shupe<sup>5,6</sup>, and David D. Turner<sup>6</sup>

<sup>1</sup>Aerospace Engineering Sciences, University of Colorado at Boulder, ECNT 320, 431 UCB, University of Colorado, Boulder, CO 80309.

<sup>2</sup>Advanced Study Program, National Center for Atmospheric Research, 3450 Mitchell Lane, Bldg 1, CO 80301, USA.

<sup>3</sup>School of Earth and Environment, University of Leeds, LS2 9JT, Leeds, UK.

<sup>4</sup>National Centre for Atmospheric Science, University of Leeds, LS2 9JT, Leeds, UK.

<sup>5</sup>Cooperative Institute for Research in Environmental Sciences, University of Colorado at Boulder, 216 UCB, University of Colorado, Boulder, CO 80309.

<sup>6</sup>Earth System Research Laboratory, National Oceanic and Atmospheric Administration, 325 Broadway, Boulder, CO 80309.

*Correspondence to:* Robert Stillwell (robert.stillwell@colorado.edu)

**Abstract.** The unambiguous retrieval of cloud phase from polarimetric lidar observations is dependent on the assumption that only cloud scattering processes affect polarization measurements. A systematic bias of the traditional lidar depolarization ratio can occur due to a lidar system's inability to accurately measure the entire backscattered signal dynamic range, and these biases are not always identifiable in traditional polarimetric lidar systems. This results in a misidentification of liquid water in clouds as ice, which has broad implications on evaluating surface energy budgets. The Clouds Aerosol Polarization and Backscatter Lidar at Summit, Greenland employs multiple planes of linear polarization, and photon counting and analog detection schemes, to self evaluate, correct, and optimize signal combinations to improve cloud classification. Using novel measurements of diattenuation that are sensitive to both horizontally oriented ice crystals and counting system non-linear effects, unambiguous measurements are possible by over constraining polarization measurements. This overdetermined capability for cloud phase determination allows for system errors to be identified and quantified in terms of their impact on cloud properties. It is shown that lidar system dynamic range effects can cause errors in cloud phase fractional occurrence estimates on the order of 30% causing errors in attribution of cloud radiative effects on the order of 10%-30%. This paper presents a method to identify and remove lidar system effects from atmospheric polarization measurements and uses co-located sensors at Summit to ~~validate~~ evaluate this method. Enhanced measurements are achieved in this work with non-orthogonal polarization retrievals as well as analog and photon counting detection facilitating a more complete attribution of radiative effects linked to cloud properties.

## 1 Introduction

Changing Arctic conditions lead to many changes in regional surface energy and mass budgets, which have a profound impact on humans outside the region (Curry et al., 1996; Hansen et al., 2011). Locked within the Greenland Ice Sheet (GrIS) is the the potential for sea level rise on the order of 7 m (Gregory et al., 2004), of which approximately 25 mm has already been  
5 contributed from 1900 to present with an increased rate of mass loss in recent years (Kjeldsen et al., 2015). Several studies have linked variability of the surface energy and mass budgets to cloud properties and in particular low-level, liquid-only and mixed-phase<sup>1</sup> clouds (Bennartz et al., 2013; Sherwood et al., 2014; Miller et al., 2015; Tan et al., 2016; Miller et al., 2017). The climate is sensitive to Arctic cloud macro and microphysical properties, yet substantial gaps are present in understanding of fundamental cloud processes due to a limited set of cloud observations to which model results may be compared (Curry  
10 et al., 1996; Cesana et al., 2012; Morrison et al., 2012; Bennartz et al., 2013; Van Tricht et al., 2016).

Understanding the nature of liquid-only and mixed-phase clouds is important for understanding the surface energy budget. Mixed-phase clouds show remarkable persistence in the Arctic even though the liquid phase is colloiddally unstable, possibly persisting for days to weeks given the correct synoptic conditions (Shupe et al., 2006). Furthermore, though liquid-only and mixed-phase clouds can be found up to heights of approximately 6 km above mean sea level (amsl) in the Arctic, they have  
15 been found by many to be predominately low-lying with high optical thickness<sup>2</sup> (Curry et al., 1996; Intrieri et al., 2002; Turner, 2005; Shupe et al., 2006; de Boer et al., 2009; Shupe, 2011; Shupe et al., 2013). Such characteristics make these clouds particularly hard to measure accurately from both the ground and space. Shupe et al. (2006) further notes that mixed-phase clouds are an understudied component of global cloudiness resulting in their poor representation in models at all scales, a finding supported by others including Cesana et al. (2012); Pithan et al. (2014); Kay et al. (2016). The focus of this work is the  
20 interpretation of ground based polarimetric lidar measurements of Arctic liquid-only and mixed-phase clouds and assessing systematic measurement biases that inhibit their proper identification. While the scope of this work is confined to the Arctic, this work is informative to measurements of similar cloud types, for example present in [the](#) Antarctic.

Polarimetric lidar systems are widely deployed to the polar regions to measure cloud properties. Nott and Duck (2011) and references therein summarize more than a dozen lidar deployment sites in the Arctic and Antarctic. Polarimetric lidar data  
25 is particularly useful for cloud and aerosol studies to determine properties such as cloud phase, cloud base height, particle orientation, and for broad aerosol classifications (Schotland et al., 1971; Measures, 1984; Sassen, 1991; Kaul et al., 2004; Fujii and Fukuchi, 2005; Weitkamp, 2005; Freudenthaler et al., 2009; Hayman and Thayer, 2012; Groß et al., 2015). The utility of lidar observations can be enhanced by using complementary measurements that grant a more complete perspective such as cloud radars, microwave radiometers, and radiosondes as done for programs like the Surface Heat Budget of the Arctic  
30 Ocean (SHEBA) (Shupe et al., 2006), the Department of Energy Atmospheric Radiation Measurement (ARM) program's

---

<sup>1</sup>This work uses the definition of mixed-phase presented by Shupe et al. (2008) where a mixed phase cloud is defined as a cloud system containing both liquid and ice water that interact via microphysical processes. The complete system must contain both liquid and ice water but no requirement is made on the exact location or quantity of either phase.

<sup>2</sup>In this manuscript, high is taken relative to ice-only clouds existing in the same region and not to liquid clouds existing in the mid-latitude or tropical regions. [Here high optical thickness for liquid water clouds are on the order of OD 5 whereas ice is on the order of OD 1.](#)

atmospheric observatories (Verlinde et al., 2016), and Mixed Phase Arctic Clouds Experiment (MPACE) (Verlinde et al., 2007). Despite its utility, polarimetric lidar has limitations. Among them is the stringent requirement of linear signal operation over a large dynamic range. If not properly designed or considered, measurements can be misinterpreted casting doubt on critical measurements like cloud phase (Hayman and Thayer, 2009; Liu et al., 2009; Neely et al., 2013). For example, traditional two-channel orthogonal polarization measurements using co-polarized and cross-polarized signals can not unambiguously separate systematic polarization effects and geophysical effects (Biele et al., 2000; Alvarez et al., 2006; Hayman and Thayer, 2009). These measurement errors result in cloud phase misidentification, which, in turn, introduce unquantified errors into observationally based understanding of key cloud and radiative processes. Observations by lidar of Arctic liquid-only and mixed-phase clouds in particular are challenging due to their high optical thicknesses, relative to ice-only clouds, and low-lying altitude, which demands large system dynamic ranges.

This work focuses on novel polarimetric lidar measurements made at Summit, Greenland ( $72^{\circ}35'46.4'' N$ ,  $38^{\circ}25'19.1'' W$ ,  $3212 m \text{ amsl}$ ) as part of the Integrated Characterization of Energy, Clouds, Atmospheric State, and Precipitation at Summit (ICECAPS) program outlined by Shupe et al. (2013). The primary measurements to be presented are taken from the Clouds Aerosol Polarization and Backscatter Lidar (CAPABL), which was originally designed to measure polarization properties of clouds with emphasis on identifying horizontally oriented ice crystals (HOIC) and cloud phase (Neely et al., 2013). Analysis of seven years of polarimetric lidar data observed by CAPABL has highlighted several uncertainties and biases that can cause errors in the interpretation of geophysical retrievals of cloud phase, primarily caused by systemic limitations to adequately observe the dynamic range in backscattered signals from clouds.

The outline of this paper is as follows. The measurement theory, upon which the retrievals within CAPABL's automatic processing are based, is given in Sect. 2. An overview of the data collection and processing is provided in Sect. 3 with emphasis on geophysical retrievals and potential errors caused by limited signal dynamic range. Several retrieval methods are presented and combined into a best estimate cloud identification in Sect. 4. A [validation-comparison](#) of the best estimate data product is presented in Sect. 5 using [a](#) co-located micro-pulse lidar (MPL), microwave radiometer (MWR), millimeter cloud radar (MMCR), and broadband radiation measurement suite. Finally, this paper concludes with a discussion in Sect. 6 describing applicability of the presented observational methodology to other polar lidar measurements and quantification of lidar classification errors on radiation budget estimates.

## 2 Measurement Theory

[Observed polarization properties are a function of atmospheric scattering, optical system setup, and recording systems. For example, traditional two-channel polarization systems can not unambiguously measure atmospheric depolarization without additional information. Separating atmospheric depolarization from systematic effects is non-trivial.](#) Alvarez et al. (2006) [show, for example, how to calibrate differential detector sensitivity and receiver cross-talk, while](#) Hayman and Thayer (2009) [show how to remove depolarization effects caused by receiver optical retardance and scattering. However, recording systems that are subject to saturation, or underrepresentation of signal strength compared to incident irradiance, can also cause depolarization](#)

ratio effects, which are not constant in range and can not be calibrated using methods like that presented in Alvarez et al. (2006) or Hayman and Thayer (2009). Depolarization effects related to saturation link polarization measurements (microphysical properties) with properties like cloud base height, range, and optical thickness (macrophysical properties) that have a strong influence on the signal intensity of the measurements. Given the tight link between macro and microphysical properties, optical system setup, and recording systems, adding more polarization measurements to the traditional 2 polarization lidar systems can greatly enhance the utility of lidar polarization measurements. The cost of this additional utility is the added formalism needed to represent the vector nature of light.

## 2.1 Polarization Measurements and Mueller Formalism

Using a vector description of light allows one to describe scatterers by how they alter polarization states of light as well as how much energy is redirected. Hayman and Thayer (2012) use polar decomposition of Mueller matrices to define the Stokes vector lidar equation (SVLE), which links transmitted and received polarization states of light to physical attributes of the scatterers. This equation forms the basis of CAPABL's polarization retrievals and is given in Eq. 1

$$\bar{N}(R) = \bar{O}\bar{M}_{R_x}(\bar{k}_s) \left[ \left( G(R) \frac{A}{R^2} \Delta R \right) \bar{T}_{atm}(\bar{k}_s, R) \bar{F}(\bar{k}_i, \bar{k}_s, R) \bar{T}_{atm}(\bar{k}_i, R) \bar{M}_{T_x}(\bar{k}_i) \bar{S}_{T_x} + \bar{S}_B(\lambda_{R_x}) \right] \quad (1)$$

where  $\bar{N}$  is vector of photon counts for each polarization channel as a function of range,  $R$ ,  $\bar{O}$  is the observation matrix describing each polarization observation channel,  $\bar{M}_{T_x}$  and  $\bar{M}_{R_x}$  are the Mueller matrices describing the transmitter and receiver, which are functions of the incident and scattered wave vector  $\bar{k}_i$  and  $\bar{k}_s$ , respectively,  $G$  is the physical overlap function of the transmitter and receiver,  $A$  is the telescope area,  $\Delta R$  is the range resolution of the counting system,  $\bar{T}_{atm}$  is the one way transmission Mueller matrix either between the transmitter and the scatterer or between the scatterer and the receiver,  $\bar{F}$  is the scattering phase matrix, which is a function of both transmitted and received wave vectors and range,  $\bar{S}_{T_x}$  is the Stokes vector of the light from the laser source, and  $\bar{S}_B$  is the Stokes vector of the background condition which is a function of the receiver wavelength window,  $\lambda_{R_x}$ . The terms of the equation are organized by their functional order because matrix operations do not generally commute. The observation matrix is also included because only intensity can be measured directly with the full Stokes vector determined through measurement with particular configurations of the analyzer (Hayman and Thayer, 2012). For more information on the SVLE and its derivation, the reader is referred to Hayman and Thayer (2012).

Elements of  $\bar{F}$  can be used to describe physical attributes of scatterers beyond simple scattering cross section (Van De Hulst, 1957; Mishchenko and Hovenier, 1995; Kaul et al., 2004). The reader is referred to Neely et al. (2013) who describe the polarization retrievals and the physical interpretation of the elements CAPABL measures in detail. ~~Here the~~ The retrieval presented by Neely et al. (2013) is generalized here by relaxing the assumption made in that work that the receiver orientations (linear polarization angles), here given the variable name  $\theta_{i_s}$ , are fixed at  $0^\circ$ ,  $45^\circ$ , and  $90^\circ$   $\theta_1 = 0^\circ$ ,  $\theta_2 = 45^\circ$ , and  $\theta_3 = 90^\circ$  relative to the output linear polarization. A full derivation of this generalization is given in Appendix A. The results are given here without further comment.

Volume depolarization, hereafter referred to as depolarization,

$$d(R) - 1 = \frac{F_{33}(R)}{F_{11}(R)} = \frac{(\cos(2\theta_3) - \cos(2\theta_2))N_1(R) + (\cos(2\theta_1) - \cos(2\theta_3))N_2(R) + (\cos(2\theta_2) - \cos(2\theta_1))N_3(R)}{\sin(2\theta_2 - 2\theta_3)N_1(R) + \sin(2\theta_3 - 2\theta_1)N_2(R) + \sin(2\theta_1 - 2\theta_2)N_3(R)} \quad (2)$$

and volume diattenuation, hereafter referred to as diattenuation

$$D(R) = \frac{F_{12}(R)}{F_{11}(R)} = \frac{(\sin(2\theta_3) - \sin(2\theta_2))N_1(R) + (\sin(2\theta_1) - \sin(2\theta_3))N_2(R) + (\sin(2\theta_2) - \sin(2\theta_1))N_3(R)}{\sin(2\theta_2 - 2\theta_3)N_1(R) + \sin(2\theta_3 - 2\theta_1)N_2(R) + \sin(2\theta_1 - 2\theta_2)N_3(R)} \quad (3)$$

5 can be expressed in terms of arbitrary observation angles,  $\theta_i$ , assuming the condition  $\zeta \neq 0$ .  $\zeta$ , defined as

$$\zeta = \cos(2\theta_3)(\sin(2\theta_2) - \sin(2\theta_1)) + \cos(2\theta_1)(\sin(2\theta_3) - \sin(2\theta_2)) + \cos(2\theta_2)(\sin(2\theta_1) - \sin(2\theta_3)), \quad (4)$$

is the common denominator of a fraction that results from the inversion procedure described in Appendix A. For CAPABL  $\zeta \approx -2$  calculated from receiver polarizations via atmospheric calibration performed for each measurement.

10 The expressions given in Eq. 2 and Eq. 3 are generalizations of the equations presented by Neely et al. (2013) that assume fixed orthogonal receiver polarization angles. The diattenuation equations presented by Neely et al. (2013) in their Eq. 7 and Eq. 20 can be recovered from our Eq. 3 by using  $\theta_1 = 45^\circ$ ,  $\theta_2 = -45^\circ$ , and  $\theta_3 = 0^\circ$  for their Eq. 7 and  $\theta_1 = 45^\circ$ ,  $\theta_2 = -45^\circ$ , and  $\theta_3 = \pm 90^\circ$  for their Eq. 20. The depolarization term presented by Neely et al. (2013) in their Eq. 8 can be recovered with either set of angles from our Eq. 2. For clarity, retrievals performed with equations from Neely et al. (2013) are referred to as traditional or orthogonal as the polarizations used are orthogonal in Poincare space. The retrievals using Eq. 2 and 3 are referred to as non-orthogonal as they require no such assumption.

15 From this general form given in Eq. 1, the number of photons to be observed in any arbitrary linear polarization channel can be derived. Assuming that CAPABL: 1) emits a linear polarized signal at angle  $\phi$ , yielding the simplification-

$$\bar{M}_{T_x}(\bar{k}_i) \bar{S}_{T_x} = \begin{bmatrix} 1 & \cos(2\phi) & \sin(2\phi) & 0 \end{bmatrix}^T,$$

20 2) only measures linear polarized signal at angle  $\theta$  from the reference transmit polarization, (Eq. 15 with  $A(\Gamma_{wp}) = \bar{M}_{R_x}(2\theta)$ ) yielding the simplification

$$\bar{M}_{R_x}(\bar{k}_s) = \frac{1}{2} \begin{bmatrix} 1 & \cos(2\theta) & \sin(2\theta) & 0 \\ 1 & \cos(2\theta) & \sin(2\theta) & 0 \\ 0 & 0 & 0 & 0 \\ 0 & 0 & 0 & 0 \end{bmatrix},$$



and 3) using the definition of the backscattering phase matrix

$$\bar{\bar{F}}(\bar{k}_i, -\bar{k}_i, R) = \begin{bmatrix} F_{11}(R) & F_{12}(R) & 0 & 0 \\ F_{12}(R) & F_{22}(R) & 0 & 0 \\ 0 & 0 & F_{33}(R) & F_{34}(R) \\ 0 & 0 & F_{34}(R) & F_{44}(R) \end{bmatrix} \quad (5)$$

the number of photons to be observed in any arbitrary linear polarization channel is given in Eq. 6 as

$$N_M(R) = \xi(R) [F_{11}(R) + \cos(2\theta) F_{12}(R) + \cos(2\phi) (F_{12}(R) + \cos(2\theta) F_{22}(R)) + \sin(2\theta) \sin(2\phi) F_{33}(R)]. \quad (6)$$

5 Here, all constant terms of Eq. 1, which will cancel when taking signal ratios, are lumped into the term  $\xi(R)$  such as the measurement solid angle, geometric overlap, range resolution, and atmospheric transmission.

The number of measured photons incident upon the photodetector,  $N_M(R)$ , is a function of transmitted and received polarization angle  $\phi$  and  $\theta$ , respectively, and is related to the scattering phase matrix terms,  $F_{11}(R)$ ,  $F_{12}(R)$ ,  $F_{22}(R)$ , and  $F_{33}(R)$ , which are all functions of range. For CAPABL,  $\phi = 45^\circ$ ; applying this constraint to Eq. A4 cancels the functional dependency on  $F_{22}(R)$  by design. Thus, using three distinct receiver polarization channels:  $\theta_1$ ,  $\theta_2$ , and  $\theta_3$ , one can create a set of three simultaneous equations which can be inverted to calculate the Mueller matrix terms of interest that describe backscattering coefficient ( $F_{11}$ ), volume depolarization ( $F_{33}/F_{11}$ ), and volume diattenuation ( $F_{12}/F_{11}$ ). This set of equations is given in Eq. A5

$$\begin{bmatrix} N_1(R) \\ N_2(R) \\ N_3(R) \end{bmatrix} = \xi(R) \begin{bmatrix} 1 & \cos(2\theta_1) & \sin(2\theta_1) \\ 1 & \cos(2\theta_2) & \sin(2\theta_2) \\ 1 & \cos(2\theta_3) & \sin(2\theta_3) \end{bmatrix} \begin{bmatrix} F_{11}(R) \\ F_{12}(R) \\ F_{33}(R) \end{bmatrix} \rightarrow \bar{N} = \bar{A}\bar{F}. \quad (7)$$

15 The general matrix inverse of  $\bar{A}$  is given in Eq. 8 as

$$\bar{A}^{-1} = \frac{1}{\zeta} \begin{bmatrix} \sin(2\theta_2 - 2\theta_3) & \sin(2\theta_3 - 2\theta_1) & \sin(2\theta_1 - 2\theta_2) \\ \sin(2\theta_3) - \sin(2\theta_2) & \sin(2\theta_1) - \sin(2\theta_3) & \sin(2\theta_2) - \sin(2\theta_1) \\ \cos(2\theta_2) - \cos(2\theta_3) & \cos(2\theta_3) - \cos(2\theta_1) & \cos(2\theta_1) - \cos(2\theta_2) \end{bmatrix}. \quad (8)$$

Note that the matrix  $\bar{A}$  and the matrix inverse  $\bar{A}^{-1}$  are not functions of range but only of the selected receiver polarizations. The term

$$\zeta = \cos(2\theta_3)(\sin(2\theta_2) - \sin(2\theta_1)) + \cos(2\theta_1)(\sin(2\theta_3) - \sin(2\theta_2)) + \cos(2\theta_2)(\sin(2\theta_1) - \sin(2\theta_3)), \quad (9)$$

20 is introduced in Eq. 8 as a constraint on the validity of the inversion where  $\zeta = 0$  results in a degenerate inversion because of receiver polarization selection. This happens for example when two angles are equal or  $180^\circ$  separated.

~~Volume depolarization, hereafter referred to as depolarization,~~

$$d(R, \theta_i) = \frac{F_{33}(R, \theta_i)}{F_{11}(R, \theta_i)} = \frac{(\cos(2\theta_3) - \cos(2\theta_2))N_1(R) + (\cos(2\theta_1) - \cos(2\theta_3))N_2(R) + (\cos(2\theta_2) - \cos(2\theta_1))N_3(R)}{\sin(2\theta_2 - 2\theta_3)N_1(R) + \sin(2\theta_3 - 2\theta_1)N_2(R) + \sin(2\theta_1 - 2\theta_2)N_3(R)} \quad (10)$$

~~and volume diattenuation, hereafter referred to as diattenuation,~~

$$D(R, \theta_i) = \frac{F_{12}(R, \theta_i)}{F_{11}(R, \theta_i)} = \frac{(\sin(2\theta_3) - \sin(2\theta_2))N_1(R) + (\sin(2\theta_1) - \sin(2\theta_3))N_2(R) + (\sin(2\theta_2) - \sin(2\theta_1))N_3(R)}{\sin(2\theta_2 - 2\theta_3)N_1(R) + \sin(2\theta_3 - 2\theta_1)N_2(R) + \sin(2\theta_1 - 2\theta_2)N_3(R)} \quad (11)$$

## 5 2.2 Retrieval Assumptions

By assuming the more general form of the backscattering phase matrix, Eq. A3, which allows for horizontal orientation of scatterers as opposed to only random orientation, and observing scatterers in an off-zenith direction (for CAPABL the tilt angle from zenith is  $32^\circ$ ), no ambiguity arises in the interpretation of depolarization measurements as seen for example by Thomas et al. (1990) or Winker et al. (2009) where low depolarization, typically associated with liquid, from ice is observed from organized specular reflections off of HOIC. Equations 2 and 3 are valid for randomly or horizontally oriented axially symmetric scatterers. If randomly orientated ice crystals (ROIC) are observed, diattenuation will be strictly  $D = 0$  and the scattering Mueller matrix ~~simplifies~~ simplifies to a function of two elements, depolarization  $d$  and the volume backscatter coefficient  $\beta$  (Hayman and Thayer, 2012). This form of the backscattering phase matrix is consistent with the works of Mishchenko and Hovenier (1995); Flynn et al. (2007); Gimmetstad (2008); Hayman and Thayer (2009), and Hayman and Thayer (2012).

Traditional volume depolarization ratio, hereafter referred to as depolarization ratio, measurements are made by assuming random orientation of particles and using only two measurements of the polarization of the backscattered signal, one that is linear and parallel to the outgoing laser polarization and one that is linear and perpendicular to the outgoing laser polarization. ~~e.g.~~ e.g. Schotland et al. (1971); Sassen (1991); Mishchenko and Hovenier (1995); Gimmetstad (2008); Hayman and Thayer (2012). Depolarization,  $d$ , and depolarization ratio,  $\delta$ , can be related but are not equivalent. Depolarization is an element of the Mueller formalism and can be measured with any set of 2 polarizations (assuming randomly oriented particles), and the depolarization ratio is often related to the phase of atmospheric scatterers but is only measured with parallel and perpendicular polarizations. They are related as

$$\delta(R) = \frac{N_{0\perp}(R)}{N_{0\parallel}(R)} = \frac{d(R)}{2 - d(R)} \quad (12)$$

where  $N_{0\perp}$  is the number of photons (or equivalently the photon arrival rate) at the detector surface in the perpendicular channel as a function of range, and  $N_{0\parallel}$  is the number of photons (or equivalently the photon arrival rate) at the detector surface in the parallel channel as a function of range. Measuring orthogonal polarizations imposes a stringent requirement on a lidar system that can be lessened by using the more general form given in Eq. 2.

Implicit in the development of the SVLE, and most lidar retrievals, is the assumption that the observed signal is linearly related to irradiance of light at the receiver. For targets with low depolarization ratios like liquid and clear air, the signal

dynamic range in the parallel and perpendicular channels can be dramatically different. A depolarization ratio of 1% would indicate the two signals would be different by 2 orders of magnitude whereas a depolarization ratio of 50% would indicate the two signals would be different by a factor of 2. This difference is of practical concern as most observing systems have limited dynamic range, on the order of 4 to 5 orders of magnitude.

5 ~~The expressions given in Eq. 2 and Eq. 3 are generalizations of the equations presented by that assume fixed orthogonal receiver polarization angles. The diattenuation equations presented by in their Eq. 7 and Eq. 20 can be recovered from our Eq. 3 by using  $\theta_1 = 45^\circ$ ,  $\theta_2 = -45^\circ$ , and  $\theta_3 = 0^\circ$  for their Eq. 7 and  $\theta_1 = 45^\circ$ ,  $\theta_2 = -45^\circ$ , and  $\theta_3 = \pm 90^\circ$  for their Eq. 20. The depolarization term presented by in their Eq. 8 can be recovered with either set of angles from our Eq. 2. For clarity, retrievals performed with equations from are referred to as traditional or orthogonal as the polarizations used are orthogonal in Poincare~~  
10 ~~space. The retrievals using Eq. 2 and 3 are referred to as non-orthogonal as they require no such assumption.~~

Finally, Eqs. 2 and 3 are also derived on the strict assumption that the lidar system emits a linear polarization and measures only linear polarizations (displaying no systematic retardance for example). These assumptions have been questioned for some optical systems, e.g. Hayman and Thayer (2009) or Di et al. (2016), but have been directly measured for CAPABL. CAPABL has a transmitter polarization purity of 123:1 and a receiver polarization purity of  $> 800 : 1$ , resulting in a system bias in the  
15 depolarization ratio no greater than 0.8%.

### 2.3 Diattenuation

~~Observed depolarization ratios are a function of atmospheric scattering, optical system setup, and recording systems. Traditional two-channel polarization systems can not unambiguously measure atmospheric depolarization without additional information. Separating atmospheric depolarization from systematic effects is non-trivial. show, for example, how to calibrate differential~~  
20 ~~detector sensitivity and receiver cross-talk, while show how to remove depolarization effects caused by receiver optical retardance and scattering. However, recording systems that are subject to saturation, or underrepresentation of signal strength compared to incident irradiance, can also cause depolarization ratio effects, which are not constant in range and can not be calibrated using methods like that presented in or. Depolarization effects related to saturation couple polarization measurements with terms in the SVLE like cloud base height, range, and optical thickness through signal intensity measurements.~~

25 The CAPABL system requires at least 3 polarization measurements to retrieve  $F_{11}(R)$ ,  $F_{12}(R)$ , and  $F_{33}(R)$ . However, saturation has been observed to cause biases in CAPABL measurements using only 3 polarizations, i.e. inability to measure all 3 signals over the entire dynamic range leading to an underrepresentation of signal strengths and causing biases in polarization retrievals. Thus, a fourth polarization channel is included, three to measure atmospheric properties and one to monitor recording system effects. For CAPABL, the  $F_{12}(R)$  term is measured twice using two sets of polarization channels with opposite  
30 sensitivity to saturation, i.e. one set of measurements is biased in the positive direction by saturation while the other set of measurements is biased in the negative direction. If the  $F_{12}(R)$  terms measured in two different ways are consistent at a given altitude, the lidar counting system is operating in a linear manner. An advantage of this over-constrained polarization retrieval is that CAPABL can actively monitor if the polarization measurements are acting properly or are causing systematic biases. A combination of any 3 of the 4 polarization channels can be used to optimize CAPABL's retrievals if the polarization signals

are not subject to saturation. If  $F_{12}(R)$  is zero, i.e no HOIC are present or the system is insensitive to orientation (~~as is the case within a few degrees of zenith or nadir~~)<sup>3</sup>, only 2 of the 4 channels are needed for atmospheric properties. However, if the polarization retrievals are subject to saturation, CAPABL's additional channels can be used to identify measurements with non-physical retrieved values and separate them from geophysical values. Therefore, including an extra polarization measurement and retrieving diattenuation can be used to verify two major assumptions: the presence of strictly randomly oriented ice crystals (ROIC) and counting system linearity.

### 3 CAPABL Hardware, Data Analysis, and Classification

The theory described in Sect. 2 is, in principle, valid for any measurement system type and polarization angle selection. However, as a practical matter, limitations in measurement systems must be considered. Measurement system sensitivity and dynamic range are the main concern for this work and, in particular, the limited observational dynamic range of signals.

Broadly, lidar counting systems can be classified as either photon counting systems or as analog systems. Photon counting systems are capable of measuring weak light signals, which allow them to observe high altitudes effectively (relative to analog detection assuming ground based measurements). Analog systems sacrifice sensitivity to measure stronger signals, which facilitates measurement of low altitudes. In photon counting, detector signals are discriminated with a fixed voltage threshold. This threshold is set to remove much of the electrical noise resulting from using single-photon, high-gain detectors. When a voltage signal is observed in excess of the threshold, a photo-electron is counted and its time of flight is assigned to a particular time bin. The intensity is presumed to be linearly related to the total number of counts in that bin over some integration period. Error can arise with this technique, however, if photons arrive at the counting system in close succession (Whiteman et al., 1992; Donovan et al., 1993). It is possible that pulses can pileup in such a way that two or more pulses either overlap in time or pass through the system faster than the counting system can reset itself. In either case, the intensity observed by the optical system is not linearly proportional to the number of photo-electrons counted because some photo-electrons have not been counted. In analog detection, the discrimination threshold is removed and the voltage produced by the detector is passed through an analog-to-digital converter with its amplitude providing the relative intensity of the collected backscattered signal. This method requires much higher signal-to-noise ratio than photon counting because it lacks a discriminator that separates the influence of detector circuit electrical noise from the desired signal.

#### 3.1 CAPABL Hardware

The CAPABL system has been deployed to Summit, Greenland within the ICECAPS sensor suite since 2010 (Shupe et al., 2013; Neely et al., 2013). Since its installation several hardware modifications, completed in June 2015, have improved the system's overall observational capacity. These modifications are described with an emphasis on how they allow the CAPABL

<sup>3</sup>Sensitivity to orientation is a combination of diattenuation per scatterer and backscattering efficiency of each scatterer. Measurements of diattenuation are a weighted average of the scatterers in the volume. CAPABL achieves sensitivity to HOIC through enhanced scattering near its tilt angle of 32° with enhanced backscattering from corner reflections within crystals allowing for low diattenuation cases and minor subpopulations to be observed. Insensitivity to orientation is a result of the randomly oriented population of scatterers dominating the return signal.

system to better observe clouds via enhancement of counting system dynamic range. The current system specifications are given in Table 1, which can be compared to Table 1 from Neely et al. (2013) for reference.

After several years of data collection, the original Nd:YLF laser was replaced by a more powerful Nd:YAG laser. This changed the laser wavelength from 523 *nm* to 532 *nm*. The optical components were ~~accordingly-changed~~ changed accordingly.

5 In addition, the original 35.6 *cm* telescope was replaced by a smaller 20.8 *cm* Schmidt Cassegrain telescope to allow the system to be more easily tilted; the current tilt angle, set in June 2015, is 32° from ~~vertical~~ zenith. The photo-multiplier tube (PMT) was upgraded from the original PMT, a Thorn EMI 9863B/100, to a Hamamatsu R7400U-03. These modifications have enhanced the power aperture product and the detection sensitivity of the system, which increased the overall signal-to-noise ratio.

The second major change was an upgrade of the receiver counting system from a purely photon counting system to a  
10 combined analog and photon counting system. By using a counting system that combines photon counting and analog detection, saturation in photon counting caused by high count rates is ameliorated by using analog detection, approximately  $> 10$  *MHz*, while maintaining sensitivity to low count rates, approximately  $< 1$  *MHz*, using photon counting detection. More about this counting system can be found in Newsom et al. (2009).

CAPABL observes 4 non-orthogonal receiver polarization channels. These polarizations are all linear and were oriented  
15 parallel to the outgoing polarization, 0°, perpendicular to the outgoing polarization, 90°, approximately 30° from parallel (or 60° from perpendicular) polarization (referred to as 3rd channel), and approximately 110° from parallel (or 20° from perpendicular) polarization (referred to as 4th channel). Combining the new counting system and the 4 linear polarizations with the non-orthogonal polarization theory, this allows 8 methods to ~~invert and~~ solve Eq. ~~A5-2~~ and Eq. 3. This variety of inversion methods grants flexibility to optimize polarization measurements.

## 20 3.2 Processing Methods

Data analysis and classification is performed by taking advantage of CAPABL's variety of polarization signal measurements. There are several levels of processing and filtering to ensure data quality. These are implemented in an automatic algorithm. The steps are given in Table 2 and described here in order.

CAPABL makes observations with 5 sec resolution per polarization angle and scans through 4 polarization angles before  
25 returning to the original polarization, taking a total of 20 sec before returning to the first polarization angle. The outgoing polarization is 45°. These ~~scans are parsed by like polarizations and~~ data are time integrated to 20 sec per polarization and spatially integrated to the resolution of 30 m. Non-paralyzable saturation corrections are applied per the method described in Appendix B and by Whiteman (2003) to the photon counting data. Note that the variance of saturation-corrected photon counting is not simply the variance from Poisson statistics, but also the error introduced by an inexact model fit is taken into  
30 account for all error analyses and is described in Appendix B. All data is then background subtracted and subject to an SNR filter. Photon counting data with less than one photon count per bin after background subtraction and analog voltages less than 1 mV per bin after background subtraction (SNR ratio of approximately -8 dB) are removed. This background subtracted and SNR filtered data is then passed through a speckle filter, which interrogates a 5 by 5 time and altitude bin region, referred

to here as a voxel ([volume pixel](#)), around each voxel of interest. Voxels, where more than 75% of the surrounding data are removed by the SNR filter, are also removed.

Depolarization, depolarization ratio, and diattenuation as well as their error estimates are calculated using the orthogonal polarization approach presented by Neely et al. (2013), and also using the non-orthogonal approach described here. The orthogonal approach uses all the same steps as Neely et al. (2013) but with the following exception. Instead of assuming the observations are made at exactly 1) parallel,  $0^\circ$ , 2) perpendicular,  $90^\circ$ , and 3)  $45^\circ$ , the angle of the third channel is carried through the analysis as a variable and the retrieved angle from atmospheric calibration is used. This is designed to accommodate for slight retardance changes in the liquid crystal variable retarder (LCVR) as a function of ambient laboratory temperature. For the depolarization retrieval in areas that lack oriented scatterers, the depolarization can be calculated with any two of the receiver polarization channels. HOIC are identified by non-zero diattenuation,  $D$ . Diattenuation is calculated in two ways, 1) using parallel, perpendicular, and the 3rd channel referred to as  $D_1$  and 2) using parallel, perpendicular, and the 4th channel referred to as  $D_2$ . These channels are chosen because of their opposite sensitivity to saturation for the photon counting and saturation corrected photon counting retrievals. By multiplying the two measurements together, negative values indicate  $D_1$  and  $D_2$  are tending in opposite directions indicating a saturation event. Conversely, positive values of  $D_1 D_2$  indicate the two measurements are tending together and that the non-zero diattenuation is physical, i.e. unaffected by saturation.

Data is removed outside of the allowable ranges:  $0 \leq d \leq 1$ ,  $0 \leq \sigma_d \leq 0.4$ ,  $-1 \leq D \leq 1$ , and  $0 \leq \sigma_D \leq 0.2$ , as these represent non-physical conditions. Note that the error analysis procedure for photon counting described by Neely et al. (2013) assumes Poisson statistics where the data is assumed shot noise limited. The same procedure for photon counting is carried through the analysis shown here. The analog signal is not governed by Poisson statistics however. The analog uses the variance of the background voltages for its error estimates. Additionally, as mentioned above, the variance for saturation corrected photon counting is modified to reflect the correction procedure and the variance introduced via inexact model fitting. Finally the backscattering ratio, the ratio of total scattering to molecular scattering, is calculated. Expected molecular scattering is calculated using temperature and pressure information collected from the ICECAPS twice daily radiosonde program, interpolating between launches. The inversion technique of Klett (1981) is used to calculate total scattering coefficient as described by Neely et al. (2013). A lidar ratio of 10 is assumed, following the [results of](#) Hoffmann et al. (2009) [and](#) review of Nott and Duck (2011) and references therein, to convert the total extinction derived by the Klett inversion to total backscattering coefficient.

The thresholds set for the automated classification algorithm are important to the interpretation of the results of this work. Depolarization and diattenuation are both elements of Mueller matrices, which are defined to have absolute values less than or equal to unity. Values outside this are non-physical. The values on the depolarization and diattenuation error bounds are limited mostly by background irradiance, which is tuned via receiver hardware. A receiver neutral density filter lowers both the signal count rates and atmospheric background count rate by a factor of 1000, which brings the majority of the signal intensity into the desired dynamic range of the counting system and makes the depolarization and diattenuation error values limited only by shot noise. The filters, which remove data points based on depolarization and diattenuation and their errors, remove less than 3% of all data values. For context, background and speckle filters remove approximately 60% and 23%, respectively, of all data points.

By design, CAPABL uses 4 polarization channels to measure 3 elements of the scattering Mueller matrix:  $F_{11}$ ,  $F_{12}$ , and  $F_{33}$  with one additional measurement to monitor saturation. If saturation is not an issue, any 3 of the 4 channels may be used for the inversion of polarization properties. Thus, the utility of the generalization given in Sect. 2 is that the 3 signals with the least error can be used at any time. For example, the 3 strongest signals for measurements of high ice clouds where backscattered signals are weaker or the 3 weakest measurements for low liquid clouds where the backscattered signal is stronger. Using non-orthogonal polarizations allows the dynamic range between polarization components to be accommodated and optimized.

### 3.3 Classification

Using all of the polarization processing listed above, the classification of data is performed in the following manner. Clear air is found as any voxel with a backscattering ratio less than 2.6. Sub-visible clouds and aerosols are any voxel with a backscattering ratio between 2.6 and 6.5. Clouds are tagged as voxels with backscattering ratio greater than 6.5. For reference, Cesana and Chepfer (2013) use a threshold value for backscattering ratio of 5 to identify cloudy scenes. Within cloud voxels, the depolarization ratio threshold, originally defined by Intrieri et al. (2002) of  $\delta_O \geq 0.11$  was used to define ice and  $\delta_O < 0.11$  as water. Any voxels tagged as aerosol that displays a depolarization ratio  $\delta_O \geq 0.11$  is reset as ice. HOIC are identified by  $D_1 D_2 > 0.01$  with  $\sigma_{D_1}, \sigma_{D_2} \leq 0.05$ .

Classified lidar profiles can then be condensed to a single column classification for the radiatively dominate species, referred to as the column type. If a column contains liquid voxels at any altitude, the column is labeled as liquid. If a column lacks liquid but contains ice voxels, it is labeled as ice. Ice is separated into 2 categories. If the column is labeled ice and contains HOIC at any altitude, it is labeled HOIC otherwise ROIC. If the column contains no liquid or ice but contains sub-visible voxels, it is labeled sub-visible. Finally, if the column lacks all other types of voxels, it is labeled as clear. One note is that this method can misclassify areas that lack lidar data as clear air. Lidar data can be lacking due to attenuation due to low-lying fog, clouds below lidar overlap, or an obstructed lidar window. In this case, data can be mistakenly classified as clear air. As a final check, data that is classified as clear air must have substantial signal above around 2 km altitude. This requires more than 66% of data for a profile between 1 and 2 km passes all other filtering steps otherwise it is tagged as obscured instead of clear air.

~~The thresholds set for the automated classification algorithm are important to the interpretation of the results of this work. Depolarization and diattenuation are both elements of Mueller matrices, which are defined to have absolute values less than or equal to unity. Values outside this are non-physical. The values on the depolarization and diattenuation error bounds are limited mostly by background irradiance, which is tuned via receiver hardware. A receiver neutral density filter lowers both the signal count rates and atmospheric background count rate by a factor of 1000, which brings the majority of the signal intensity into the desired dynamic range of the counting system and makes the depolarization and diattenuation error values limited only by shot noise. The filters, which remove data points based on depolarization and diattenuation and their errors, remove less than 3% of all data values. For context, background and speckle filters remove approximately 60 and 23, respectively, of all data points.~~

The setting of the backscatter ratio bounds is more subjective. As there is no true molecular measurement at Summit (for example provided by a Raman lidar or high spectral resolution lidar), the Klett inversion was used assuming a lidar ratio of

10. Curry et al. (1996) note that clear air is uncommon in the Arctic. It has been the authors' experience that even the clearest days at Summit still have some amount of ice in the sky. The clearest day observed within May and June 2015 is used as a baseline to set the clear air threshold of 2.6. The threshold limits between aerosol or sub-visible clouds and clouds were set using an all sky camera. The thinnest visible cloud layer observed during the same time period was used to separate the aerosol  
5 or sub-visible clouds and cloud classifications.

The threshold between liquid and ice,  $\delta_O = 0.11$ , is taken from literature related to the Depolarization and Backscatter Unattended Lidar (DABUL) (Intrieri et al., 2002; Shupe and Intrieri, 2004; Zuidema et al., 2005; Shupe et al., 2006), which was the predecessor to CAPABL, and not changed for this work. An analysis was performed (not shown) of the effect of this threshold on cloud fractional occurrence (FO), the ratio of a particular single column classification type to all measurements.  
10 This analysis shows that thresholds between  $\delta_O = 0.11$  and  $\delta_O = 0.2$  change the FO of liquid and ice by less than 1% over the period of a month for July 2015. Thresholds below  $\delta_O = 0.11$  significantly alter the FO of liquid and ice making  $\delta_O = 0.11$  a reasonable threshold value.

### 3.4 Algorithm Examples

An example of this data classification procedure is given in Fig. 1 for analog detection and Fig. 2 for photon counting detection  
15 for February 29, 2016. This day is chosen because it contains both single level and two level mixed-phase cloud systems as well as high ice clouds. In comparing these two figures in the first 12 hours of the day, the mixed-phase cloud layer at approximately 1.5 km altitude has been identified with substantially more liquid voxels when classified using analog detection than using photon counting detection. Furthermore, there are two smaller mixed-phase cloud layers that exist below 1 km  
20 between 3 and 5 UTC and 8 to 11 UTC identified by analog detection, which are interpreted as purely ice when classified with photon counting observations. This discrepancy in interpretation is directly linked to cloud macrophysical properties, such as base height and optical depth that result in high count rates and cause saturation of the photon counting parallel channel. This increases the observed depolarization ratio by reducing the parallel photon count rate beyond the liquid-ice threshold and alters the derivative of the signal intensity that affects the Klett inversion.

To demonstrate that the day selected is not anomalous, monthly statistics are compiled for the first 4 months of data available,  
25 July 2, 2015 to October 31, 2015, since the hardware updates described. Over this time, the CAPABL system ran continuously and had an uptime of > 99% (this equates to approximately 5 minutes of missed data per day, which occurs at midnight UTC each day to perform system diagnostics and housekeeping). Voxels are separated by cloud phase and clear air. Voxels are integrated over a month-long period for each altitude and time bin. These data are compiled into box-and-whisker plots given in Fig. ~~??~~-3 for liquid voxels only (liquid, ice, and clear air voxels are given in Appendix C Fig. A2). The median altitude of  
30 all ~~voxels for each identifier: ice, liquid, and clear air,~~ liquid voxels is given as a line through the center of the box, which is completed by the 25th and 75 percentile of all monthly data. The whiskers extend to the 5th and 95th percentiles. The other data values are considered outliers.

Figure ~~??~~ indicates 3 prominent features. First, the ~~3~~ indicates that median altitude of liquid voxels is not constant between analog, photon counting, and saturation corrected photon counting (SCPC) for either orthogonal or non-orthogonal retrievals.



There is a clear 1 to 2 km offset in the medians between analog and photon counting (1.72 km, 1.43 km, 0.75 km, and 0.91 km offsets for July, August, September, and October, respectively). This offset in mean voxel height indicates that low-level, liquid clouds are often misclassified by the photon counting channel as indicated by Fig. 1 and Fig. 2. ~~The second feature is seen in the clear sky data where there is increased sensitivity of the photon counting channel over the analog channel and increased sensitivity of the non-orthogonal polarization retrievals over the orthogonal versions. This increased sensitivity is seen by the increase in whisker range of approximately 1 (0.96, 0.70, 0.34, and 0.55 for July, August, September, and October for saturation corrected photon counting and analog to the 95th percentile, respectively, or 1.17, 1.12, 0.99, and 0.83 to the inner fence) indicating the presence of more high altitude clear air voxels that pass the quality control standards specified in Table 2. As a result of the increased sensitivity, the median altitude of the clear sky data shifts upwards as well (0.29, 0.29, 0.36, and 0.31 for July, August, September, and October for SCPC, respectively). The final feature is the relative consistency of the occurrence of ice for all methods. The median altitude of the ice-identified data shifts slightly upwards again due to increased sensitivity between analog and photon counting (0.05, 0.23, 0.36, and 0.23 for July, August, September, and October for saturation corrected photon counting and analog, respectively) but the boxes cover similar altitude ranges, especially for July. Comparing the whiskers for the non-orthogonal and orthogonal polarization retrievals within a month indicates that the increased sensitivity gained by using non-orthogonal polarization retrievals does not change the geophysical interpretation of the ice-identified data when saturation is of little concern (shifts of 0.26, 0.08, 0.21, and 0.10 for July, August, September, and October for analog to the 95th percentile, respectively, or 0.18, 0.13, 0.21, and 0.18 to the inner fence are observed), i.e. when signals are of similar strength or when signal rates are less than or on the order of approximately 1.~~

#### 20 4 Merged Best Estimate Cloud Product

The classification results of Fig. 1, 2, ~~??~~ 3 raise the question, "What retrieval technique is most accurate?". None of the results presented is perfect as each technique has innate benefits based on counting system dynamic range. For example, analog detection is designed for stronger signals, and photon counting detection for weaker signals. A single combination of all of the CAPABL data products leverages all of the advantages of analog and photon counting observations as well as non-orthogonal polarization retrievals to extend the dynamic range of the counting system. This section describes the broad rules used to combine all of the possible data collected into a single best estimate profile. This merging is done on the basis of signal counting regimes. Here valid signal ranges are defined where the measured signal count rate is linearly proportional to incident intensity at the detector. For analog detection, the range is fixed by the analog noise in the detector circuit on the low end and by the width of the analog-to-digital converter (ADC) bounds on the high end. For photon counting, the range is fixed by the discriminator threshold and pulse height distribution on the low end and detector and counting system dead time on the high end.

The SNR filter and the speckle filter are designed to remove data lacking signal strength in one or more of the polarization signals. These filters are applied to all data streams individually (to each polarization and counting type) and provide a lower

limit of acceptable count rates for all channels. This limit is much higher for analog detection (approximately 1 MHz) and much lower for photon counting detection (approximately 10-100 kHz). The upper limit of count rate is enforced via bounds set on the receiver ADC. The analog counting system is able to track PMT signals that exceed the ADC bounds. This occurs either with a PMT pulse that is too large or with multiple PMT pulses piling up in succession or with a pulse that has too large of a voltage rebound. The ADC bounds are set from -495 mV to 5 mV with negative tending detector signals, which are nominally set to result in PMT pulses of approximately 10-15 mV. In all cases, if any shot results in any altitude bin signal on any polarization outside the valid ADC range, that altitude bin is removed from the data stream (hereafter referred to as clipping). Such clipped signals compose approximately 0.78% of all data from 0 km to 8 km and are removed from both analog and photon counting detection data streams as they represent counting data that are no longer linearly proportional to incident intensity.

Applying the above filters to analog and photon counting raw data forces the data outside the valid counting range to be removed. For the analog signal, the data above the valid counting range is removed by the clipping filter, and the data below the valid count range is removed by the SNR and speckle filters. For the photon counting signal, the data below the valid count range is also removed by the SNR and speckle filters. The upper range of photon counting signal is however not necessarily limited by the clipping filter. In fact it is still poorly constrained due to possible pulse pileup. To specify the upper bound of the valid signal range for photon counting signals, the combination of analog and photon counting is considered. Implicit in the combined detection of analog and photon counting data is the assumption that there exists a range of counting signals, in the range of approximately 1- 10 MHz, where both signals are acting linearly, i.e. that both measurement values reported are linearly proportional to the incident intensity at the detector. By this assumption, all data measured by the analog channel will be an upper bound on the photon counting detection. Practically speaking, this means that data removed from the analog detection scheme by the SNR and speckle filters ~~is~~ are potentially valid photon counting data. Saturation corrected photon counting is not needed.

All data types are processed as described in Sect. 3 removing all invalid signals. Data is stitched together by first taking all valid orthogonal analog signals. Any locations where valid orthogonal photon counting signals are present that are not previously covered by analog are then added. Non-orthogonal data using the 3 strongest signals for analog first then photon counting are then added where available. Non-orthogonal data using the 3 weakest signals for analog only is then added to fill low altitude areas that may have been removed due to the parallel channel's clipping filter.

There exists another way of viewing analog, photon counting, and saturation corrected photon counting data, which is presented by Newsom et al. (2009), referred to as gluing. This work will not perform the gluing procedure presented for several reasons: first it is impractical to calculate gluing coefficients for CAPABL by atmospheric calibration as access to the CAPABL system is limited to once or twice a year, second it is not clear how to combine analog and photon counting signals at a single height to adequately account for error introduced by temporal variation of gluing coefficients, ~~and~~ third it is not clear how the range correlation of signals required for the Klett inversion method is affected by the thresholds of the gluing procedure, and finally, combining the data at the product level, and not the raw data level, is already required to combine orthogonal and non-orthogonal retrievals.

In contrast to these issues with data gluing, the method described above and used for this work addresses these problems in the following ways. Primarily, there is no need to track the temporal variation of gluing coefficients. By performing polarization retrievals as described, the time dependence of the detector is effectively canceled by ratio values of the polarization measurements. This method effectively reduces the assumption of a time variance in the detector from hours to the time it takes to make a complete polarization measurement set, which for CAPABL is 20 sec. Additionally, the range correlation required by the Klett inversion is preserved by considering each type of profile individually. Moreover, by systematically verifying each detector signal is within the counting system's observable and valid dynamic range, polarization retrievals can track Poisson or Gaussian errors (associated with photon counting and analog detection, respectively) in a more accountable way. Finally, as a practical matter, access to CAPABL occurs approximately once or twice per year. The method used allows the optical attenuation in the receiver to be set once and left untouched for the year.

An example of the merged data product is given in [Figure Fig. 4](#) for August 22, 2016. The raw analog signals are provided in the top panel, the merged data product in the middle panel, and the origin of the data for each pixel in the lower panel. This procedure takes most of its data from analog detection during daytime and low cloud scenes, much more data from photon counting during nighttime, and in the upper clear air and cloud scenes from non-orthogonal retrievals.

Considering the 4 month period of [Fig. 223](#), monthly FO values are calculated by CAPABL from its column data classification. FO is calculated for all types of data processing as well as the best estimate data product in [Fig. 5](#). [Figure 5](#) clearly illustrates several features. First, photon counting and saturation corrected photon counting dramatically underestimate the occurrence of liquid clouds. This is because both methods have strong saturation induced biases, linked to cloud base height and optical depth, which lower the observed parallel count rate artificially raising the observed depolarization and consequentially depolarization ratio. This serves to flip the classification of most water clouds to ice clouds. Second, analog detection underestimates overall cloud fraction due to its sensitivity, i.e. analog detection only sees clouds that are lower and more optically thick but misses many high tenuous clouds. Finally, in all cases, the merged data has less clear air than the single measurement techniques caused by an extended dynamic range and altitude range of observable signals.

## 5 Multisensor [Validation Comparison](#)

[Validation Comparison](#) of remote sensing instrumentation that lack traceable calibration standards such as polarization lidars is of particular importance (Freudenthaler, 2016). This section evaluates the CAPABL cloud identification data product by using ancillary measurements taken by the ICECAPS program, namely a co-located micro-pulse lidar (MPL), millimeter cloud radar (MMCR), microwave radiometer (MWR) and broadband radiation measurements. The period of comparison is from July to December 2016. For this period, each sensor had an uptime of better than 95%; one major reason for the period selected is the simultaneous measurement of much of the ICECAPS suite. This period also covers both polar day and night.

One important note for interpreting the results presented is the instrument pointing angle for CAPABL, MPL, MWR, MMCR, and radiation measurements. CAPABL operates at  $32^\circ$  off zenith, the MPL operates at approximately  $5^\circ$  off zenith, and the MMCR within  $0.2^\circ$  of zenith. The radiation measurements are approximately 600 m away from CAPABL, MPL, MWR, and

MMCR measurements and are total hemispheric measurements instead of narrow field of view. Given these constraints, the assumption of horizontal homogeneity of the scene above the site on the order of 500 m is required for an average voxel height of 2 km.

## 5.1 Colocated Instruments

### 5 Micro-Pulse Lidar (MPL)

The MPL used in this work is a Sigma Space V4 polarization sensitive system provided to the project by the ARM Program. The MPL uses a frequency doubled Nd:YAG laser at 532 nm. The system hardware design is well described by Campbell et al. (2002) and the polarization hardware and retrievals by Flynn et al. (2007).

MPL data is processed as follows. MPL raw data (photon counts) are time and space integrated as close as possible to CAPABL's data grid. Calibrations as described by Campbell et al. (2002) are performed monthly to remove signal induced noise (SIN) resulting from the strong light signals from the shared telescope transceiver design. The SIN calibration corrections applied are linear interpolations between subsequent SIN calibrations. The calibration data is taken at 30 m resolution, which sets the lidar range resolution of this study. This SIN corrected raw data is then linearly interpolated from the MPL grid directly to the CAPABL grid. The polarization properties are calculated as in Flynn et al. (2007) with no modification to the method presented. Note that the MPL measures depolarization using both linear and circular polarizations while CAPABL measures only linear polarizations. A comparison of the specifications of CAPABL and the MPL is given in Table 3.

MPL data is classified as for CAPABL. Note that the MPL is only a photon counting system while CAPABL uses both analog and photon counting, and CAPABL has the unique ability to measure the  $F_{12}$  element of the scattering matrix upon which the diattenuation measurement is based. Filtering steps based on diattenuation and classification for HOIC are not performed by the MPL given the inability to make  $F_{12}$  measurements. For this study, MPL data results in voxel classifications that are either clear air, cloud ice, cloud liquid, or removed due to data filtering.

### Millimeter Cloud Radar (MMCR)

The MMCR used in this study was developed and provided by the National Oceanic and Atmospheric Administration's (NOAA) Earth Systems Research Laboratory. The MMCR is a 35 GHz single polarization Doppler radar. A general hardware description is given by Moran et al. (1998) and its software and operational measurement modes documented by Clothiaux et al. (1999). Data products available are based on observed Doppler spectra. Specifically, the system reports reflectivity (the integral of power in the Doppler spectrum), mean Doppler velocity (the first moment of the Doppler spectrum), and Doppler spectral width (the second moment of the Doppler spectrum). The zenith-pointing system occupies space in the same building as CAPABL and is carefully leveled by an onsite technician as needed to within approximately  $0.2^\circ$  of zenith as the snow on which the building sits settles.

Data used for this study are from the radar general mode and high sensitivity mode, referred to here as cirrus mode, with some operational settings given in Table 4. Radar data is generally taken at higher temporal resolution and lower spatial resolution

than CAPABL. To push-represent the radar data onto a similar grid as CAPABL and the MPL, radar data is incoherently averaged in time to as close to the CAPABL grid as possible. Then, as with the MPL, data is linearly interpolated in time and space to the CAPABL grid.

### **Microwave Radiometer (MWR)**

- 5 Column moisture measurements are calculated using two co-located MWRs manufactured by Radiometer Physics GmbH (RPG). The first radiometer, an RPG Humidity and Temperature Profiler (HATPRO), samples 14 channels from 22.2 GHz to 60 GHz of which 23.8 GHz and 31.4 GHz are used to retrieve precipitable water vapor and cloud liquid water while the second radiometer, an RPG LWP-90-150, samples at 90 GHz and 150 GHz. From microwave brightness temperature observations, the column liquid water path (LWP) is retrieved using physical retrievals and an optimal estimation algorithm.
- 10 The LWP uncertainty using the 23.8 GHz, 31.4 GHz, 90 GHz, and 150 GHz data in the retrieval is approximately 5 g/m<sup>2</sup> (Cadeddu et al., 2013). Similar steps, incoherent averaging in time then linear interpolation, are performed as with the radar to push-represent MWR data onto CAPABL's grid. MWR data is a column measurement so averaging and interpolation are only performed in time and are compared to CAPABL's column data product.

### **Radiation**

- 15 Surface broadband radiation measurements are made at Summit by a pair of heated aspirated Kipp and Zonen CM22 pyranometers with spectral sensitivity from 0.2  $\mu\text{m}$  to 3.6  $\mu\text{m}$  and a pair of aspirated Eppley Precision Infrared Radiometers (PIR) pyrgeometers, sensitive to the spectral range from 3.5  $\mu\text{m}$  to 50  $\mu\text{m}$ . These instruments were originally installed in August 2013 by NOAA's Global Monitoring Division. The instruments are maintained by an onsite technician at Summit, including daily removal of accumulated ice or snow. Raw data is reported as 1 min averages.
- 20 The pyranometers are calibrated every 2 years at NOAA's Solar Radiation Calibration Facility. The raw data are quality controlled by NOAA's Global Monitoring Division Radiation Group. A dome correction factor for the longwave PIR is applied similar to that of Albrecht and Cox (1977). More information about the available radiation measurements at Summit is given by Miller et al. (2015).

### **5.2 Direct Lidar Comparisons**

- 25 The first comparison performed is between CAPABL and the MPL. This is the simplest comparison to make because the data products of the MPL and CAPABL are very similar and both systems use the same operational principles. Because both instruments are lidars and have similar data streams, the results can be compared directly. As such, CAPABL's merged best estimate voxel identifications are compared directly to the MPL's voxel identifications. Voxel identifications from CAPABL and the MPL compared for three separate time periods: July 2016, December 2016, and July-December 2016. These data are
- 30 given in a confusion matrix, a classification model to compare two sets of results, in Table 5, where ROIC and HOIC voxels are both combined for this comparison into "CAPABL Ice".

The time periods given in Table 5 are selected due to the solar background conditions. During the summer, July, the sun is always above the horizon at Summit. During the winter, December, the sun is always below the horizon at Summit. These two cases are highlighted to show the difference solar background makes on the data and in particular the effect on the MPL signals, which are affected strongly by solar background. CAPABL is less affected by solar background because of the receiver attenuation.

Table 5 highlights some significant sensitivity improvements of CAPABL's merged data product for daytime operations compared to the MPL. In the clear column for example, in approximately 98% of the time that CAPABL observes clear air, the MPL either agrees or lacks data to refute the CAPABL measurements over the entire study period (seen in Table 5 summing similar time periods in cells A and M). This increases to 99.5% for daylight measurements. Likewise, 96% of the data in daylight that fails the CAPABL filtering process also fails the MPL's filtering process (first line of cell P) indicating a limit of penetrable optical depth for a given power-aperture product that is a theoretical limit of all lidars. In many cases, highlighted in boxes B and C in Table 5, the MPL observes clear air while CAPABL observed clouds of some sort. This is linked directly to the Klett inversion technique requiring a strong signal derivative to highlight large backscattering ratios, approximately  $> 5.0$ . In the case of many high clouds, the signal derivative is not strong due to noise in the perpendicular observation channel of the MPL. In comparison, the values highlighted in boxes E and I in Table 5 are more than two orders of magnitude smaller because the strength of the perpendicular signal does not limit the detection range for CAPABL as it does for the MPL due to CAPABL's non-orthogonal polarization retrievals.

The sensitivity of CAPABL is linked directly to the use of ~~analog-detection-and~~ non-orthogonal polarizations and analog detection. A limitation of traditional orthogonal polarization retrievals for lidar is the fact that one channel is often of higher signal strength than the other. For the MPL, the circular polarization channel is much stronger than the perpendicular polarization for low depolarization targets like clear air and liquid water. As a result, the dynamic range of the system is partially reduced by the measurement setup. For example, a depolarization of 1% would yield a difference in signal ranges of 2 orders of magnitude at a constant altitude. Therefore, for the system to observe such low depolarization, the system necessarily must sacrifice range. In terms of altitude, the lowest possible observations are set by the circular channel overlap considerations and the counting system dead time, and the highest possible observations are set by the SNR of the perpendicular signal. In contrast, CAPABL's minimum range is set by the second weakest of its 4 polarizations (the 3rd channel) and maximum range is set by the second strongest of its 4 polarizations (the 4th channel). By design, the 3rd channel is approximately half of the parallel channel's intensity and the 4th channel exceeds the perpendicular signal intensity by more than an order of magnitude enhancing the observable range of the system in both high and low altitudes simultaneously. As a result, CAPABL is much more sensitive to a wider range of clouds and cloud properties because it is less constrained by its observable dynamic range.

The data presented in Table 5 for December observations ~~show a major jump where CAPABL shows a large disagreement between CAPABL and the MPL (Table 5 cell D). Here CAPABL data fails QC filtering but MPL data shows clear air (seen in Table 5 cell D). The filtering performed after SNR and speckle filtering by CAPABL is mostly done via the unique diattenuation measurement and diattenuation error bounds. As a result, the depolarization filters are set fairly wide as they are practically unneeded. However, for the MPL, the same bounds for the filter do not tag similar low SNR cases. As a result, is classified~~

as clear air. The majority of the CAPABL observations filtered from the analysis are excluded because they do not meet the requirements of being a valid diattenuation observations. Either, the measurements do not pass the consistency test or have an unacceptably large error. Because the diattenuation filtering is unique to CAPABL, applying this exact filtering scheme to the MPL is impossible and CAPABL data is filtered more conservatively than the MPL given the same filtering-bounds on-depolarization-based-on-the-diattenuation-filter-that-can-not-be-applied-to-the-MPL bounds for filters common to both instruments.

The MPL and CAPABL rarely miss detecting cloud cases when they are observable by lidar. For each background condition and for the entire length of the study, not more than 3% of data is missed by one instrument when the other instrument sees cloud activity, indicated by the maximum value in boxes H, L, N and O. However, the MPL frequently mischaracterizes clouds as clear, as highlighted in cells B and C in Table 5. This is attributed as above to the signal in high background cases being hard to determine and the Klett inversion often misses thin cloud layers.

The final comparison to be made is related to the effect in this data set of multiple scattering. The effect of multiple scattering tends to raise the depolarization observed and delay the return of lidar signals to the system. As a direct result, the tops of thick liquid clouds in this data set can be misclassified as ice. While this effect results in a constant high depolarization bias across all measurement types for CAPABL, the overall effect is testable given the much smaller field of view of the MPL. The values in Table 5 box G indicate the total measurement error caused by multiple scattering in CAPABL's data set. Over the 6 month period of study, approximately 2% of liquid voxels identified by the MPL (with smaller field of view and thus less sensitivity to multiple scattering) are misclassified by CAPABL.

### 5.3 Comparisons with Non-Lidar Data Sources

Comparisons of CAPABL data to ancillary, non-lidar, instrumentation is less straightforward than the comparison presented with the MPL. Instead of a direct comparison such as presented in Table 5, arguments about data consistency must be made. For example, within a mixed-phase cloud, both phases of water will have large size parameters (the radius of the particle,  $r$  relative to the wavelength,  $\lambda$ , given as  $2\pi r/\lambda$ ), likely greater than 50-100 when observed by lidar, whereas at the radar wavelength the size parameter is much less than 1. In this regime, the lidar will see a scatterer well into the resonant and geometric optics regime of elastic scattering whereas the radar will see a Rayleigh scattering target. As such, the two systems respond to different aspects of the hydrometeor population; this is one major benefit for having multiple sensors.

The expectations of multi-sensor comparisons are as follows. At 35 GHz, the MMCR signal is nominally proportional to hydrometeor size to the 6th power and is thus dominated by ice because liquid water drops are much smaller in diameter than ice in the Arctic (Turner, 2005; Shupe et al., 2006, 2013). Liquid water droplets are on the order of  $10^{-5}$  m while ice crystals are on the order of  $10^{-4}$  m to  $10^{-3}$  m. By extension, the MMCR is more sensitive to liquid water droplets than clear air. One expects therefore, to see higher radar reflectivity for ice than liquid and less still for clear air. Furthermore, as ice is much larger at Summit than liquid water droplets one expects to see higher mean Doppler velocities for ice as liquid water drops are too small to be effectively precipitated (Morrison et al., 2012). For comparison of CAPABL's data to column measurements of

liquid water path with the MWR, one expects CAPABL to identify liquid overhead while the MWR observes a positive liquid water path. Likewise, one expects to have little to no liquid water path measured for ice or clear air columns.

In light of these expectations based on observed geophysical properties, the multi-sensor comparisons are performed as follows. MWR data are processed and interpolated to the CAPABL time grid. CAPABL data are then collapsed to a column measurement based on the most radiatively important voxel type. The MWR LWP data are then assigned to one of the 4 possible column types: clear, ice (with HOIC labeled as HOIC or without labeled as ROIC), or liquid defined by CAPABL. The probability density function of the MWR LWP characteristics are calculated from all available data for each classification type. The cumulative distribution function is then calculated and presented in [Figure-Fig. 6](#). The data that [has have](#) been filtered by lidar are removed. Raw radar data that has been [pushed-interpolated](#) to CAPABL's data grid is assigned using CAPABL's data identifiers. The 5 data types (clear air, cloud liquid, ROIC, HOIC, and filtered) are each distinctly binned together. The probability density function of the radar characteristics and the cumulative distribution function are also calculated from all available data. The data that [has have](#) been filtered by lidar are removed. The cumulative distribution functions of the remaining 4 variables are shown in [Figure-Fig. 6](#) for the first 2 radar Doppler moments and its SNR. In this time period, CAPABL has data available for 75.3% of the total voxels where there is filtered MMCR data available. Note that though they contain and represent the same data, this work will choose to represent instrument comparisons in terms of their cumulative distribution functions as opposed to the probability density function. Both facilitate comparisons of large quantities of data but cumulative distribution functions allow simple comparisons of differences of shape and median whereas the probability density function allows for investigations of modes and biases.

It can be seen in [Figure-Fig. 6](#) that the expected relationships between the lidar, MWR, and MMCR hold very well. Nearly 69% of all columns tagged as containing liquid by CAPABL have non-zero LWP (here zero and non-zero are taken below and above the error bounds of the measurement, respectively). Almost 91% of columns tagged as ROIC, 90% tagged with HOIC, and 91% tagged as clear do not have LWPs above the error bounds of the MWR measurement. CAPABL can mis-identify very low cloud and precipitation, below approximately 200 m, as clear air columns because there is no identifiable cloud voxels in the instrument's valid sample volume. In terms of comparison to radar, this is not a problem as no mask is returned and is thus not considered, but in terms of column measurements this will yield an error in identification. ~~The values given in Figure 6 are filtered conservatively. Further filtering~~ [More strenuous filtering of the column mask by the flag indicating obscuration described in Sect. 3.3](#) increase the percent of clear air, ROIC, and HOIC data with zero LWP on the order of approximately 5%. [From the MWR perspective, 83% of instances where non-zero LWP are observed are either marked as liquid or obscured by CAPABL. Clear air, ROIC, and HOIC comprise the other 3%, 10%, and 4%, respectively. It should be noted that scattering of surface radiation has been shown to cause erroneous non-zero liquid water path of thick ice layers \(Pettersen et al., 2016\). More strenuous filtering of the column mask by the flag indicating obscuration similarly lowers these percentages to reduce the overall clear air, ROIC, and HOIC instances with non-zero LWP.](#)

[CAPABL has valid observations at 75% of locations where valid MMCR data is observed over the time period of interest.](#) The reflectivity of clear air voxels is much lower than that of ice and liquid water. More than 89% of all voxels identified by CAPABL as clear fall below -20 dBZ whereas only 42% identified as ice fall below the same threshold. This is confirmed with



radar SNR where 69% of all clear air data falls below the SNR threshold of -20 dBZ (this value is 72% for the threshold of -14 dBZ used by Shupe et al. (2013)). Similarly, the largest scatterers, ROIC and HOIC, have higher SNR. Note that HOIC have a lower median reflectivity than ROIC in [Figure-Fig. 6](#). This is not true in the more sensitive radar cirrus mode above 3 km ([cirrus mode is more sensitive than the general mode designed for higher altitude observations](#) (Clothiaux et al., 1999)). The cumulative distributions for the radar cirrus mode (not shown) have reflectivity values for ROIC and HOIC that nearly overlap. This change in reflectivity and inconsistency between radar modes could indicate two things: first that HOIC are possibly occurring in thinner more tenuous clouds on average than ROIC with smaller ice particles, or second that ground based lidar measurements have a sampling bias that only allows observations of HOIC in thinner clouds.

ROIC has the highest Doppler velocity, with HOIC and liquid falling slower. ROIC has a median mean Doppler velocity of approximately 0.57 m/s downward, while HOIC and liquid are 0.47 m/s and 0.38 m/s, respectively, both in the downward direction. The occurrence of falling liquid indicates mixed phase voxels where CAPABL is more sensitive to the liquid phase and MMCR to the ice phase. The slight skewness of the clear air identifier to downward mean Doppler velocity, indicated by the non-zero median, indicates that some ice is being tagged as clear air by CAPABL, which is known to occur at the very top of clouds and below very optically thick clouds due to the Klett inversion, and is especially prominent as mentioned with the MWR results where low (below approximately 100-200 m) thick clouds are observed. The reduced Doppler velocity of HOIC is anticipated due to the enhanced aerodynamic drag associated with their orientation (Westbrook et al., 2010). This is a clear verification that HOIC identification by CAPABL based on the novel diattenuation technique of Neely et al. (2013) is physically consistent.

## 6 Discussion and Conclusion

### 6.1 Applicability to Other Lidar Sensors

Polarimetric lidar systems are widely deployed. Nott and Duck (2011) and references therein lists many other ground based lidar deployment sites in the polar regions such as Syowa, Antarctica, South Pole, Antarctica, Eureka, Canada, and Barrow, Alaska. Further, the CALIOP lidar on board the CALIPSO satellite uses analog detection, and regularly observes the polar regions (Winker et al., 2009). Due to varying configurations and approaches by other lidars, it is difficult to specifically identify how well other comparable systems represent cloud properties, but the unique instrument suite at Summit and the novel lidar configuration of the CAPABL system enable such an analysis.

Lidar systems are fundamentally limited by their receiver dynamic range. For polarized systems, like CAPABL and the MPL, observational range is inversely related to atmospheric depolarization. Assuming a limited dynamic range of 5 orders of magnitude, this can be parsed either for range, arising from the  $A/R^2$  term in the lidar equation, or by depolarization. For depolarization ratios of 1%, this leaves only 3 orders of magnitude for changes in range. The altitude range is limited on top by weak perpendicular signals and on the bottom by strong parallel signals. Fundamentally, this limits the effective observational range that has the effect of biasing attribution of cloud properties on, for example, evaluating the radiation budget. At Summit, CAPABL provides a fully merged data product that covered 34% of the column from 0 km to 8 km for July to December

2016. Using only orthogonal components from analog and photon counting results in only 25% coverage. In comparison to CAPABL, the MPL observed 19% of the column above Summit in summer (CAPABL observes 25% for the fully merged mask and only 18% for the orthogonal components) and 44% in winter (CAPABL observes 45% for the fully merged mask and only 31% for the orthogonal components). The data is split again noting that CAPABL is more conservatively filtered in the winter  
5 based on its diattenuation filtering. Thus, the general impact of lidar observations is site and lidar specific (as is analyzed for Summit in Section 6.2) but should be recognized as a possible cause for interpretive bias.

Potential shortcomings of limited counting system dynamic range are clearly visible in the data shown in this work. Figure 5 shows the FO of clouds above Summit using analog detection and photon counting detection, as well as orthogonal and non-orthogonal polarization retrievals. Each of these observational methods can handle slightly different altitude ranges based  
10 on the signal strength and system sensitivity to those signals. The results indicate that the occurrence of liquid water can be underestimated by as much as 30% depending on the counting type. This limitation is due to low level clouds causing saturation in photon counting detection, especially in the stronger polarization channels, which overestimates depolarization, and consequently the depolarization ratio, which makes liquid clouds look like ice clouds. Photon counting systems, such as  
15 the polarization sensitive MPL, are susceptible to this sort of underestimation of liquid water clouds. In the opposite direction, analog detection underestimates total cloud FO, on the order of 4% to 22%, because it is insensitive to higher, optically thinner, ice clouds that are clearly visible using photon counting detection. In either case, the choice of counting system type, or indeed receiver polarization selection, limits the altitude range of interest and by extension the clouds to be observed. The unique configuration of CAPABL allows for these assessments to be made and optimized.

Another clear limitation of lidar sensors is their inability to observe the entire vertical column in the presence of optically  
20 thick clouds with visible optical depths on the order of 3 or greater. This limitation is clearly visible in CAPABL's data and in particular its incomplete coverage of the entire altitude range above Summit during times of mixed-phase clouds. Similar limitations are to be expected from both ground-based systems and space-based systems. ~~An analysis of ground- and space-based observations of HOIC strongly indicates differences based on viewing orientation. At Summit, HOIC are most commonly observed in CAPABL's data set in precipitation and stratiform clouds. Results from CALIOP, e.g., indicate  
25 HOIC are common in cirrus clouds. CAPABL does observe some HOIC in cirrus but rarely due to extinction caused by lower clouds. This suggests a viewing bias, both from the ground and from space, that impacts our understanding of ice crystal orientation. The unique diattenuation observations by CAPABL provide a ground-based capability to observe HOICs under different viewing conditions.~~

## 6.2 Impact on Attribution of Cloud Effects on the Surface Radiation Budget

30 In a similar method to data comparisons with LWP, comparisons of CAPABL data to observed downwelling and upwelling longwave (LW) and shortwave (SW) radiation fluxes have been performed. These comparisons elucidate the drawbacks of certain lidar methodologies and optimizes CAPABL's approach to provide a best estimate. The cumulative distribution functions of downwelling and upwelling LW and SW radiation measurements as well as the net radiation, defined as  $Net = LW \downarrow + SW \downarrow - LW \uparrow - SW \uparrow$ , are given in [Figure Fig. 7](#) for CAPABL's merged best estimate data product, parsed into column

types: clear air, ice (with and without HOIC), and liquid bearing. Figure 7 shows some simple relationships that are examined for consistency with previous studies. The median value of downwelling LW radiation is higher for liquid clouds than it is for ice clouds, which is higher still than for clear air. This is expected based on many previous results including those of Curry et al. (1996); Shupe and Intrieri (2004); Miller et al. (2015). Likewise, the downwelling SW flux is highest for clear air and reduced for ice clouds, which is further reduced for liquid clouds. This shows the dominance of cloud visible optical depth by liquid clouds, which is well described by Shupe and Intrieri (2004); Stevens and Bony (2013); Miller et al. (2015). The upwelling LW measurements are highest for liquid cloud scenes, which can be understood based on the enhanced downwelling LW radiation and emission that scales with surface temperature to the fourth power. Miller et al. (2017) showed warmer surface temperatures occur with liquid clouds overhead. Finally, upwelling SW is simply the scaled version of the downwelling SW, scaled by surface albedo. These results are all expected and provide further validation that the CAPABL cloud identification procedure is acting as expected.

The median values of all distributions for the three CAPABL classification types, analog, photon counting, and merged, and all four radiation types and the net radiation are listed in Table 6. The merged column is our best estimate through signal combinations so that a difference between merged and analog or merged and photon counting indicate limitations for those stand alone techniques. For example, the percent difference for the downwelling longwave radiation for clear air and ROIC is on the order of 5-10% ([seen in Table 6 in the LW ↓ section](#)). This difference for analog is attributed to difficulty measuring the whole column of ice especially in the polar summer with just orthogonal polarization retrievals. Due to its lower designed sensitivity, the analog clear air classification misses some ice clouds that contaminate the clear air classification. The difference for photon counting is attributed to saturation. The ROIC classification is contaminated by low liquid clouds artificially raising the overall downwelling longwave effect. The same affects the downwelling shortwave measurements on the order of 10% ([seen in Table 6 in the SW ↓ section](#)). For photon counting measurements, contamination from liquid clouds lowers the downwelling shortwave component. For the total radiative components, the lack of sensitivity of the analog channel artificially raises the clear air radiative balance towards the values for ice clouds. For the photon counting component, saturation raises the ROIC radiative balance towards the values for liquid clouds. In all cases, traditional lidar data used to attribute radiative fluxes will introduce large uncertainties based on the lidar's inability to measure the whole atmospheric column related to its limited dynamic range. Enhancing measurements as done in this work with [non-orthogonal polarization retrievals as well as analog and photon counting detection](#) ~~as well as non-orthogonal polarization retrievals~~ allows for a more complete attribution of radiative effects linked to cloud properties.

A second method of analyzing the radiative importance of this work is to use literature values to estimate cloud radiative effects. Figure 5 gives the FO of voxel types in the column above CAPABL. Using this FO, literature values such as those presented by Miller et al. (2015) can be used to estimate misattribution of cloud radiative effects. Figure 5 shows a difference of approximately 30% from analog to photon counting for liquid FO. This difference can be used to approximate an error in cloud radiative forcing using the results from Fig. 7 from Miller et al. (2015). Using an average difference of 30%, this time period of fractional occurrence of liquid clouds equates to an error in longwave cloud radiative effect of approximately 10 W/m<sup>2</sup>. Miller et al. (2015) finds an average of 33 W/m<sup>2</sup> for cloud radiative forcing at Summit suggesting that using

conventional lidar approaches to infer radiative impacts could under-represent forcing by as much as one third. The CAPABL approach improves the situation significantly leading to better attribution of cloud effects on radiative fluxes.

### 6.3 Main Conclusions

This work has demonstrated three key points. The first point is that cloud phase classification by polarimetric lidar is sensitive not only to the cloud phase but to lidar design properties such as receiver polarization, detection schemes, and backscattered signal count rate and, by extension, cloud macrophysical properties such as base height (or range) and optical depth. The second point is the utility of non-orthogonal polarization measurements to improve cloud classifications. By employing multiple planes of polarization in the lidar receiver, in the case of CAPABL four linear planes, the diversity in backscattered intensity may be handled more judiciously making the characterization of cloud types more accountable. This effectively spreads the required dynamic range of signals among the multiple polarization measurements. By measuring additional planes of polarization beyond what is required for geophysical retrievals allows the CAPABL system to self analyze limitations in a channel's performance, correct some of the behavior through non-orthogonal signal combinations, and optimize the use of the different channels for different cloud scattering conditions. In high dynamic range targets, like optically thick liquid-only or mixed-phase clouds, systematic errors can cause a misrepresentation in traditional polarization-sensitive lidars of liquid clouds as ice clouds. Here this is shown to occur on the order of 30% of the time for CAPABL but is correctable using the presented novel polarization scheme. Finally, this work has analyzed the effects of lidar data in terms of radiative attribution. Using a particular detection system such as photon counting, orthogonal polarization measurements can dramatically mis-represent cloud radiative effect. Using radiation measurements from Summit, errors in attribution of radiative scenes related to cloud phase can be on the order of 10% of the net radiation. Using cloud fraction as an estimator with previously published radiative estimates of Miller et al. (2015) suggests an even higher 30% misattribution.

*Code and data availability.* All data collected by the ICECAPS program is publicly available at: [anonymous@ftp1.esrl.noaa.gov/psd3/arctic/summit/](mailto:anonymous@ftp1.esrl.noaa.gov/psd3/arctic/summit/). Radiation data collected by the NOAA is publicly available at: <ftp://aftp.cmdl.noaa.gov/data/radiation/baseline/sum/>. The code developed to process the CAPABL data is available by request from the authors.

### Appendix A: [Derivation of Generalized Depolarization and Diattenuation Expressions](#)

[From the general form of the Stokes vector lidar equation given in Eq. 1, the number of photons to be observed in any arbitrary linear polarization channel can be derived. Assuming that CAPABL: 1\) emits a linear polarized signal at angle  \$\phi\$ , yielding the simplification](#)

$$\bar{\bar{M}}_{T_x}(\bar{k}_i) \bar{S}_{T_x} = \begin{bmatrix} 1 & \cos(2\phi) & \sin(2\phi) & 0 \end{bmatrix}^T, \quad (\text{A1})$$

2) only measures linear polarized signal at angle  $\theta$  from the reference transmit polarization, (Neely et al. (2013) Eq. 15 with  $A(\Gamma_{wp}) \equiv \bar{\bar{M}}_{R_x}(2\theta)$ ) yielding the simplification

$$\bar{\bar{M}}_{R_x}(\bar{k}_s) = \frac{1}{2} \begin{bmatrix} 1 & \cos(2\theta) & \sin(2\theta) & 0 \\ 1 & \cos(2\theta) & \sin(2\theta) & 0 \\ 0 & 0 & 0 & 0 \\ 0 & 0 & 0 & 0 \end{bmatrix}, \quad (\text{A2})$$

and 3) using the definition of the backscattering phase matrix (Hayman and Thayer, 2012; Neely et al., 2013)

$$5 \quad \bar{\bar{F}}(\bar{k}_i, -\bar{k}_i, R) = \begin{bmatrix} F_{11}(R) & F_{12}(R) & 0 & 0 \\ F_{12}(R) & F_{22}(R) & 0 & 0 \\ 0 & 0 & F_{33}(R) & F_{34}(R) \\ 0 & 0 & F_{34}(R) & F_{44}(R) \end{bmatrix} \quad (\text{A3})$$

the number of photons to be observed in any arbitrary linear polarization channel is given in Eq. A4 as

$$\underline{N}_M(\underline{R}) = \xi(\underline{R}) \left[ \underline{F}_{11}(\underline{R}) + \cos(2\theta) \underline{F}_{12}(\underline{R}) + \cos(2\phi) \left( \underline{F}_{12}(\underline{R}) + \cos(2\theta) \underline{F}_{22}(\underline{R}) \right) + \sin(2\theta) \sin(2\phi) \underline{F}_{33}(\underline{R}) \right]. \quad (\text{A4})$$

Here, all constant terms of Eq. 1, which will cancel when taking signal ratios, are lumped into the term  $\xi(R)$  such as the measurement solid angle, geometric overlap, range resolution, and atmospheric transmission.

- 10 The number of measured photons incident upon the photodetector,  $N_M(R)$ , is a function of transmitted and received polarization angle  $\phi$  and  $\theta$ , respectively, and is related to the scattering phase matrix terms,  $F_{11}(R)$ ,  $F_{12}(R)$ ,  $F_{22}(R)$ , and  $F_{33}(R)$ , which are all functions of range. For CAPABL,  $\phi = 45^\circ$ ; applying this constraint to Eq. A4 cancels the functional dependency on  $F_{22}(R)$  by design. Thus, using three distinct receiver polarization channels:  $\theta_1$ ,  $\theta_2$ , and  $\theta_3$ , one can create a set of three simultaneous equations which can be inverted to calculate the Mueller matrix terms of interest that describe
- 15 backscattering coefficient ( $F_{11}$ ), volume depolarization ( $F_{33}/F_{11}$ ), and volume diattenuation ( $F_{12}/F_{11}$ ). This set of equations is given in Eq. A5 as

$$\begin{bmatrix} \underline{N}_1(\underline{R}) \\ \underline{N}_2(\underline{R}) \\ \underline{N}_3(\underline{R}) \end{bmatrix} = \xi(\underline{R}) \begin{bmatrix} \underline{1} & \cos(2\theta_1) & \sin(2\theta_1) \\ \underline{1} & \cos(2\theta_2) & \sin(2\theta_2) \\ \underline{1} & \cos(2\theta_3) & \sin(2\theta_3) \end{bmatrix} \begin{bmatrix} \underline{F}_{11}(\underline{R}) \\ \underline{F}_{12}(\underline{R}) \\ \underline{F}_{33}(\underline{R}) \end{bmatrix} \Rightarrow \bar{N} = \bar{A}\bar{F}. \quad (\text{A5})$$

The general matrix inverse of  $\bar{A}$  is given in Eq. A6 as

$$\bar{A}^{-1} = \frac{1}{\zeta} \begin{bmatrix} \sin(2\theta_2 - 2\theta_3) & \sin(2\theta_3 - 2\theta_1) & \sin(2\theta_1 - 2\theta_2) \\ \sin(2\theta_3) - \sin(2\theta_2) & \sin(2\theta_1) - \sin(2\theta_3) & \sin(2\theta_2) - \sin(2\theta_1) \\ \cos(2\theta_2) - \cos(2\theta_3) & \cos(2\theta_3) - \cos(2\theta_1) & \cos(2\theta_1) - \cos(2\theta_2) \end{bmatrix}. \quad (\text{A6})$$

Note that the matrix  $\bar{A}$  and the matrix inverse  $\bar{A}^{-1}$  are not functions of range but only of the selected receiver polarizations.

The term

$$\zeta = \cos(2\theta_3) \left( \sin(2\theta_2) - \sin(2\theta_1) \right) + \cos(2\theta_1) \left( \sin(2\theta_3) - \sin(2\theta_2) \right) + \cos(2\theta_2) \left( \sin(2\theta_1) - \sin(2\theta_3) \right) \quad (\text{A7})$$

is introduced in Eq. A6 as a constraint on the validity of the inversion where  $\zeta = 0$  results in a degenerate inversion because of receiver polarization selection. This happens for example when two angles are equal or  $180^\circ$  separated.

Volume depolarization,

$$d(R, \theta_i) - 1 = \frac{F_{33}(R, \theta_i)}{F_{11}(R, \theta_i)} = \frac{(\cos(2\theta_3) - \cos(2\theta_2)) N_1(R) + (\cos(2\theta_1) - \cos(2\theta_3)) N_2(R) + (\cos(2\theta_2) - \cos(2\theta_1)) N_3(R)}{\sin(2\theta_2 - 2\theta_3) N_1(R) + \sin(2\theta_3 - 2\theta_1) N_2(R) + \sin(2\theta_1 - 2\theta_2) N_3(R)} \quad (\text{A8})$$

and volume diattenuation,

$$D(R, \theta_i) = \frac{F_{12}(R, \theta_i)}{F_{11}(R, \theta_i)} = \frac{(\sin(2\theta_3) - \sin(2\theta_2)) N_1(R) + (\sin(2\theta_1) - \sin(2\theta_3)) N_2(R) + (\sin(2\theta_2) - \sin(2\theta_1)) N_3(R)}{\sin(2\theta_2 - 2\theta_3) N_1(R) + \sin(2\theta_3 - 2\theta_1) N_2(R) + \sin(2\theta_1 - 2\theta_2) N_3(R)} \quad (\text{A9})$$

can be expressed in terms of arbitrary observation angles assuming the condition  $\zeta \neq 0$  (for CAPABL  $\zeta \approx -2$  calculated from receiver polarizations via atmospheric calibration performed for each measurement).

## Appendix B: CAPABL's Nonlinear Photon Counting

- 15 CAPABL's photon counting system is subject to pulse pileup, as is the case with most photon counting systems. This pileup results in detector pulses occurring too close in time for the counting system to uniquely identify individual pulses, resulting in systematic underrepresentation of photon count rate. The models introduced to correct this problem are based on the work of Donovan et al. (1993); Whiteman (2003); Liu et al. (2009) using a calibration data set taken during a clean air period at Summit in May 2015. The neutral-density filter was removed from the receiver optical path on a clear air day to increase the observed
- 20 count rate and also extend the vertical range of calibration data. Data were concatenated based on the work of Newsom et al.

(2009) with the main difference being that profiles were background subtracted before analysis (note that this is the only case in this manuscript where such concatenation is performed). From these data, the analog profile is taken as the ideal count rate. These data are plotted in Fig. A1 with two correction methods fit to the data using a Levenberg-Marquardt nonlinear least squares solver. These saturation models are given as

$$5 \quad S_{obs} = \frac{S_0}{1 + \tau_{NP} S_0} \quad (B1)$$

and

$$S_{obs} = S_0 \exp(\tau_P S_0) \quad (B2)$$

referred to as non-paralyzable and paralyzable, respectively. The fit parameter for non-paralyzable is the deadtime  $\tau_{NP}$  and for paralyzable  $\tau_P$ .

10 To convert from the observed photon count number to observed photon count rate, the simple linear transformation

$$N_{obs} = S_{obs} \times S_{PP} \times T_{PB} \quad (B3)$$

is used where  $N_{obs}$  is the observed photon count number per bin,  $S_{obs}$  is the observed photon count rate per shot,  $S_{PP}$  is the number of laser shots integrated per profile, and  $T_{PB}$  is the two way travel time of light per range bin.

15 Inserting Eq. B3 into Eq. B1 and performing a propagation of error analysis, based on Taylor series expansion for standard error propagation assuming no data covariance, yields the shot noise error for the corrected photon count number per bin given as

$$\sigma_N = S_{PP} T_{PB} \sqrt{\frac{N_{obs}^4 \sigma_{\tau_{NP}}^2 + S_{PP}^2 T_{PB}^2 \sigma_{N_{obs}}^2}{(S_{PP} T_{PB} - \tau_{NP} N_{obs})^4}}. \quad (B4)$$

20 Equation B4 indicates that the error in corrected photon count rate is a function of the count error  $\sigma_{N_{obs}}$ , which conform to Poisson statistics, and the error in the model fit parameter  $\tau_{NP}$ . This error is estimated during the fitting procedure using the fit confidence bounds. Note that if and only if  $\tau_{NP}$  is exactly zero (i.e.  $\tau_{NP} = 0$  and  $\sigma_{\tau_{NP}} = 0$ ) will the counting error be simply  $\sigma_{N_{obs}}$ .

25 The calibration data used for this analysis is presented in Fig. A1. As each measurement is subject to some measurement error, Poisson counting error for photon counting and electrical noise for the analog detection, this fit was calculated using the SNR as a data weight such that higher SNR data are given higher weights. The results of this weighted analysis indicate that the dead time is approximately 0.1 ns higher than the unweighted analysis which ignores measurement errors in the fit.

### Appendix C: [Interpretation of Liquid, Ice, and Clear Air Voxels from CAPABL's First 4 Months](#)

[To add to the analysis presented in Fig. 3, a complete box and whisker plot for liquid, ice, and clear air is given in Fig. A2. Note here that randomly oriented ice crystals and horizontally oriented ice crystals are both included as ice. Figure A2 indicates 3](#)

prominent features. First, as mentioned in the main text, the median altitude of liquid voxels is not constant between analog, photon counting, and saturation corrected photon counting (SCPC) for either orthogonal or non-orthogonal retrievals. The second feature is seen in the clear sky data where there is increased sensitivity of the photon counting channel over the analog channel and increased sensitivity of the non-orthogonal polarization retrievals over the orthogonal versions. This increased sensitivity is seen by the increase in whisker range of approximately 1 km (0.96 km, 0.70 km, 0.34 km, and 0.55 km for July, August, September, and October for saturation corrected photon counting and analog to the 95th percentile, respectively, or 1.17 km, 1.12 km, 0.99 km, and 0.83 km to the inner fence) indicating the presence of more high altitude clear air voxels that pass the quality control standards specified in Table 2. As a result of the increased sensitivity, the median altitude of the clear-sky data shifts upwards as well (0.29 km, 0.29 km, 0.36 km, and 0.31 km for July, August, September, and October for SCPC, respectively). The final feature is the relative consistency of the occurrence of ice for all methods. The median altitude of the ice-identified data shifts slightly upwards again due to increased sensitivity between analog and photon counting (0.05 km, 0.23 km, 0.36 km, and 0.23 km for July, August, September, and October for saturation corrected photon counting and analog, respectively) but the boxes cover similar altitude ranges, especially for July. Comparing the whiskers for the non-orthogonal and orthogonal polarization retrievals within a month indicates that the increased sensitivity gained by using non-orthogonal polarization retrievals does not change the geophysical interpretation of the ice-identified data when saturation is of little concern (shifts of 0.26 km, 0.08 km, 0.21 km, and 0.10 km for July, August, September, and October for analog to the 95th percentile, respectively, or 0.18 km, 0.13 km, 0.21 km, and 0.18 km to the inner fence are observed), i.e. when signals are of similar strength or when signal rates are less than or on the order of approximately 1 MHz.

*Author contributions.* R. Stillwell (RS) developed the processing code for CAPABL and MPL data, the data merging procedure, and performed the multi-sensor validation and radiation analysis. M. Shupe (MS) provided MMCR data. D. Turner (DT) provided the MWR and MPL raw data and performed the MWR optimal estimation retrievals. J. Thayer (JT) and Ryan Neely (RN) served as advisors for RS for CAPABL specific technical tasks and RN, MS, and DT contributed scientific context. The ICECAPS instrument is maintained by technicians from Polar Field services in close coordination with RS, RN, MS, and DT. RS prepared the manuscript with contributions from RN, JT, MS, and DT.

*Competing interests.* The authors declare no competing interests.

*Acknowledgements.* This material is based upon work supported by the National Science Foundation Graduate Research Fellowship Program under grant DGE 1144083 and National Science Foundation grants AON 1303864, PLR-1303864, PLR-1303879, PLR-1314156, and ATM-0454999. [The National Center for Atmospheric Research is sponsored by the National Science Foundation.](#) Ryan Neely is funded by the National Centre for Atmospheric Science. The authors would like to thank the staff and science technicians at Summit, especially Hannah James and Samuel Dorsi, as well as Polar Field Services for their support and dedication to help collect data and maintain instrumentation. The



authors would also like to thank David Longenecker for providing radiation data. ICECAPS MPL data was provided by the US Department of Energy Atmospheric Radiation Measurement Program while MMCR data was provided by the NOAA Earth System Research Laboratory.

## References

- Albrecht, B. and Cox, S. K.: Procedures for Improving Pyrgeometer Performance, *Journal of Applied Meteorology*, 16, 188–197, [https://doi.org/10.1175/1520-0450\(1977\)016<0190:PFIPP>2.0.CO;2](https://doi.org/10.1175/1520-0450(1977)016<0190:PFIPP>2.0.CO;2), 1977.
- Alvarez, J. M., Vaughan, M. A., Hostetler, C. A., Hunt, W. H., and Winker, D. M.: Calibration Technique for Polarization-Sensitive Lidars, *Journal of Atmospheric and Oceanic Technology*, 23, 683–699, <https://doi.org/10.1175/JTECH1872.1>, <https://doi.org/10.1175/JTECH1872.1>, 2006.
- Bendix, J.: A satellite-based climatology of fog and low-level stratus in Germany and adjacent areas, *Atmospheric Research*, 64, 3 – 18, [https://doi.org/http://dx.doi.org/10.1016/S0169-8095\(02\)00075-3](https://doi.org/http://dx.doi.org/10.1016/S0169-8095(02)00075-3), <http://www.sciencedirect.com/science/article/pii/S0169809502000753>, 2nd International Conference on Fog and Fog Collection, 2002.
- 10 Bennartz, R., Shupe, M. D., Turner, D. D., Walden, V. P., Steffen, K., Cox, C. J., Kulie, M. S., Miller, N. B., and Pettersen, C.: July 2012 Greenland melt extent enhanced by low-level liquid clouds, *Nature*, 496, 83–86, <http://dx.doi.org/10.1038/nature12002>, 2013.
- Biele, J., Beyerle, G., and Baumgarten, G.: Polarization Lidar: Correction of instrumental effects, *Opt. Express*, 7, 427–435, <https://doi.org/10.1364/OE.7.000427>, <http://www.opticsexpress.org/abstract.cfm?URI=oe-7-12-427>, 2000.
- Cadeddu, M. P., Liljegren, J. C., and Turner, D. D.: The Atmospheric radiation measurement (ARM) program network of microwave radiometers: instrumentation, data, and retrievals, *Atmospheric Measurement Techniques*, 6, 2359–2372, 2013.
- 15 Campbell, J. R., Hlavka, D. L., Welton, E. J., Flynn, C. J., Turner, D. D., Spinhirne, J. D., III, V. S. S., and Hwang, I. H.: Full-Time, Eye-Safe Cloud and Aerosol Lidar Observation at Atmospheric Radiation Measurement Program Sites: Instruments and Data Processing, *Journal of Atmospheric and Oceanic Technology*, 19, 431–442, 2002.
- Cesana, G. and Chepfer, H.: Evaluation of the cloud thermodynamic phase in a climate model using CALIPSO-GOCCP, *Journal of Geophysical Research: Atmospheres*, 118, 7922–7937, <https://doi.org/10.1002/jgrd.50376>, <http://dx.doi.org/10.1002/jgrd.50376>, 2013.
- 20 Cesana, G., Kay, J. E., Chepfer, H., English, J. M., and de Boer, G.: Ubiquitous low-level liquid-containing Arctic clouds: New observations and climate model constraints from CALIPSO-GOCCP, *Geophysical Research Letters*, 39, n/a–n/a, <https://doi.org/10.1029/2012GL053385>, <http://dx.doi.org/10.1029/2012GL053385>, 120804, 2012.
- Clothiaux, E. E., Moran, K. P., Martner, B. E., Ackerman, T. P., Mace, G. G., Uttal, T., Mather, J. H., Widener, K. B., Miller, M. A., and Rodriguez, D. J.: The Atmospheric Radiation Measurement Program Cloud Radars: Operational Modes, *Journal of Atmospheric and Oceanic Technology*, 16, 819–827, [https://doi.org/10.1175/1520-0426\(1999\)016<0819:TARMPC>2.0.CO;2](https://doi.org/10.1175/1520-0426(1999)016<0819:TARMPC>2.0.CO;2), [http://dx.doi.org/10.1175/1520-0426\(1999\)016<0819:TARMPC>2.0.CO;2](http://dx.doi.org/10.1175/1520-0426(1999)016<0819:TARMPC>2.0.CO;2), 1999.
- 25 Curry, J. A., Schramm, J. L., Rossow, W. B., and Randall, D.: Overview of Arctic Cloud and Radiation Characteristics, *Journal of Climate*, 9, 1731–1764, [https://doi.org/10.1175/1520-0442\(1996\)009<1731:OOACAR>2.0.CO;2](https://doi.org/10.1175/1520-0442(1996)009<1731:OOACAR>2.0.CO;2), [http://dx.doi.org/10.1175/1520-0442\(1996\)009<1731:OOACAR>2.0.CO;2](http://dx.doi.org/10.1175/1520-0442(1996)009<1731:OOACAR>2.0.CO;2), 1996.
- 30 de Boer, G., Eloranta, E. W., and Shupe, M. D.: Arctic Mixed-Phase Stratiform Cloud Properties from Multiple Years of Surface-Based Measurements at Two High-Latitude Locations, *Journal of the Atmospheric Sciences*, 66, 2874–2887, <https://doi.org/10.1175/2009JAS3029.1>, <http://dx.doi.org/10.1175/2009JAS3029.1>, 2009.
- Di, H., Hua, H., Cui, Y., Hua, D., Li, B., and Song, Y.: Correction technology of a polarization lidar with a complex optical system, *J. Opt. Soc. Am. A*, 33, 1488–1494, <https://doi.org/10.1364/JOSAA.33.001488>, <http://josaa.osa.org/abstract.cfm?URI=josaa-33-8-1488>, 2016.
- Donovan, D. P., Whiteway, J. A., and Carswell, A. I.: Correction for nonlinear photon-counting effects in lidar systems, *Appl Opt*, 32, 6742–53, 1993.

- Flynn, C. J., Mendoza, A., Zheng, Y., and Mathur, S.: Novel polarization-sensitive micropulse lidar measurement technique, *Opt. Express*, 15, 2785–2790, <https://doi.org/10.1364/OE.15.002785>, <http://www.opticsexpress.org/abstract.cfm?URI=oe-15-6-2785>, 2007.
- Freudenthaler, V.: About the effects of polarising optics on lidar signals and the  $\Delta 90$  calibration, *Atmos. Meas. Tech.*, 9, 4181–4255, <https://doi.org/10.5194/amt-9-4181-2016>, <http://www.atmos-meas-tech.net/9/4181/2016/>, 2016.
- 5 Freudenthaler, V., Esselborn, M., Wiegner, M., Heese, B., Tesche, M., Ansmann, A., Mueller, D., Althausen, D., Wirth, M., Fix, A., Ehret, G., Knippertz, P., Toledano, C., Gasteiger, J., Garhammer, M., and Seefeldner, M.: Depolarization ratio profiling at several wavelengths in pure Saharan dust during SAMUM 2006, *Tellus B*, 61, 165–179, <https://doi.org/10.1111/j.1600-0889.2008.00396.x>, <http://dx.doi.org/10.1111/j.1600-0889.2008.00396.x>, 2009.
- Fujii, T. and Fukuchi, T., eds.: *Laser Remote Sensing*, Taylor and Francis Group, 2005.
- 10 Gimmestad, G. G.: Reexamination of depolarization in lidar measurements, *Appl. Opt.*, 47, 3795–3802, <https://doi.org/10.1364/AO.47.003795>, 2008.
- Gregory, J. M., Huybrechts, P., and Raper, S. C. B.: Climatology: Threatened loss of the Greenland ice-sheet, *Nature*, 428, 616–616, <http://dx.doi.org/10.1038/428616a>, 2004.
- Groß, S., Freudenthaler, V., Wirth, M., and Weinzierl, B.: Towards an aerosol classification scheme for future EarthCARE lidar observations and implications for research needs, *Atmospheric Science Letters*, 16, 77–82, <https://doi.org/10.1002/asl2.524>, <http://dx.doi.org/10.1002/asl2.524>, 2015.
- 15 Hansen, J., Sato, M., Kharecha, P., and von Schuckmann, K.: Earth’s energy imbalance and implications, *Atmospheric Chemistry and Physics*, 11, 13 421–13 449, 2011.
- Hayman, M. and Thayer, J. P.: Explicit description of polarization coupling in lidar applications, *Opt Lett*, 34, 611–3, 2009.
- 20 Hayman, M. and Thayer, J. P.: General description of polarization in lidar using Stokes vectors and polar decomposition of Mueller matrices, *J Opt Soc Am A Opt Image Sci Vis*, 29, 400–9, 2012.
- Hoffmann, A., Ritter, C., Stock, M., Shiobara, M., Lampert, A., Maturilli, M., Orgis, T., Neuber, R., and Herber, A.: Ground-based lidar measurements from Ny-Ålesund during ASTAR 2007, *Atmos. Chem. Phys.*, 9, 9059–9081, <https://doi.org/10.5194/acp-9-9059-2009>, 2009.
- 25 Intrieri, J. M., Shupe, M. D., Uttal, T., and McCarty, B. J.: An annual cycle of Arctic cloud characteristics observed by radar and lidar at SHEBA, *Journal of Geophysical Research: Oceans*, 107, SHE 5–1–SHE 5–15, <https://doi.org/10.1029/2000JC000423>, <http://dx.doi.org/10.1029/2000JC000423>, 2002.
- Kaul, B. V., Samokhvalov, I. V., and Volkov, S. N.: Investigating Particle Orientation in Cirrus Clouds by Measuring Backscattering Phase Matrices with Lidar, *Appl. Opt.*, 43, 6620–6628, <https://doi.org/10.1364/AO.43.006620>, <http://ao.osa.org/abstract.cfm?URI=ao-43-36-6620>,  
30 2004.
- Kay, J. E., Bourdages, L., Miller, N. B., Morrison, A., Yettella, V., Chepfer, H., and Eaton, B.: Evaluating and improving cloud phase in the Community Atmosphere Model version 5 using spaceborne lidar observations, *Journal of Geophysical Research: Atmospheres*, 121, 4162–4176, <https://doi.org/10.1002/2015JD024699>, <http://dx.doi.org/10.1002/2015JD024699>, 2015JD024699, 2016.
- Kjeldsen, K. K., Korsgaard, N. J., Bjørk, A. A., Khan, S. A., Box, J. E., Funder, S., Larsen, N. K., Bamber, J. L., Colgan, W., van den  
35 Broeke, M., Siggaard-Andersen, M.-L., Nuth, C., Schomacker, A., Andresen, C. S., Willerslev, E., and Kjær, K. H.: Spatial and temporal distribution of mass loss from the Greenland Ice Sheet since AD 1900, *Nature*, 528, 396–400, 2015.
- Klett, J. D.: Stable analytical inversion solution for processing lidar returns, *Appl. Opt.*, 20, 211–220, <https://doi.org/10.1364/AO.20.000211>, <http://ao.osa.org/abstract.cfm?URI=ao-20-2-211>, 1981.

- Liu, Z., Li, Z., Liu, B., and Li, R.: Analysis of saturation signal correction of the troposphere lidar, *Chinese Optics Letters*, pp. 1051–1054, 2009.
- Measures, R. M.: *Laser Remote Sensing: Fundamentals and Applications*, John Wiley and Sons, 6000 Broken Sound Parkway NW, Suite 300, Boca Raton, FL 33487-2742, USA, 1984.
- 5 Miller, N. B., Shupe, M. D., Cox, C. J., Walden, V. P., Turner, D. D., and Steffen, K.: Cloud Radiative Forcing at Summit Greenland, *Journal of Climate*, 28, 6267–6280, 2015.
- Miller, N. B., Shupe, M. D., Cox, C. J., Noone, D., Persson, P. O. G., and Steffen, K.: Surface Energy Budget Responses to Radiative Forcing at Summit, Greenland, *The Cryosphere*, 11, 497–516, <https://doi.org/10.5194/tc-11-497-2017>, 2017.
- Mishchenko, M. I. and Hovenier, J. W.: Depolarization of light backscattered by randomly oriented nonspherical particles, *Opt. Lett.*, 20, 1356–1358, <https://doi.org/10.1364/OL.20.001356>, 1995.
- 10 Moran, K. P., Martner, B. E., Post, M. J., Kropfli, R. A., Welsh, D. C., and Widener, K. B.: An Unattended Cloud-Profiling Radar for Use in Climate Research, *Bulletin of the American Meteorological Society*, 79, 443–455, [https://doi.org/10.1175/1520-0477\(1998\)079<0443:AUCPRF>2.0.CO;2](https://doi.org/10.1175/1520-0477(1998)079<0443:AUCPRF>2.0.CO;2), [http://dx.doi.org/10.1175/1520-0477\(1998\)079<0443:AUCPRF>2.0.CO;2](http://dx.doi.org/10.1175/1520-0477(1998)079<0443:AUCPRF>2.0.CO;2), 1998.
- Morrison, H., de Boer, G., Feingold, G., Harrington, J., Shupe, M. D., and Sulia, K.: Resilience of persistent Arctic mixed-phase clouds, 15 *Nature Geoscience*, 5, 11–17, <http://dx.doi.org/10.1038/ngeo1332>, 2012.
- Neely, R. R., Hayman, M., Stillwell, R. A., Thayer, J. P., Hardesty, R. M., O'Neill, M., Shupe, M. D., and Alvarez, C.: Polarization Lidar at Summit, Greenland for the Detection of Cloud Phase and Particle Orientation, *Journal of Atmospheric and Oceanic Technology*, 30, 1635–1655, <https://doi.org/10.1175/JTECH-D-12-00101.1>, <http://dx.doi.org/10.1175/JTECH-D-12-00101.1>, 2013.
- Newsom, R. K., Turner, D. D., Mielke, B., Clayton, M., Ferrare, R., and Sivaraman, C.: Simultaneous analog and photon counting detection 20 for Raman lidar, *Appl. Opt.*, 48, 3903–3914, <https://doi.org/10.1364/AO.48.003903>, <http://ao.osa.org/abstract.cfm?URI=ao-48-20-3903>, 2009.
- Nott, G. J. and Duck, T. J.: Lidar studies of the polar troposphere, *Meteorological Applications*, 18, 383–405, <https://doi.org/10.1002/met.289>, <http://dx.doi.org/10.1002/met.289>, 2011.
- Pettersen, C., Bennartz, R., Kulie, M. S., Merrelli, A. J., Shupe, M. D., and Turner, D. D.: Microwave signatures of ice hydrometeors from 25 ground-based observations above Summit, Greenland, *Atmospheric Chemistry and Physics*, 16, 4743–4756, <https://doi.org/10.5194/acp-16-4743-2016>, 2016.
- Pithan, F., Medeiros, B., and Mauritsen, T.: Mixed-phase clouds cause climate model biases in Arctic wintertime temperature inversions, *Climate Dynamics*, 43, 289–303, <https://doi.org/10.1007/s00382-013-1964-9>, <http://dx.doi.org/10.1007/s00382-013-1964-9>, 2014.
- Sassen, K.: The Polarization Lidar Technique for Cloud Research: A Review and Current Assessment, *Bulletin of the American Meteorological Society*, 72, 1848–1866, 1991.
- 30 Schotland, R. M., Sassen, K., and Stone, R.: Observations by Lidar of Linear Depolarization Ratios for Hydrometeors, *Journal of Applied Meteorology*, 10, 1011–1017, [https://doi.org/10.1175/1520-0450\(1971\)010<1011:OBLOLD>2.0.CO;2](https://doi.org/10.1175/1520-0450(1971)010<1011:OBLOLD>2.0.CO;2), [http://dx.doi.org/10.1175/1520-0450\(1971\)010<1011:OBLOLD>2.0.CO;2](http://dx.doi.org/10.1175/1520-0450(1971)010<1011:OBLOLD>2.0.CO;2), 1971.
- Sherwood, S. C., Bony, S., and Dufresne, J.-L.: Spread in model climate sensitivity traced to atmospheric convective mixing, *Nature*, 505, 37–42, 2014.
- 35 Shupe, M. D.: Clouds at Arctic Atmospheric Observatories. Part II: Thermodynamic Phase Characteristics, *Journal of Applied Meteorology and Climatology*, 50, 645–661, <https://doi.org/10.1175/2010JAMC2468.1>, <http://dx.doi.org/10.1175/2010JAMC2468.1>, 2011.

- Shupe, M. D. and Intrieri, J. M.: Cloud Radiative Forcing of the Arctic Surface: The Influence of Cloud Properties, Surface Albedo, and Solar Zenith Angle, *Journal of Climate*, 17, 616–628, [https://doi.org/10.1175/1520-0442\(2004\)017<0616:CRFOTA>2.0.CO;2](https://doi.org/10.1175/1520-0442(2004)017<0616:CRFOTA>2.0.CO;2), [http://dx.doi.org/10.1175/1520-0442\(2004\)017<0616:CRFOTA>2.0.CO;2](http://dx.doi.org/10.1175/1520-0442(2004)017<0616:CRFOTA>2.0.CO;2), 2004.
- Shupe, M. D., Matrosov, S. Y., and Uttal, T.: Arctic Mixed-Phase Cloud Properties Derived from Surface-Based Sensors at SHEBA, *Journal of the Atmospheric Sciences*, 63, 697–711, <https://doi.org/10.1175/JAS3659.1>, <http://dx.doi.org/10.1175/JAS3659.1>, 2006.
- Shupe, M. D., Daniel, J. S., de Boer, G., Eloranta, E. W., Kollias, P., Luke, E. P., Long, C. N., Turner, D. D., and Verlinde, J.: A Focus On Mixed-Phase Clouds, *Bulletin of the American Meteorological Society*, 89, 1549–1562, 2008.
- Shupe, M. D., Turner, D. D., Walden, V. P., Bennartz, R., Cadeddu, M. P., Castellani, B. B., Cox, C. J., Hudak, D. R., Kulie, M. S., Miller, N. B., Neely, R. R., Neff, W. D., and Rowe, P. M.: High and Dry: New Observations of Tropospheric and Cloud Properties above the Greenland Ice Sheet, *Bulletin of the American Meteorological Society*, 94, 169–186, <https://doi.org/10.1175/BAMS-D-11-00249.1>, <http://dx.doi.org/10.1175/BAMS-D-11-00249.1>, 2013.
- Stevens, B. and Bony, S.: Water in the Atmosphere, *Physics Today*, pp. 29–34, 2013.
- Tan, I., Storelvmo, T., and Zelinka, M. D.: Observational constraints on mixed-phase clouds imply higher climate sensitivity, *Science*, 352, 224–227, 2016.
- Thomas, L., Cartwright, J. C., and Wareing, D. P.: Lidar observations of the horizontal orientation of ice crystals in cirrus clouds, *Tellus B*, 42, 211–216, <https://doi.org/10.1034/j.1600-0889.1990.00001.x-i1>, <http://dx.doi.org/10.1034/j.1600-0889.1990.00001.x-i1>, 1990.
- Turner, D. D.: Arctic Mixed-Phase Cloud Properties from AERI Lidar Observations: Algorithm and Results from SHEBA, *Journal of Applied Meteorology*, 44, 427–444, <https://doi.org/10.1175/JAM2208.1>, <http://dx.doi.org/10.1175/JAM2208.1>, 2005.
- Van De Hulst, H.: *Light Scattering By Small Particles*, John Wiley and Sons, 1957.
- Van Tricht, K., Lhermitte, S., Lenaerts, J. T. M., Gorodetskaya, I. V., L’Ecuyer, T. S., Noel, B., van den Broeke, M. R., Turner, D. D., and van Lipzig, N. P. M.: Clouds enhance Greenland ice sheet meltwater runoff, *Nat Commun*, 7, <http://dx.doi.org/10.1038/ncomms10266>, 2016.
- Verlinde, J., Harrington, J. Y., Yannuzzi, V. T., Avramov, A., Greenberg, S., Richardson, S. J., Bahrman, C. P., McFarquhar, G. M., Zhang, G., Johnson, N., Poellot, M. R., Mather, J. H., Turner, D. D., Eloranta, E. W., Tobin, D. C., Holz, R., Zak, B. D., Ivey, M. D., Prenni, A. J., DeMott, P. J., Daniel, J. S., Kok, G. L., Sassen, K., Spangenberg, D., Minnis, P., Tooman, T. P., Shupe, M., Heymsfield, A. J., and Schofield, R.: The Mixed-Phase Arctic Cloud Experiment, *Bulletin of the American Meteorological Society*, 88, 205–221, <https://doi.org/10.1175/BAMS-88-2-205>, <https://doi.org/10.1175/BAMS-88-2-205>, 2007.
- Verlinde, J., Zak, B. D., Shupe, M. D., Ivey, M. D., and Stamnes, K.: The ARM North Slope of Alaska (NSA) Sites, *Meteorological Monographs*, 57, 8.1–8.13, <https://doi.org/10.1175/AMSMONOGRAPHIS-D-15-0023.1>, <http://dx.doi.org/10.1175/AMSMONOGRAPHIS-D-15-0023.1>, 2016.
- Weitkamp, C., ed.: *Lidar Range-Resolved Optical Remote Sensing of the Atmosphere*, vol. 102, Springer, 233 Spring Street, New York, NY 10013, USA, 2005.
- Westbrook, C. D., Illingworth, A. J., O’Connor, E. J., and Hogan, R. J.: Doppler lidar measurements of oriented planar ice crystals falling from supercooled and glaciated layer clouds, *Quarterly Journal of the Royal Meteorological Society*, 136, 260–276, <https://doi.org/10.1002/qj.528>, <http://dx.doi.org/10.1002/qj.528>, 2010.
- Whiteman, D. N.: Examination of the Traditional Raman Lidar Technique. I. Evaluating the Temperature-Dependent Lidar Equations, *Appl. Opt.*, 42, 2571–2592, <https://doi.org/10.1364/AO.42.002571>, <http://ao.osa.org/abstract.cfm?URI=ao-42-15-2571>, 2003.

- Whiteman, D. N., Melfi, S. H., and Ferrare, R. A.: Raman lidar system for the measurement of water vapor and aerosols in the Earth's atmosphere, *Appl. Opt.*, 31, 3068–3082, <https://doi.org/10.1364/AO.31.003068>, <http://ao.osa.org/abstract.cfm?URI=ao-31-16-3068>, 1992.
- Winker, D. M., Vaughan, M. A., Omar, A., Hu, Y., Powell, K. A., Liu, Z., Hunt, W. H., and Young, S. A.: Overview of the CALIPSO Mission and CALIOP Data Processing Algorithms, *Journal of Atmospheric and Oceanic Technology*, 26, 2310–2323, 2009.
- 5 Zuidema, P., Baker, B., Han, Y., Intrieri, J., Key, J., Lawson, P., Matrosov, S., Shupe, M., Stone, R., and Uttal, T.: An Arctic Springtime Mixed-Phase Cloudy Boundary Layer Observed during SHEBA, *Journal of the Atmospheric Sciences*, 62, 160–176, <https://doi.org/10.1175/JAS-3368.1>, <http://dx.doi.org/10.1175/JAS-3368.1>, 2005.

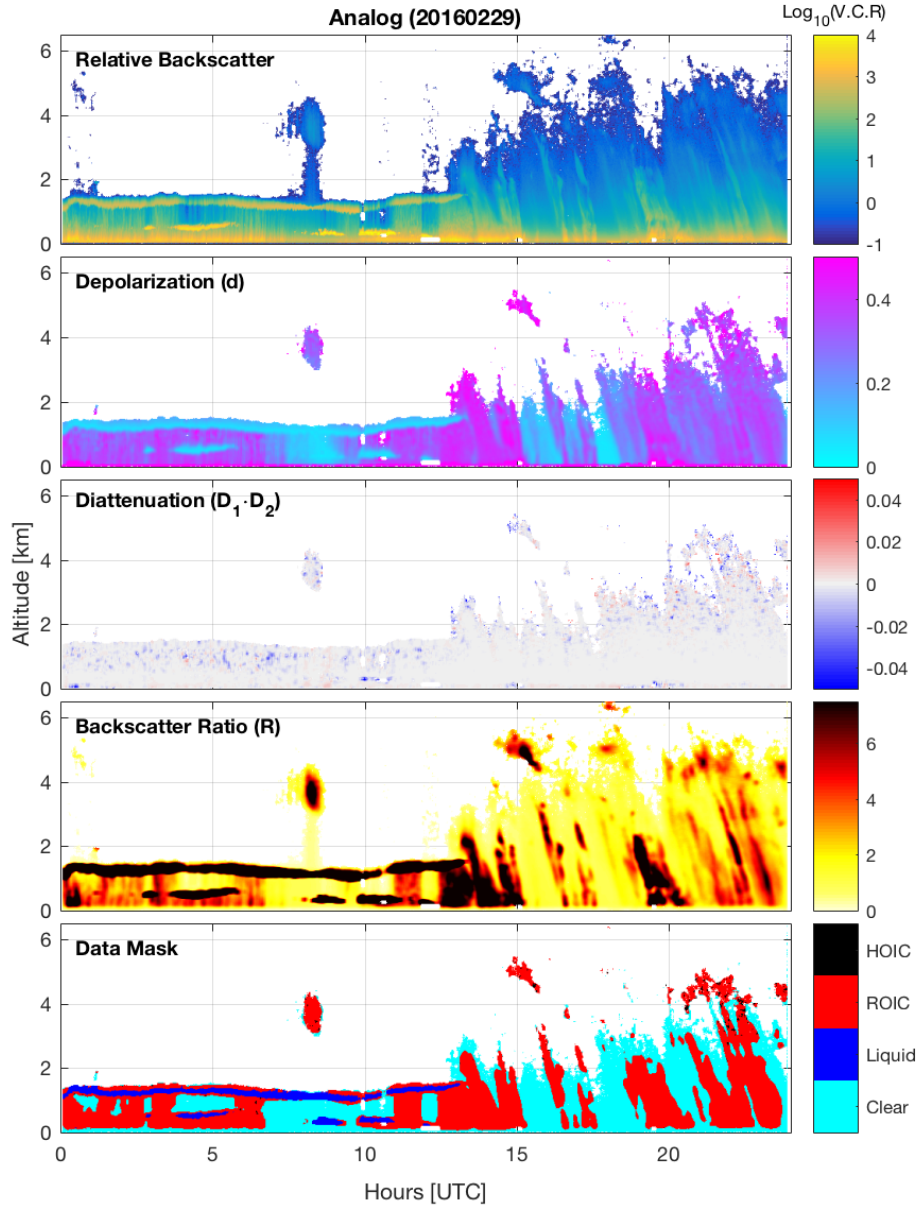

**Figure 1.** Analog data from the CAPABL system for February 29, 2016. Relative Backscatter is the summation of background subtracted parallel and perpendicular voltages converted to a virtual count rate (V.C.R.) in MHz. ~~The total backscatter color bar is given from 100 to 250 on a logarithmic scale.~~ Depolarization is calculated as given in Eq. 2. Diattenuation is calculated as given in Eq. 3 and multiplied to  $D_1 D_2$ . Backscatter ratio is calculated by performing a Klett inversion and using ICECAPS radiosonde data (launched at 2400 UTC and 1200 UTC daily) to calculate a molecular extinction component (Klett, 1981). The data mask given is calculated using rules described in Sect. 3.

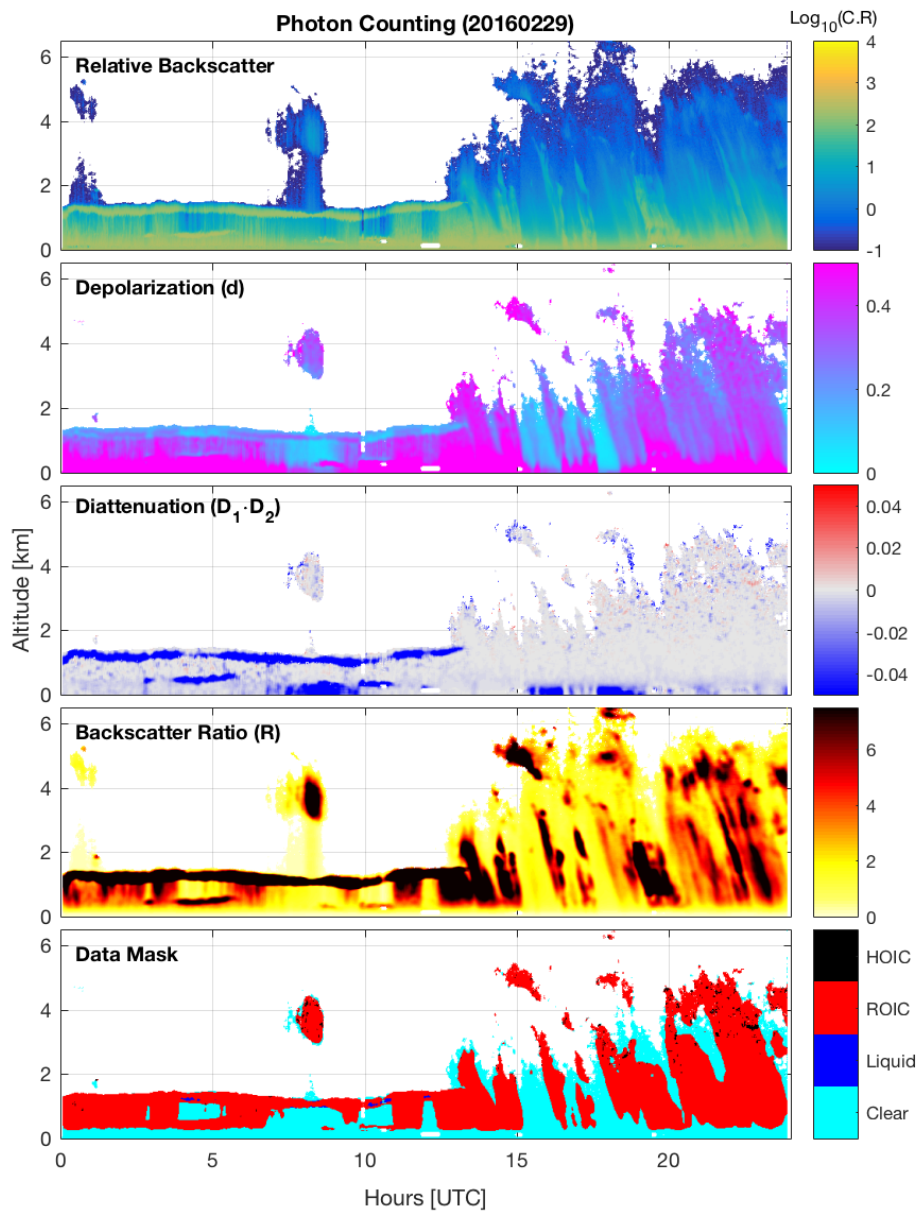

**Figure 2.** Same as Fig. 1 except photon counting data are shown.



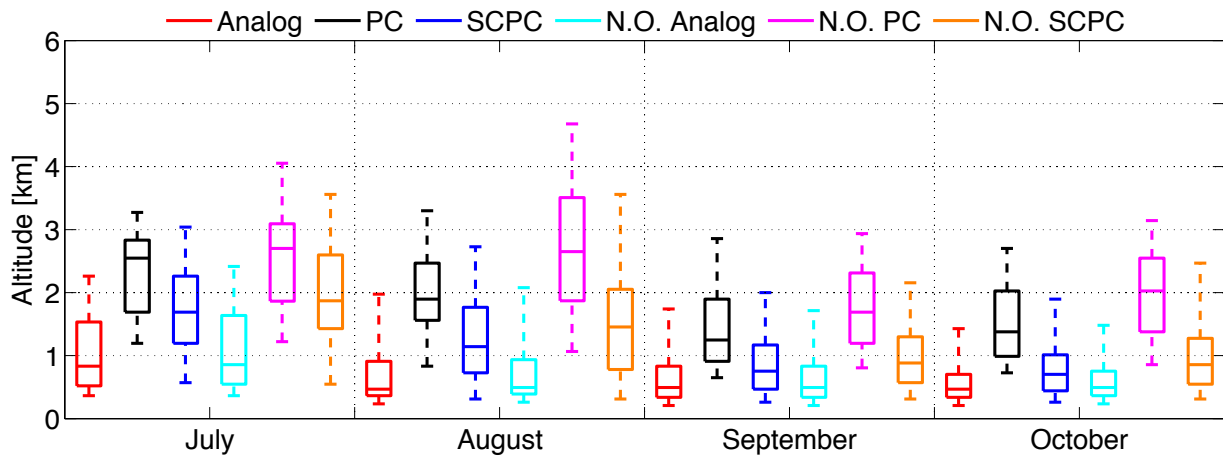

**Figure 3.** CAPABL [binned liquid](#) data from July 2015 to October [2015 binned into liquid, ice, or clear air. 2015](#). The median is indicated by a line through the box, the 25th to 75th percentile ranges complete the box and the whiskers extend to the 5th and 95th percentiles. PC, SCPC, and N.O. stand for photon counting, saturation photon counting, and non-orthogonal, respectively. [The channel sensitivity can be seen looking at the clear voxels where analog is expected to be less sensitive than PC and orthogonal less sensitive than non-orthogonal.](#)

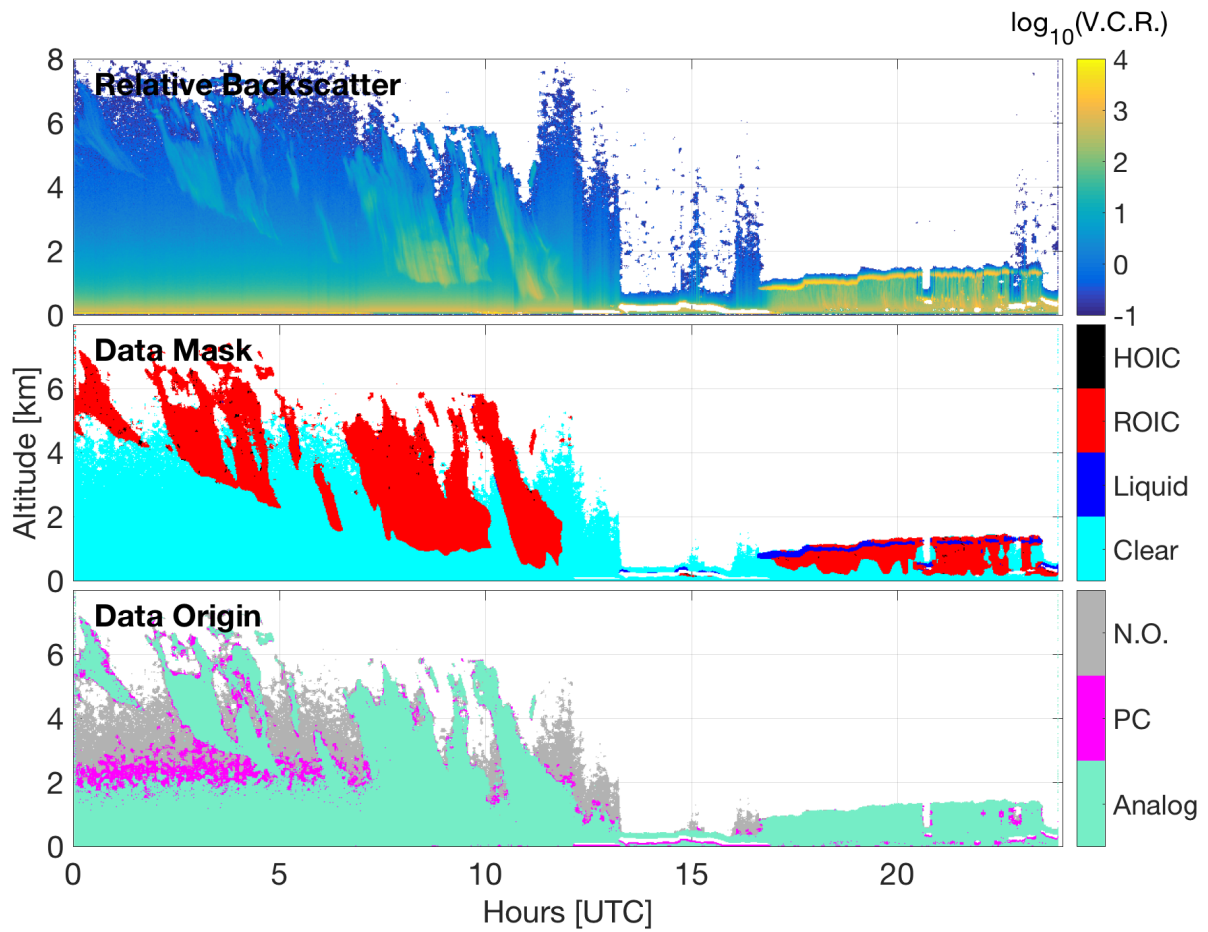

**Figure 4.** A sample of the CAPABL merged data product from August 22, 2016. The top panel shows total analog backscatter for the whole day in log base 10 signal intensity. The middle panel shows the merged data product. The bottom panel shows the origin of each voxel. Analog indicates orthogonal processing with analog data, PC indicates orthogonal processing with photon counting data. All non-orthogonal types are lumped together as N.O.

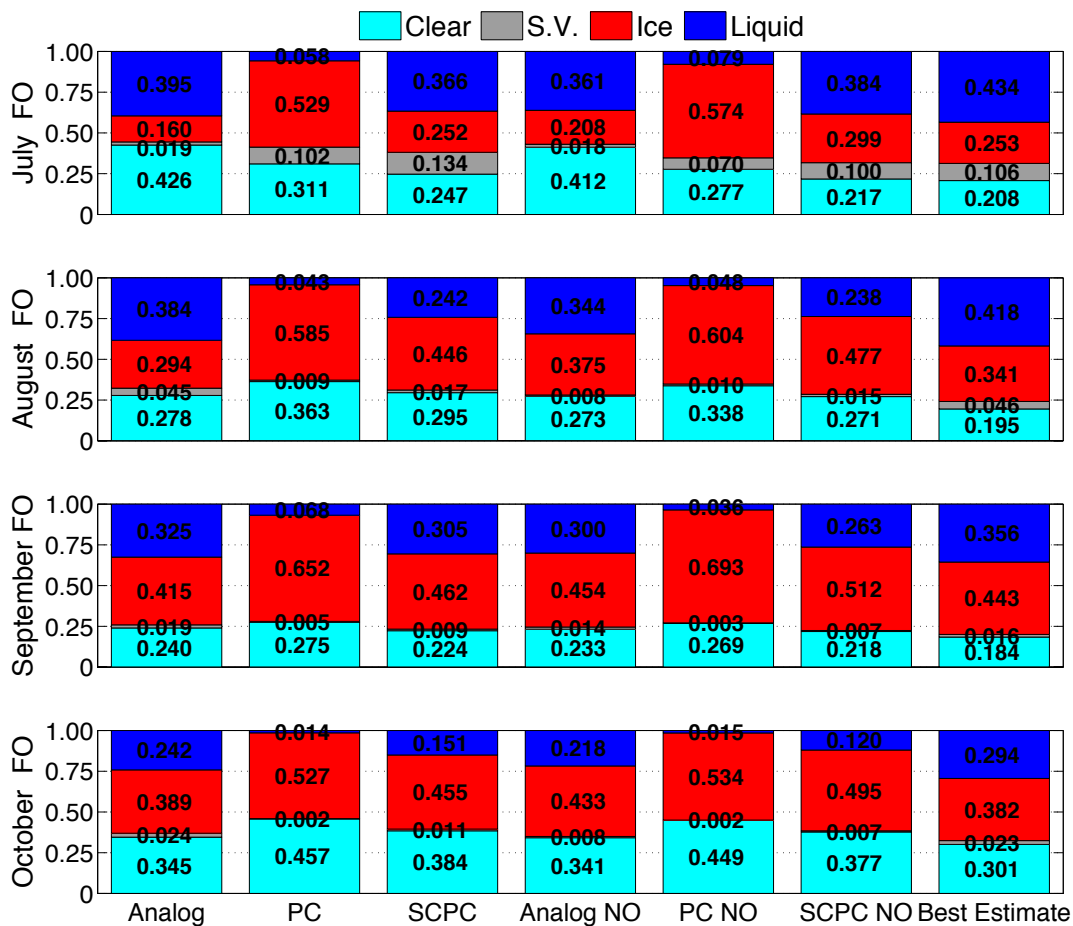

**Figure 5.** Fractional occurrence (FO) of each pixel type in the column for July 2015 to October 2015. To be labeled clear, the column must lack all sub-visible, ice, and water pixels. To be labeled sub-visible, the column must lack ice or water pixels. To be labeled as ice, a column must lack water pixels. If a column contains a water pixel, the column is labeled as liquid. The FO is given for each bar rounded to the nearest thousandth.

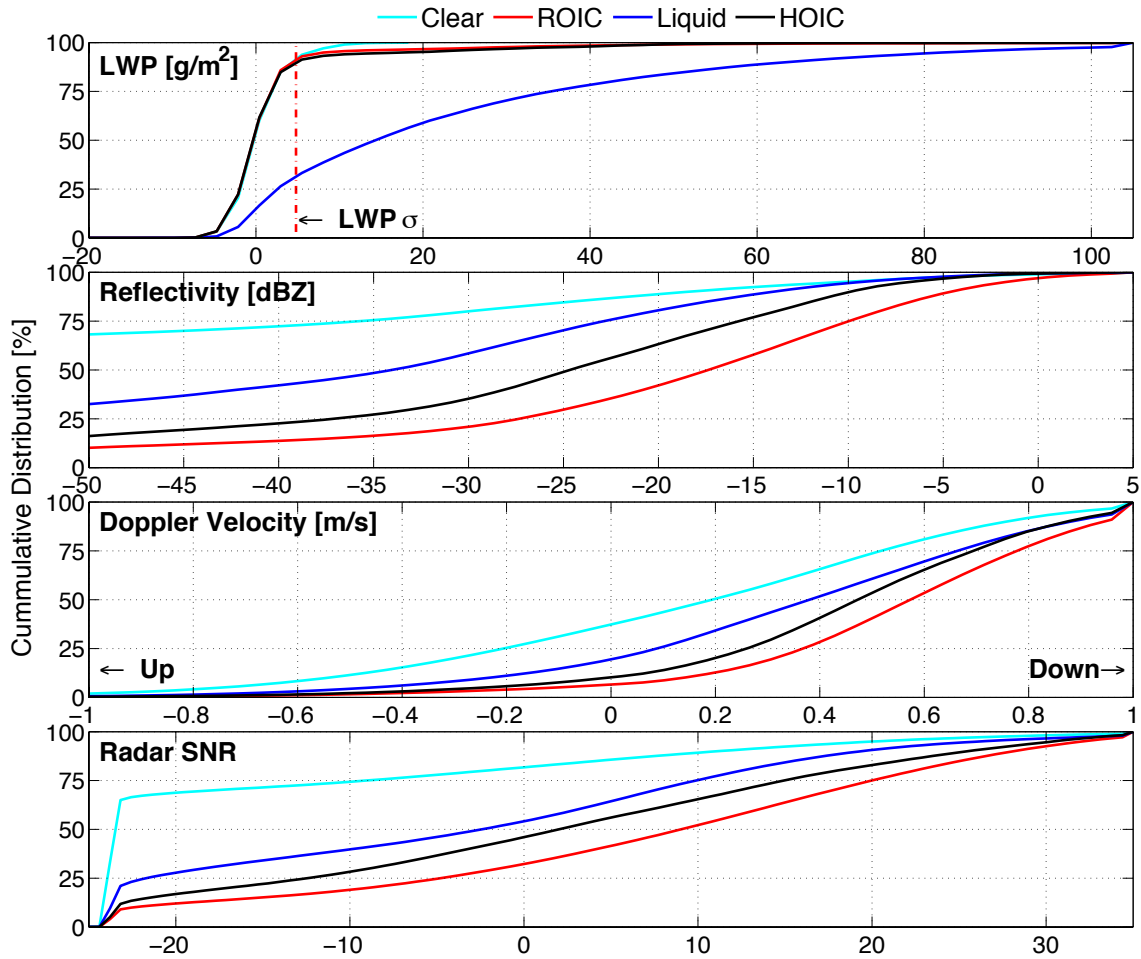

**Figure 6.** Cumulative distribution functions of co-located ICECAPS data parsed by CAPABL classification type. All data from July 2016 to December 2016, approximately 54 million radar voxels for each Doppler moment and 148,000 MWR column measurements, are collected and identified. Note that the average LWP uncertainty is given for the entire study period and that here a positive mean Doppler velocity is defined towards the zenith pointing radar system or downwards. For the LWP uncertainty, assuming an effective radius of  $r_e = 10 \mu\text{m}$ , a density of water of  $\rho = 1000 \text{ kg/m}^3$ , and using the approximate relation  $LWP = 2\tau r_e \rho / 3$  (Bendix, 2002) yields a threshold for optical depth of  $\tau = 0.75$ .

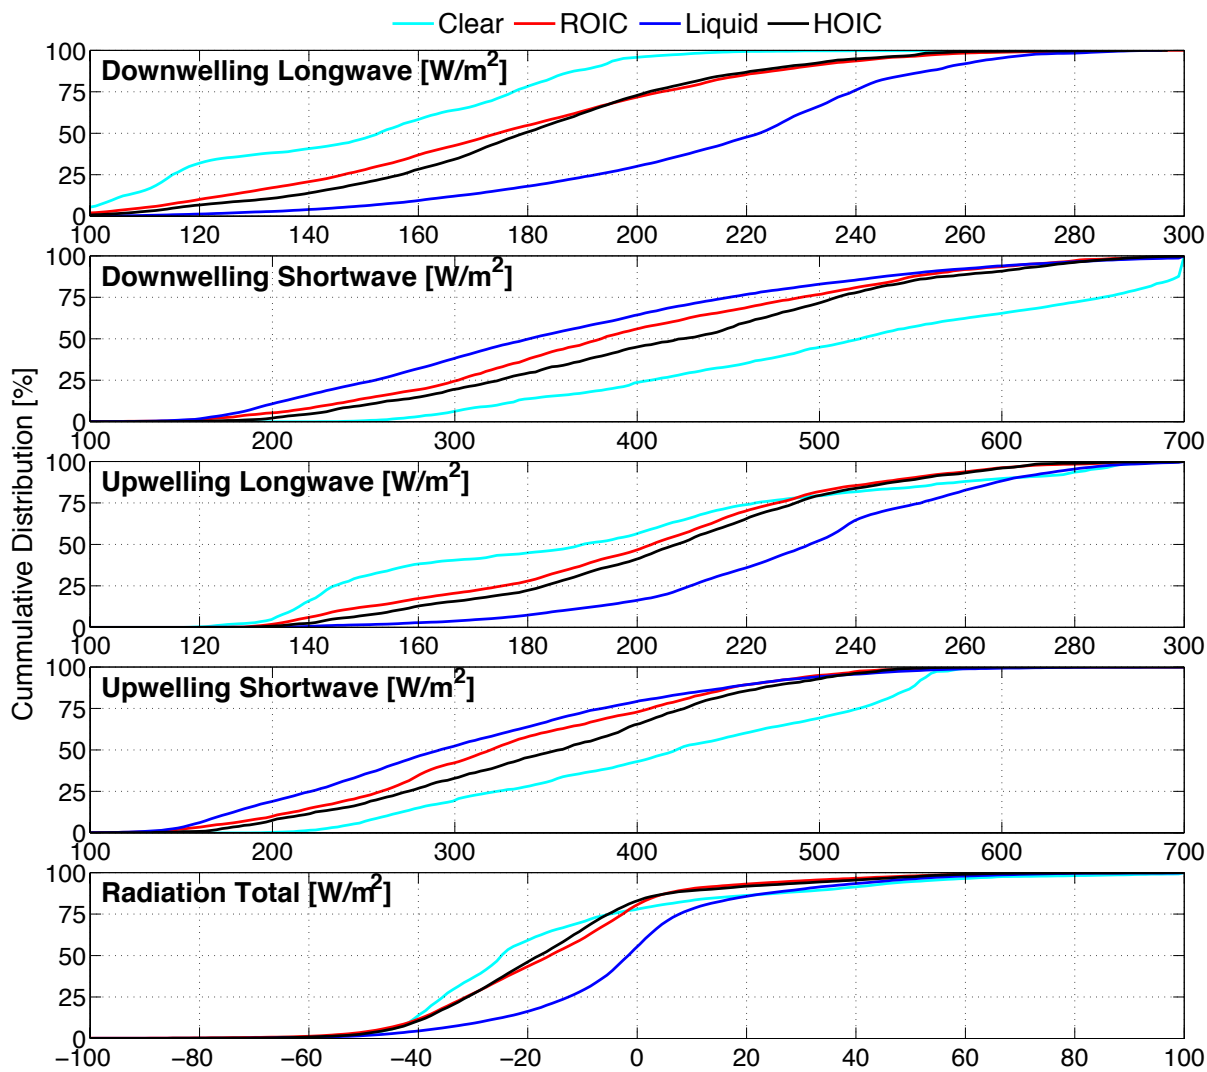

**Figure 7.** Cumulative distribution function of downwelling and upwelling radiation data at the surface parsed by CAPABL column classification type.

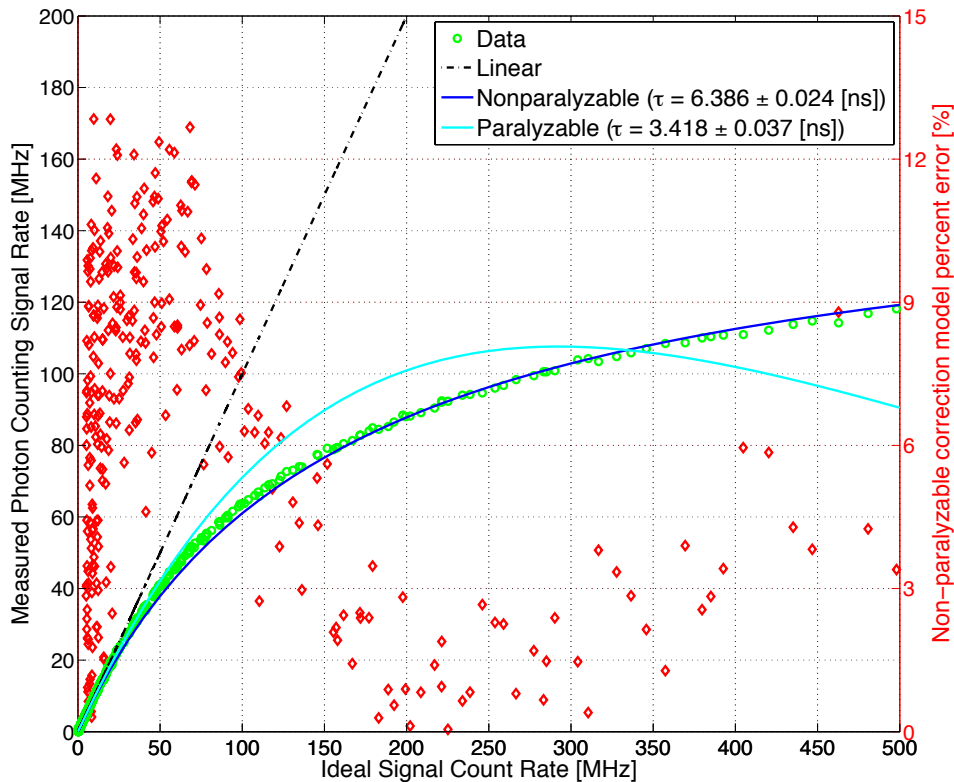

**Figure A1.** Saturation analysis of the CAPABL photon counting channel using the theory developed by Donovan et al. (1993); Whiteman (2003); Liu et al. (2009). The ideal signal count rate is found by normalizing the analog detection channel to the photon counting channel in a region where both are acting linearly which is about 1 MHz count rate. The measured count rate is then taken directly from photon counting measurements. The paralyzable and non-paralyzable models are then fit using a Levenberg-Marquardt weighted non-linear least squares fitting algorithm of the observed calibration data. The  $1\sigma$  confidence bound is given for each dead time fit parameter. Finally, the percent error of the correction model is given relative to the ideal count rate on the right ordinate as diamonds.

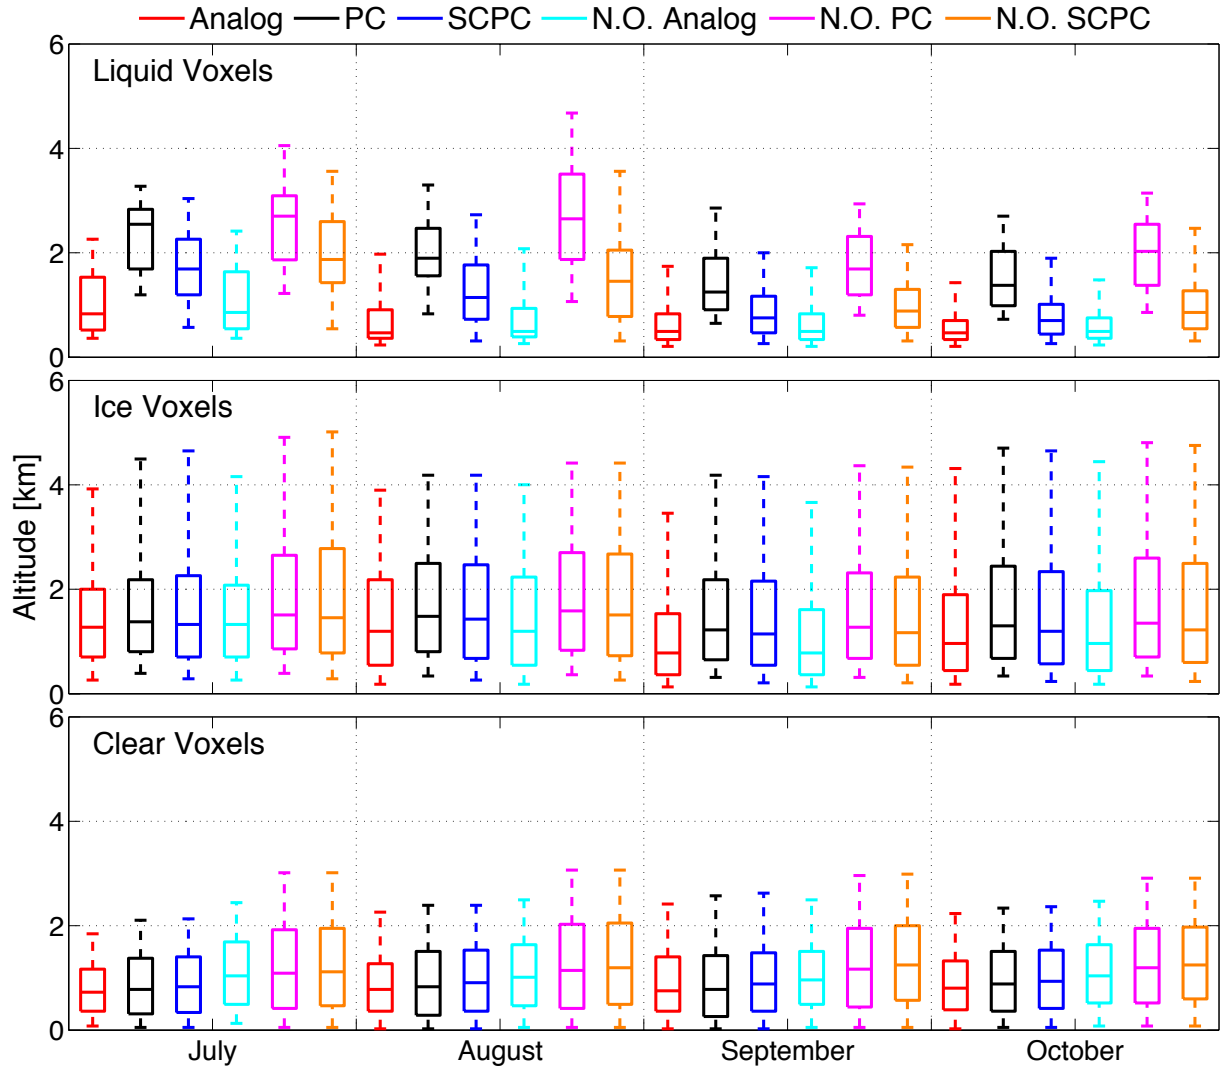

**Figure A2.** CAPABL data from July 2015 to October 2015 binned into liquid, ice, or clear air. The median is indicated by a line through the box, the 25th to 75th percentile ranges complete the box and the whiskers extend to the 5th and 95th percentiles. PC, SCPC, and N.O. stand for photon counting, saturation photon counting, and non-orthogonal, respectively. The channel sensitivity can be seen looking at the clear voxels where analog is expected to be less sensitive than PC and orthogonal less sensitive than non-orthogonal.

**Table 1.** CAPABL current system specifications. Polarization purity and polarization rejection are measured quantities. Polarization purity is measured with a 100,000:1 Glan-Taylor polarizer.

| Transmitter                                    | Receiver                          | Signal Processing                                  |
|------------------------------------------------|-----------------------------------|----------------------------------------------------|
| Big Sky Laser Ultra flashlamp<br>pumped Nd:YAG | Schmidt Cassegrain Telescope      | Combined analog and photon<br>counting acquisition |
| Wavelength: 532.3 nm                           | Receiver Aperture: 20.8 cm        | Data system:                                       |
| Pulse Energy: 60 mJ                            | Filter Bandwidth: 0.3 nm          | Licel Transient Recorder TR20-12 Bit               |
| Pulse Rate: 15 Hz                              | Channels: 1                       | Range bin size: 7.5 m                              |
| Twin Head                                      | Field of View: 1.4 mrad           | Integration time: 5 sec                            |
| Polarization Purity: > 123 : 1                 | Polarization Rejection: > 800 : 1 | PMT: Hamamatsu R7400U-03                           |
|                                                | Linear Polarizations Observed: 4  |                                                    |



**Table 2.** A summary of the data processing steps taken to create the data masks desired for CAPABL. The processing for each data type: Analog (An), Photon Counting (PC), and Saturation Corrected Photon Counting (SCPC), is constant except where noted. Note that the depolarization and diattenuation error equation are calculated per standard propagation of error techniques taking a Taylor series expansion of Eq. 2 and Eq. 3.

| Processing Step                      | Details                                                                                                                                                                                                                                                                                             |
|--------------------------------------|-----------------------------------------------------------------------------------------------------------------------------------------------------------------------------------------------------------------------------------------------------------------------------------------------------|
| 1) Time integration                  | To a constant 20 sec resolution                                                                                                                                                                                                                                                                     |
| 2) Spatial integration               | To a constant 30 m resolution                                                                                                                                                                                                                                                                       |
| 3) Saturation correction (PC Data)   | Creates SCPC level                                                                                                                                                                                                                                                                                  |
| 4) Background subtraction            |                                                                                                                                                                                                                                                                                                     |
| 5) SNR filter                        |                                                                                                                                                                                                                                                                                                     |
| 6) Speckle filter                    | 5 × 5 surrounding box<br>> 75% data already removed = bad<br>> 25% data available = good                                                                                                                                                                                                            |
| 7) Calculate polarization properties | Depolarization and depolarization ratio per Eq. 2 and 12<br>Depolarization and depolarization ratio error per error propagation of Eq. 2 and 12<br>Diattenuation per Eq. 3<br>Diattenuation error per error propagation of Eq. 3<br>Backscatter ratio ( $R$ ) per (Klett, 1981; Neely et al., 2013) |
| 8) Remove non-physical values        | Values outside $0 \leq \delta_O \leq 1$<br>Values outside $0 \leq \sigma_{\delta_O} \leq 0.4$<br>Values outside $-1 \leq D \leq 1$<br>Values outside $0 \leq \sigma_D \leq 0.2$                                                                                                                     |
| 9) Calculate base mask               | Clear: $1 \leq R < 2.6$<br>Aerosol: $2.6 \leq R < 6.5$<br>Cloud: $R \geq 6.5$                                                                                                                                                                                                                       |
| 10) Calculate phase mask             | Liquid: cloud voxels with $0 \leq \delta_O \leq 0.11$<br>Ice: cloud voxels with $\delta_O > 0.11$                                                                                                                                                                                                   |
| 11) Calculate orientation mask       | Random: ice with $0 \leq D_1 D_2 \leq 0.01$<br>Preferential: ice with $D_1 D_2 \geq 0.01$ and $\sigma_D \leq 0.05$<br>Saturation: ice with $D_1 D_2 \leq -0.01$                                                                                                                                     |

**Table 3.** Hardware comparison of relevant CAPABL and MPL lidar specifications. The resolutions quoted are limited in range by the MPL afterpulse calibration data and in time by the CAPABL scan rate. The resolutions presented are as close as the data can be processed before linear interpolation of MPL data to CAPABL's data grid. Effective power aperture product is reduced for CAPABL by the receiver attenuation by a factor of 1000.

| Specification                                                     | CAPABL       | MPL  |
|-------------------------------------------------------------------|--------------|------|
| Laser Power [W]                                                   | 0.3          | 0.02 |
| Receiver Attenuation [OD]                                         | 3            | 0    |
| Telescope Diameter [mm]                                           | 208          | 178  |
| Effective Power/Aperture Product [ $\text{W} \cdot \text{mm}^2$ ] | 10.2         | 497  |
| Polarizations                                                     | 4            | 2    |
| Range Resolution [m]                                              | 25.98        | 30   |
| Polarization Scan Resolution [s]                                  | $\approx 82$ | 80   |

**Table 4.** Radar operational mode configuration settings. The radar cycles between 4 modes of which only the cirrus and general modes are used in this work. The modes are cycled such that the general mode is every 4th measurement and the cirrus mode is every 8th at a cadence of approximately 0.5 sec per mode.

| Radar Mode                  | General | Cirrus |
|-----------------------------|---------|--------|
| Average power [W]           | 0.5353  | 7.146  |
| Intra-pulse period [ms]     | 96      | 115    |
| Pulse width [ns]            | 583     | 583    |
| Number of coded bits        | 0       | 16     |
| Number of coherent averages | 5       | 6      |
| Range resolution [m]        | 87.5    | 87.5   |

**Table 5.** Confusion matrix of CAPABL and MPL processed data. The diagonal shows agreement, highlighted by bold text. The last row and last column indicates one instrument had data removed by quality control steps, also highlighted in italics. Cells B and C indicate enhanced sensitivity by CAPABL processing and cells E and I indicate enhanced sensitivity by the MPL processing. Cell P indicates both instruments lack data implying that much of the data missed is in a regime not reachable via lidar (i.e. large optical depth). Three sets of data are given in each cell, which are identified by the last column. The first line of each cell covers the time period July 1st - July 31st, 2016. The second line of each cell covers December 1st - December 31st, 2016. The final row of each cell covers July 1st - December 31st, 2016.

|              | CAPABL Clear    | CAPABL Liquid   | CAPABL Ice      | CAPABL Filtered | Time Period |
|--------------|-----------------|-----------------|-----------------|-----------------|-------------|
| MPL Clear    | A) <b>69.7%</b> | B) 37.0%        | C) 62.2%        | D) 3.4%         | July        |
|              | <b>97.7%</b>    | 64.9%           | 78.9%           | 74.5%           | December    |
|              | <b>83.2%</b>    | 41.8%           | 63.9%           | 35.1%           | All         |
| MPL Liquid   | E) 0.3%         | F) <b>56.3%</b> | G) 5.5%         | H) 0.1%         | July        |
|              | 0.0%            | <b>26.3%</b>    | 0.2%            | 0.0%            | December    |
|              | 0.4%            | <b>47.9%</b>    | 2.0%            | 0.2%            | All         |
| MPL Ice      | I) 0.2%         | J) 3.7%         | K) <b>29.4%</b> | L) 0.5%         | July        |
|              | 0.2%            | 8.2%            | <b>20.2%</b>    | 0.3%            | December    |
|              | 1.4%            | 8.9%            | <b>31.7%</b>    | 1.1%            | All         |
| MPL Filtered | M) 29.9%        | N) 3.0%         | O) 3.0%         | P) <b>96.0%</b> | July        |
|              | 2.1%            | 0.5%            | 0.6%            | <b>25.2%</b>    | December    |
|              | 15.1%           | 2.5%            | 2.4%            | <b>63.7%</b>    | All         |

**Table 6.** Median values of the probability distribution function for each data processing type for each radiation component. Each radiation component is measured at the surface in units of  $W/m^2$ . Total flux is calculated using the relation:  $Total = LW \downarrow + SW \downarrow - LW \uparrow - SW \uparrow$ .

|                              | Type   | Merged | Analog | PC    | % Difference:<br>Merged and Analog | % Difference<br>Merged and PC |
|------------------------------|--------|--------|--------|-------|------------------------------------|-------------------------------|
| <b>Downwelling Longwave</b>  |        |        |        |       |                                    |                               |
|                              | Clear  | 153.3  | 162.1  | 155.3 | 5.6                                | 1.2                           |
|                              | ROIC   | 175.1  | 181.2  | 194.3 | 3.4                                | 10.4                          |
|                              | Liquid | 222.9  | 224.1  | 213.5 | 0.5                                | 4.3                           |
|                              | HOIC   | 179.8  | 179.2  | 179.9 | 0.4                                | 0.0                           |
| <b>Upwelling Longwave</b>    |        |        |        |       |                                    |                               |
|                              | Clear  | 190.6  | 209.8  | 204.3 | 9.6                                | 6.9                           |
|                              | ROIC   | 203.2  | 206.0  | 214.3 | 1.4                                | 5.3                           |
|                              | Liquid | 232.0  | 232.9  | 227.6 | 0.4                                | 2.0                           |
|                              | HOIC   | 207.8  | 206.4  | 207.5 | 0.6                                | 0.1                           |
| <b>Downwelling Shortwave</b> |        |        |        |       |                                    |                               |
|                              | Clear  | 524.1  | 571.7  | 539.8 | 8.7                                | 3.0                           |
|                              | ROIC   | 381.8  | 356.6  | 342.8 | 6.8                                | 10.8                          |
|                              | Liquid | 342.5  | 342.4  | 379.2 | 0.0                                | 10.2                          |
|                              | HOIC   | 426.2  | 418.9  | 418.0 | 1.7                                | 1.9                           |
| <b>Upwelling Shortwave</b>   |        |        |        |       |                                    |                               |
|                              | Clear  | 422.9  | 462.6  | 426.6 | 9.0                                | 0.9                           |
|                              | ROIC   | 321.2  | 309.4  | 294.6 | 3.7                                | 8.6                           |
|                              | Liquid | 293.3  | 293.0  | 323.8 | 0.1                                | 9.9                           |
|                              | HOIC   | 359.2  | 352.4  | 353.2 | 1.9                                | 1.7                           |
| <b>Total</b>                 |        |        |        |       |                                    |                               |
|                              | Clear  | -24.3  | -23.7  | -25.0 | -2.4                               | -2.7                          |
|                              | ROIC   | -15.5  | -14.7  | -9.0  | -4.9                               | -53.3                         |
|                              | Liquid | -1.1   | -0.7   | -4.0  | -48.2                              | -112.2                        |
|                              | HOIC   | -17.4  | -17.2  | -16.1 | -1.1                               | -7.4                          |
